# Supplementary material for: Neural stemness contributes to cell tumorigenicity
Source: Research Square preprint supplement (doi:10.21203/rs.3.rs-49965/v2), 2020-12-04
Supplement: Supplementary file 1 [file 57beda647d0fda874eb19701.xlsx]

## Sheet: 5283 Neural gene length
Transcript name	Gene name	Number of exons	Number of introns	Transcript length (nt)
NM_001198819	A1CF	15	14	86268
NM_001198820	A1CF	14	13	86268
NM_001198818	A1CF	14	13	86268
NM_014576	A1CF	13	12	86268
NM_138933	A1CF	13	12	86268
NM_138932	A1CF	13	12	86268
NM_023928	AACS	18	17	77948
NM_016228	AADAT	13	12	29812
NM_182662	AADAT	14	13	30001
NM_001286683	AADAT	14	13	30167
NM_001286682	AADAT	14	13	30001
NM_001271886	AAGAB	10	9	54063
NM_024666	AAGAB	10	9	54063
NM_001271885	AAGAB	10	9	54525
NM_014911	AAK1	22	21	185852
NM_001087	AAMP	11	10	6043
NM_001605	AARS	21	20	37117
NM_004920	AATK	13	12	14654
NM_001080395	AATK	14	13	48778
NM_020686	ABAT	16	15	109990
NM_001127448	ABAT	16	15	63861
NM_000663	ABAT	16	15	71608
NM_005502	ABCA1	50	49	147245
NM_001606	ABCA2	49	48	21056
NM_212533	ABCA2	49	48	21690
NM_000350	ABCA4	50	49	128313
NM_018672	ABCA5	38	37	71200
NM_172232	ABCA5	39	38	82749
NM_000927	ABCB1	29	28	209462
NM_005689	ABCB6	19	18	9226
NM_004996	ABCC1	31	30	193498
NM_003786	ABCC3	31	30	56847
NM_001144070	ABCC3	12	11	33072
NM_005845	ABCC4	31	30	281606
NM_001105515	ABCC4	21	20	205664
NM_001023587	ABCC5	7	6	34188
NM_005688	ABCC5	30	29	98005
NM_000352	ABCC8	39	38	83962
NM_001287174	ABCC8	39	38	83962
NM_007189	ABCF2	15	14	15892
NM_005692	ABCF2	16	15	19539
NM_001257386	ABCG2	16	15	141060
NM_004827	ABCG2	16	15	68597
NM_148913	ABHD11	6	5	2759
NM_001145364	ABHD11	5	4	2761
NM_148912	ABHD11	6	5	2759
NM_001039717	ABHD18	11	10	65996
NM_138340	ABHD3	9	8	53910
NM_022060	ABHD4	7	6	14120
NM_016006	ABHD5	7	6	31844
NM_005470	ABI1	12	11	114493
NM_001012752	ABI1	10	9	114493
NM_001012751	ABI1	10	9	114493
NM_001012750	ABI1	11	10	114493
NM_001178122	ABI1	10	9	114493
NM_001178121	ABI1	9	8	114493
NM_001178120	ABI1	10	9	114493
NM_001178119	ABI1	11	10	114493
NM_001178116	ABI1	12	11	114493
NM_001178125	ABI1	7	6	114493
NM_001178124	ABI1	8	7	114493
NM_001178123	ABI1	9	8	114493
NM_005759	ABI2	10	9	103936
NM_001282926	ABI2	10	9	103936
NM_001282925	ABI2	11	10	103936
NM_001282932	ABI2	10	9	103936
NM_001282927	ABI2	9	8	65291
NM_007313	ABL1	11	10	173796
NM_005157	ABL1	11	10	52233
NM_001168237	ABL2	13	12	130359
NM_001168236	ABL2	11	10	130359
NM_007314	ABL2	12	11	130359
NM_001136001	ABL2	10	9	119105
NM_001168238	ABL2	12	11	130359
NM_001168239	ABL2	12	11	43764
NM_001136000	ABL2	13	12	43764
NM_005158	ABL2	12	11	43764
NM_014945	ABLIM3	24	23	118947
NM_001159746	ABR	23	22	183860
NM_021962	ABR	23	22	176512
NM_001282149	ABR	18	17	75630
NM_001256847	ABR	8	7	28325
NM_001092	ABR	22	21	105584
NM_013375	ABT1	3	2	3108
NM_032169	ACAD11	20	19	101995
NM_001286044	ACADM	9	8	39333
NM_000016	ACADM	12	11	39333
NM_001286042	ACADM	11	10	39333
NM_001286043	ACADM	13	12	39333
NM_001127328	ACADM	12	11	39333
NM_001042473	ACBD5	13	12	46927
NM_001271512	ACBD5	12	11	45667
NM_145698	ACBD5	13	12	45667
NM_032360	ACBD6	8	7	214672
NM_133492	ACER1	6	5	27132
NM_001282449	ACHE	5	4	5979
NM_015831	ACHE	5	4	5928
NM_000665	ACHE	5	4	5928
NM_001164817	ACIN1	13	12	13007
NM_001164816	ACIN1	12	11	13007
NM_001164815	ACIN1	18	17	37051
NM_001164814	ACIN1	19	18	37051
NM_014977	ACIN1	19	18	37051
NM_001296	ACKR2	3	2	57813
NM_198830	ACLY	28	27	52095
NM_001096	ACLY	29	28	52095
NM_001098	ACO2	18	17	59866
NM_007274	ACOT7	9	8	129496
NM_181864	ACOT7	9	8	121553
NM_181865	ACOT7	9	8	96434
NM_181866	ACOT7	9	8	94674
NM_001037171	ACOT9	16	15	39632
NM_001033583	ACOT9	15	14	39632
NM_007292	ACOX1	14	13	37928
NM_001185039	ACOX1	14	13	37928
NM_004035	ACOX1	14	13	37928
NM_001610	ACP2	11	10	9606
NM_001131064	ACP2	4	3	3389
NM_030924	ACSBG2	15	14	57472
NM_001289180	ACSBG2	15	14	57472
NM_001289178	ACSBG2	15	14	57472
NM_001289179	ACSBG2	15	14	57472
NM_001289177	ACSBG2	15	14	57472
NM_025149	ACSF2	16	15	48689
NM_001288972	ACSF2	16	15	48689
NM_001288968	ACSF2	17	16	48689
NM_001288970	ACSF2	15	14	48689
NM_001288969	ACSF2	16	15	48689
NM_001288971	ACSF2	14	13	48689
NM_001995	ACSL1	21	20	70521
NM_001286711	ACSL1	20	19	70521
NM_001286712	ACSL1	22	21	53008
NM_001286708	ACSL1	21	20	56666
NM_001286710	ACSL1	21	20	50195
NM_022977	ACSL4	17	16	92059
NM_004458	ACSL4	16	15	92059
NM_001205248	ACSL6	21	20	61942
NM_001205251	ACSL6	20	19	61942
NM_001205250	ACSL6	21	20	62096
NM_001009185	ACSL6	21	20	61690
NM_001205247	ACSL6	21	20	61690
NM_015256	ACSL6	21	20	61690
NM_001252677	ACSS1	12	11	51954
NM_032501	ACSS1	14	13	51954
NM_001252675	ACSS1	14	13	51954
NM_001252676	ACSS1	13	12	26478
NM_001242393	ACSS2	18	17	53005
NM_018677	ACSS2	18	17	51443
NM_001076552	ACSS2	19	18	51443
NM_024560	ACSS3	16	15	177775
NM_001101	ACTB	6	5	3455
NM_001199954	ACTG1	6	5	2897
NM_001614	ACTG1	6	5	2897
NM_004301	ACTL6A	14	13	25487
NM_177989	ACTL6A	14	13	25487
NM_178042	ACTL6A	14	13	25487
NM_016188	ACTL6B	14	13	13360
NM_018477	ACTR10	13	12	35522
NM_005736	ACTR1A	11	10	23528
NM_005735	ACTR1B	11	10	8161
NM_001005386	ACTR2	10	9	43563
NM_005722	ACTR2	9	8	43563
NM_001105	ACVR1	11	10	138667
NM_001111067	ACVR1	11	10	139418
NM_001616	ACVR2A	11	10	85834
NM_001278580	ACVR2A	11	10	86312
NM_001278579	ACVR2A	12	11	86312
NM_001106	ACVR2B	11	10	38845
NM_001145400	ADAD2	10	9	6051
NM_139174	ADAD2	11	10	6051
NM_001110	ADAM10	16	15	154776
NM_002390	ADAM11	27	26	22648
NM_021641	ADAM12	19	18	347218
NM_003474	ADAM12	23	22	376175
NM_001288973	ADAM12	23	22	376175
NM_001288975	ADAM12	19	18	347218
NM_001288974	ADAM12	19	18	347218
NM_003183	ADAM17	19	18	66508
NM_033274	ADAM19	23	22	98521
NM_016351	ADAM22	30	29	268640
NM_021722	ADAM22	31	30	268640
NM_021721	ADAM22	28	27	247864
NM_004194	ADAM22	29	28	247864
NM_021723	ADAM22	31	30	268640
NM_003812	ADAM23	26	25	177488
NM_001282447	ADAM33	22	21	14160
NM_025220	ADAM33	22	21	14160
NM_153202	ADAM33	21	20	14160
NM_139056	ADAMTS16	23	22	179971
NM_139057	ADAMTS17	22	21	370542
NM_199355	ADAMTS18	23	22	152988
NM_021599	ADAMTS2	11	10	194547
NM_014244	ADAMTS2	22	21	234581
NM_025003	ADAMTS20	39	38	197714
NM_014243	ADAMTS3	22	21	287832
NM_007038	ADAMTS5	8	7	49210
NM_182920	ADAMTS9	40	39	172036
NM_006869	ADAP1	11	10	56784
NM_001284308	ADAP1	11	10	57508
NM_001284311	ADAP1	9	8	22991
NM_001284310	ADAP1	10	9	29317
NM_001284309	ADAP1	11	10	47917
NM_018404	ADAP2	11	10	37459
NM_015841	ADAR	15	14	26192
NM_015840	ADAR	15	14	26192
NM_001193495	ADAR	15	14	24244
NM_001025107	ADAR	15	14	45924
NM_001111	ADAR	15	14	26192
NM_015834	ADARB1	13	12	151987
NM_015833	ADARB1	12	11	151987
NM_001160230	ADARB1	12	11	151987
NM_001112	ADARB1	11	10	151987
NM_018702	ADARB2	10	9	556419
NM_021116	ADCY1	20	19	148591
NM_001281768	ADCY1	10	9	90534
NM_020546	ADCY2	25	24	433853
NM_020983	ADCY6	21	20	22841
NM_015270	ADCY6	21	20	17904
NM_001117	ADCYAP1	4	3	6978
NM_001099733	ADCYAP1	5	4	7231
NM_001199637	ADCYAP1R1	14	13	59019
NM_001199636	ADCYAP1R1	17	16	59019
NM_001199635	ADCYAP1R1	17	16	59019
NM_001118	ADCYAP1R1	16	15	59019
NM_017488	ADD2	17	16	106161
NM_017482	ADD2	13	12	93161
NM_001617	ADD2	16	15	106161
NM_001185055	ADD2	12	11	93161
NM_001185054	ADD2	16	15	105633
NM_024694	ADGB	36	35	216463
NM_001702	ADGRB1	30	29	80993
NM_001704	ADGRB3	32	31	753773
NM_005682	ADGRG1	15	14	45036
NM_201524	ADGRG1	15	14	36527
NM_001145773	ADGRG1	14	13	36527
NM_001145772	ADGRG1	15	14	36527
NM_001145771	ADGRG1	15	14	36527
NM_001145770	ADGRG1	15	14	45036
NM_201525	ADGRG1	14	13	36527
NM_001145774	ADGRG1	15	14	25739
NM_014921	ADGRL1	23	22	58450
NM_001008701	ADGRL1	24	23	58450
NM_012302	ADGRL2	20	19	192027
NM_015236	ADGRL3	23	22	575331
NM_032119	ADGRV1	90	89	605418
NM_000671	ADH5	9	8	17811
NM_000673	ADH7	9	8	23251
NM_001166504	ADH7	9	8	22875
NM_018269	ADI1	4	3	21662
NM_024551	ADIPOR2	8	7	97600
NM_001124	ADM	4	3	2283
NM_001282531	ADNP	6	5	42074
NM_015339	ADNP	5	4	42074
NM_181442	ADNP	4	3	42074
NM_001282532	ADNP	4	3	20875
NM_033303	ADRA1A	3	2	117257
NM_000680	ADRA1A	2	1	95702
NM_033304	ADRA1A	3	2	99553
NM_033302	ADRA1A	3	2	109011
NM_000679	ADRA1B	2	1	56279
NM_000678	ADRA1D	2	1	28383
NM_000681	ADRA2A	1	0	3874
NM_000683	ADRA2C	1	0	1959
NM_001281438	ADRM1	9	8	5968
NM_001281437	ADRM1	9	8	5968
NM_007002	ADRM1	10	9	5968
NM_175573	ADRM1	10	9	5968
NM_198969	AES	7	6	10058
NM_198970	AES	7	6	9465
NM_001130	AES	7	6	9465
NM_198595	AFAP1	17	16	181215
NM_001134647	AFAP1	18	17	181215
NM_001040000	AFDN	30	29	138124
NM_001207008	AFDN	32	31	145031
NM_006796	AFG3L2	17	16	48334
NM_000027	AGA	9	8	11730
NM_001171988	AGA	9	8	11730
NM_001122772	AGAP2	19	18	13955
NM_014770	AGAP2	18	17	17870
NM_152336	AGBL1	24	23	887043
NM_024783	AGBL2	19	18	55787
NM_178563	AGBL3	17	16	149273
NM_032785	AGBL4	14	13	1491101
NM_001035507	AGBL5	11	10	7914
NM_021831	AGBL5	15	14	19001
NM_012199	AGO1	19	18	41091
NM_198576	AGRN	36	35	35998
NM_001138	AGRP	4	3	1244
NM_001286717	AGTPBP1	25	24	195492
NM_015239	AGTPBP1	26	25	195492
NM_001286715	AGTPBP1	25	24	195492
NM_000686	AGTR2	3	2	4269
NM_015446	AHCTF1	36	35	92326
NM_001161766	AHCY	10	9	31539
NM_000687	AHCY	10	9	23146
NM_017651	AHI1	28	27	213795
NM_001134832	AHI1	23	22	109983
NM_001134831	AHI1	29	28	213795
NM_001134830	AHI1	27	26	213795
NM_022831	AIDA	10	9	44511
NM_032955	AIF1	3	2	1011
NM_001623	AIF1	6	5	1767
NM_004847	AIF1	3	2	1806
NM_145813	AIFM1	8	7	36525
NM_145812	AIFM1	16	15	36525
NM_001130847	AIFM1	17	16	36525
NM_001130846	AIFM1	7	6	8679
NM_004208	AIFM1	16	15	36525
NM_032797	AIFM2	9	8	20669
NM_001198696	AIFM2	9	8	20669
NM_001146288	AIFM3	20	19	14204
NM_144704	AIFM3	21	20	16233
NM_001018060	AIFM3	20	19	16233
NM_001142416	AIMP1	7	6	32719
NM_001142415	AIMP1	7	6	33616
NM_004757	AIMP1	7	6	33530
NM_006303	AIMP2	4	3	14585
NM_001285400	AIPL1	6	5	11464
NM_014336	AIPL1	6	5	11464
NM_001285402	AIPL1	6	5	11397
NM_001285401	AIPL1	6	5	11464
NM_001285403	AIPL1	5	4	9149
NM_001285399	AIPL1	6	5	11464
NM_001033055	AIPL1	5	4	11464
NM_001033054	AIPL1	5	4	11464
NM_016282	AK3	5	4	31754
NM_001199856	AK3	5	4	16672
NM_001199855	AK3	5	4	32244
NM_001199853	AK3	5	4	32488
NM_001199852	AK3	4	3	31754
NM_203464	AK4	6	5	84598
NM_001005353	AK4	6	5	84317
NM_013410	AK4	5	4	83980
NM_144497	AKAP12	3	2	33030
NM_005100	AKAP12	5	4	118562
NM_007200	AKAP13	37	36	368744
NM_006738	AKAP13	37	36	368744
NM_001270546	AKAP13	29	28	129410
NM_004857	AKAP5	2	1	9006
NM_004274	AKAP6	14	13	503791
NM_016377	AKAP7	8	7	147851
NM_138633	AKAP7	3	2	33378
NM_004842	AKAP7	2	1	33378
NM_147185	AKAP9	50	49	169800
NM_005751	AKAP9	50	49	169800
NM_024595	AKIRIN1	5	4	14823
NM_001136275	AKIRIN1	4	3	14823
NM_018064	AKIRIN2	5	4	27409
NM_001628	AKR1B1	10	9	16783
NM_001014432	AKT1	15	14	26395
NM_001014431	AKT1	14	13	26395
NM_005163	AKT1	14	13	24253
NM_032375	AKT1S1	5	4	8356
NM_001278160	AKT1S1	5	4	9325
NM_001278159	AKT1S1	5	4	7218
NM_001098633	AKT1S1	5	4	8356
NM_001098632	AKT1S1	5	4	8356
NM_001243027	AKT2	14	13	55080
NM_001626	AKT2	14	13	55080
NM_001243028	AKT2	13	12	55080
NM_000031	ALAD	12	11	15028
NM_000032	ALAS2	11	10	22011
NM_001037968	ALAS2	11	10	22011
NM_001037967	ALAS2	10	9	22011
NM_001243283	ALCAM	3	2	158675
NM_001243281	ALCAM	14	13	186459
NM_001243280	ALCAM	15	14	210202
NM_001627	ALCAM	16	15	210202
NM_001145396	ALDH16A1	16	15	17834
NM_153329	ALDH16A1	17	16	17834
NM_002860	ALDH18A1	18	17	50883
NM_001017423	ALDH18A1	18	17	50883
NM_000689	ALDH1A1	13	12	52657
NM_000693	ALDH1A3	13	12	36823
NM_000695	ALDH3B2	10	9	12471
NM_001031615	ALDH3B2	10	9	19054
NM_001278594	ALDH6A1	12	11	26830
NM_005589	ALDH6A1	12	11	26830
NM_001278593	ALDH6A1	12	11	26830
NM_001201377	ALDH7A1	18	17	53551
NM_001202404	ALDH7A1	16	15	53551
NM_001182	ALDH7A1	18	17	53551
NM_001039210	ALG13	4	3	9279
NM_001168385	ALG13	5	4	9279
NM_001257241	ALG13	4	3	9227
NM_018466	ALG13	4	3	9279
NM_001099922	ALG13	27	26	79531
NM_001257240	ALG13	4	3	9227
NM_001257239	ALG13	4	3	8740
NM_001257237	ALG13	26	25	79479
NM_001257235	ALG13	4	3	9227
NM_001257234	ALG13	26	25	79479
NM_001257231	ALG13	27	26	79479
NM_001257230	ALG13	26	25	79531
NM_033087	ALG2	2	1	5541
NM_005787	ALG3	9	8	6644
NM_001006941	ALG3	9	8	7198
NM_001077690	ALG9	16	15	89388
NM_001077692	ALG9	15	14	89087
NM_001077691	ALG9	15	14	89087
NM_024740	ALG9	16	15	89388
NM_004304	ALK	29	28	728839
NM_001002919	ALKAL2	6	5	8749
NM_138775	ALKBH8	12	11	63010
NM_015120	ALMS1	23	22	224162
NM_001177520	ALPL	10	9	69049
NM_001127501	ALPL	11	10	69049
NM_000478	ALPL	12	11	69049
NM_020919	ALS2	34	33	80911
NM_001135745	ALS2	4	3	21716
NM_006982	ALX1	4	3	21527
NM_005782	ALYREF	6	5	3753
NM_017749	AMBRA1	19	18	194954
NM_001267783	AMBRA1	18	17	197659
NM_001267782	AMBRA1	20	19	197659
NM_001145815	AMDHD2	11	10	10594
NM_015944	AMDHD2	10	9	9371
NM_152424	AMER1	2	1	20629
NM_199138	AMER2	3	2	10490
NM_152704	AMER2	1	0	10606
NM_152698	AMER3	2	1	12632
NM_001105195	AMER3	2	1	11845
NM_001105194	AMER3	2	1	11845
NM_001105193	AMER3	2	1	12485
NM_001144	AMFR	14	13	64088
NM_020703	AMIGO1	2	1	2892
NM_181847	AMIGO2	2	1	4246
NM_001143668	AMIGO2	3	2	3353
NM_015365	AMMECR1	6	5	123968
NM_001025580	AMMECR1	5	4	123968
NM_001171689	AMMECR1	8	7	246049
NM_016201	AMOTL2	10	9	19242
NM_001278683	AMOTL2	10	9	20074
NM_001278685	AMOTL2	10	9	19242
NM_203404	AMPD2	16	15	6630
NM_001257361	AMPD2	18	17	8069
NM_001257360	AMPD2	19	18	12244
NM_139156	AMPD2	18	17	12244
NM_004037	AMPD2	18	17	11476
NM_139316	AMPH	20	19	247872
NM_001635	AMPH	21	20	247872
NM_001033572	AMZ2	8	7	9162
NM_001289056	AMZ2	8	7	9162
NM_001033570	AMZ2	8	7	9162
NM_001033569	AMZ2	8	7	9162
NM_016627	AMZ2	7	6	9162
NM_001033574	AMZ2	6	5	9162
NM_001033571	AMZ2	8	7	9162
NM_001289054	AMZ2	8	7	9162
NM_013366	ANAPC2	13	12	13823
NM_013367	ANAPC4	29	28	41274
NM_001286756	ANAPC4	29	28	41274
NM_001127493	ANK2	47	46	565659
NM_020977	ANK2	45	44	334113
NM_001148	ANK2	46	45	334113
NM_001204403	ANK3	44	43	707230
NM_020987	ANK3	44	43	363580
NM_001149	ANK3	21	20	114720
NM_001204404	ANK3	44	43	546660
NM_016376	ANKFY1	25	24	100611
NM_001257999	ANKFY1	25	24	100479
NM_015114	ANKLE2	13	12	36199
NM_020319	ANKMY2	10	9	46043
NM_017664	ANKRD10	6	5	36569
NM_001286721	ANKRD10	5	4	22417
NM_015208	ANKRD12	13	12	149234
NM_001204056	ANKRD12	12	11	148424
NM_001083625	ANKRD12	12	11	149234
NM_033121	ANKRD13A	15	14	40002
NM_133475	ANKRD24	22	21	41462
NM_016466	ANKRD39	4	3	10034
NM_001270379	ANKRD46	6	5	50036
NM_001270378	ANKRD46	5	4	38941
NM_001270377	ANKRD46	5	4	39016
NM_198401	ANKRD46	6	5	39016
NM_001242809	ANKRD6	16	15	200658
NM_001242813	ANKRD6	15	14	200658
NM_014942	ANKRD6	16	15	200658
NM_001242814	ANKRD6	13	12	66998
NM_001242811	ANKRD6	16	15	71518
NM_015245	ANKS1A	24	23	202154
NM_152788	ANKS1B	26	25	1249865
NM_001204068	ANKS1B	12	11	410827
NM_001204081	ANKS1B	10	9	160107
NM_001204079	ANKS1B	11	10	150924
NM_001204070	ANKS1B	11	10	410827
NM_001204069	ANKS1B	12	11	410827
NM_001204067	ANKS1B	12	11	411118
NM_001204066	ANKS1B	12	11	410895
NM_001204065	ANKS1B	11	10	150924
NM_020140	ANKS1B	11	10	420010
NM_001204080	ANKS1B	10	9	150924
NM_181670	ANKS1B	13	12	410827
NM_133450	ANKS3	18	17	37654
NM_001242929	ANKS3	15	14	37869
NM_018043	ANO1	26	25	111246
NM_001286616	ANO4	27	26	226997
NM_178826	ANO4	27	26	334047
NM_001286615	ANO4	28	27	334047
NM_001025356	ANO6	20	19	216366
NM_001142679	ANO6	20	19	224419
NM_001142678	ANO6	20	19	139670
NM_001204803	ANO6	21	20	216366
NM_020959	ANO8	18	17	11608
NM_000216	ANOS1	14	13	203314
NG_046632	AOX2	1	0	53198
NM_001127	AP1B1	23	22	60905
NM_145730	AP1B1	21	20	60905
NM_001166019	AP1B1	21	20	60905
NM_001128	AP1G1	23	22	80073
NM_001030007	AP1G1	24	23	80073
NM_001130524	AP1M1	13	12	37493
NM_032493	AP1M1	12	11	37493
NM_001283	AP1S1	5	4	6873
NM_130787	AP2A1	23	22	40191
NM_014203	AP2A1	24	23	40191
NM_012305	AP2A2	22	21	86438
NM_001242837	AP2A2	22	21	86438
NM_001278511	AP3B2	25	24	50629
NM_001278512	AP3B2	27	26	50629
NM_004644	AP3B2	26	25	50629
NM_001261826	AP3D1	32	31	50571
NM_003938	AP3D1	30	29	50571
NM_006803	AP3M2	9	8	18239
NM_001134296	AP3M2	10	9	18239
NM_001284	AP3S1	6	5	72161
NM_004722	AP4M1	15	14	5675
NM_007077	AP4S1	6	5	60334
NM_001128126	AP4S1	6	5	70982
NM_001254726	AP4S1	5	4	60334
NM_001254729	AP4S1	6	5	71346
NM_001254728	AP4S1	6	5	69809
NM_001254727	AP4S1	7	6	60334
NM_001163	APBA1	13	12	244828
NM_001166050	APBB2	18	17	404593
NM_004307	APBB2	18	17	404593
NM_173075	APBB2	17	16	404593
NM_001166054	APBB2	7	6	47167
NM_001166053	APBB2	7	6	47167
NM_001166052	APBB2	7	6	47130
NM_001166051	APBB2	7	6	47130
NM_001127511	APC	14	13	138736
NM_001127510	APC	17	16	108382
NM_000038	APC	16	15	108382
NM_005883	APC2	15	14	23097
NM_080649	APEX1	5	4	2643
NM_001641	APEX1	5	4	2643
NM_001244249	APEX1	5	4	2643
NM_080648	APEX1	5	4	2643
NM_016022	APH1A	6	5	3812
NM_001243772	APH1A	6	5	3812
NM_001243771	APH1A	5	4	3812
NM_001077628	APH1A	7	6	3812
NM_031301	APH1B	6	5	31578
NM_001145646	APH1B	5	4	31578
NM_001243747	API5	11	10	32577
NM_006595	API5	14	13	32577
NM_001142931	API5	13	12	32577
NM_001142930	API5	14	13	32577
NM_017413	APLN	3	2	9699
NM_001142278	APLP2	13	12	74992
NM_001142277	APLP2	16	15	74992
NM_001142276	APLP2	17	16	74992
NM_001642	APLP2	18	17	74992
NM_001243299	APLP2	17	16	74245
NM_020531	APMAP	9	8	29847
NM_001647	APOD	5	4	15505
NM_201413	APP	17	16	290279
NM_001136016	APP	17	16	259849
NM_201414	APP	16	15	290279
NM_001136131	APP	16	15	290587
NM_001136129	APP	15	14	290279
NM_001136130	APP	17	16	290279
NM_001204303	APP	15	14	290279
NM_001204302	APP	16	15	290279
NM_001204301	APP	17	16	290279
NM_000484	APP	18	17	290279
NM_012096	APPL1	22	21	45735
NM_001251905	APPL2	21	20	60110
NM_001251904	APPL2	21	20	62935
NM_018171	APPL2	21	20	62935
NM_004925	AQP3	6	5	6481
NM_001650	AQP4	5	4	13710
NM_004028	AQP4	4	3	10569
NM_001654	ARAF	16	15	10823
NM_001256196	ARAF	16	15	10823
NM_001256197	ARAF	6	5	4876
NM_001024228	ARF1	5	4	16064
NM_001024227	ARF1	5	4	16064
NM_001024226	ARF1	5	4	16554
NM_001658	ARF1	5	4	16554
NM_001660	ARF4	6	5	26127
NM_001663	ARF6	2	1	4038
NM_175609	ARFGAP1	14	13	17007
NM_001281484	ARFGAP1	12	11	17007
NM_001281483	ARFGAP1	13	12	17007
NM_001281482	ARFGAP1	14	13	17007
NM_018209	ARFGAP1	13	12	17007
NM_001242832	ARFGAP2	15	14	12829
NM_032389	ARFGAP2	16	15	12829
NM_014570	ARFGAP3	16	15	60878
NM_001142293	ARFGAP3	15	14	60878
NM_006421	ARFGEF1	39	38	146030
NM_006420	ARFGEF2	39	38	114957
NM_020340	ARFGEF3	34	33	182749
NM_018011	ARGLU1	4	3	24854
NM_004308	ARHGAP1	13	12	23592
NM_199357	ARHGAP11A	11	10	20693
NM_001286480	ARHGAP11A	13	12	24461
NM_014783	ARHGAP11A	12	11	24461
NM_001286479	ARHGAP11A	12	11	24807
NM_018287	ARHGAP12	20	19	123480
NM_001270695	ARHGAP12	19	18	123480
NM_001270696	ARHGAP12	18	17	123480
NM_001270699	ARHGAP12	16	15	103530
NM_001270698	ARHGAP12	17	16	123480
NM_001270697	ARHGAP12	19	18	123480
NM_018460	ARHGAP15	14	13	639024
NM_001204300	ARHGAP19	11	10	70502
NM_032900	ARHGAP19	12	11	70502
NM_001256423	ARHGAP19	12	11	48519
NM_020824	ARHGAP21	26	25	140061
NM_001042669	ARHGAP24	8	7	223974
NM_001025616	ARHGAP24	10	9	527541
NM_031305	ARHGAP24	7	6	72399
NM_001287805	ARHGAP24	8	7	174779
NM_001135608	ARHGAP26	23	22	458282
NM_015071	ARHGAP26	23	22	458282
NM_001010000	ARHGAP28	17	16	81282
NM_004815	ARHGAP29	23	22	68846
NM_001142685	ARHGAP32	22	21	227140
NM_014715	ARHGAP32	13	12	59135
NM_001172630	ARHGAP33	21	20	13309
NM_052948	ARHGAP33	21	20	13309
NM_004491	ARHGAP35	6	5	86402
NM_025251	ARHGAP39	13	12	84327
NM_001164741	ARHGAP4	23	22	18886
NM_001666	ARHGAP4	22	21	18886
NM_014859	ARHGAP44	21	20	202133
NM_001185078	ARHGDIA	6	5	3687
NM_001185077	ARHGDIA	6	5	3195
NM_004309	ARHGDIA	6	5	3687
NM_199002	ARHGEF1	29	28	23160
NM_004706	ARHGEF1	29	28	24339
NM_198977	ARHGEF1	28	27	24339
NM_014629	ARHGEF10	29	28	134660
NM_198236	ARHGEF11	41	40	110532
NM_014784	ARHGEF11	40	39	110532
NM_025014	ARHGEF15	16	15	11696
NM_173728	ARHGEF15	16	15	12280
NM_014448	ARHGEF16	15	14	26532
NM_001162384	ARHGEF2	22	21	31708
NM_001162383	ARHGEF2	22	21	31708
NM_004723	ARHGEF2	22	21	31338
NM_001111270	ARHGEF25	16	15	7067
NM_182947	ARHGEF25	15	14	5812
NM_015595	ARHGEF26	15	14	136469
NM_001251962	ARHGEF26	15	14	136826
NM_001251963	ARHGEF26	15	14	136469
NM_001001669	ARHGEF37	13	12	53394
NM_015320	ARHGEF4	14	13	130604
NM_032995	ARHGEF4	12	11	129858
NM_001113512	ARHGEF7	18	17	179920
NM_001113511	ARHGEF7	20	19	179920
NM_001113513	ARHGEF7	20	19	118910
NM_145735	ARHGEF7	19	18	179920
NM_003899	ARHGEF7	20	19	152022
NM_001173480	ARHGEF9	9	8	120185
NM_001173479	ARHGEF9	9	8	150580
NM_015185	ARHGEF9	10	9	120185
NM_006015	ARID1A	20	19	86081
NM_139135	ARID1A	20	19	86081
NM_020732	ARID1B	20	19	432851
NM_017519	ARID1B	19	18	432851
NM_032199	ARID5B	10	9	195696
NM_001244638	ARID5B	7	6	47739
NM_005744	ARIH1	14	13	112231
NM_182896	ARL13B	11	10	75541
NM_001174151	ARL13B	9	8	75541
NM_001174150	ARL13B	10	9	75541
NM_144996	ARL13B	8	7	75541
NM_152316	ARL14EP	4	3	14518
NM_004311	ARL3	6	5	40708
NM_005737	ARL4C	1	0	4009
NM_001282431	ARL4C	2	1	4013
NM_015161	ARL6IP1	6	5	9868
NM_006407	ARL6IP5	3	2	21151
NM_001256129	ARL8A	6	5	11341
NM_138795	ARL8A	7	6	11341
NM_018184	ARL8B	7	6	58673
NM_018120	ARMC1	7	6	31763
NM_001286702	ARMC1	6	5	31763
NM_032131	ARMC2	18	17	126058
NM_001286609	ARMC2	17	16	126058
NM_018076	ARMC4	20	19	186882
NM_001282231	ARMCX2	6	5	4610
NM_177949	ARMCX2	6	5	4610
NM_014782	ARMCX2	5	4	4610
NM_001286035	ARNT	23	22	67065
NM_178427	ARNT	21	20	67065
NM_001668	ARNT	22	21	67065
NM_001197325	ARNT	21	20	67065
NM_001286036	ARNT	22	21	67065
NM_014862	ARNT2	19	18	193587
NM_001248002	ARNTL2	16	15	92961
NM_001248004	ARNTL2	15	14	92961
NM_001248005	ARNTL2	14	13	92961
NM_001248003	ARNTL2	15	14	92961
NM_020183	ARNTL2	17	16	92961
NM_001190996	ARPC1A	10	9	40391
NM_006409	ARPC1A	10	9	40391
NM_152862	ARPC2	11	10	37256
NM_005731	ARPC2	10	9	36953
NM_001024959	ARPC4	6	5	14612
NM_001024960	ARPC4	6	5	14612
NM_005718	ARPC4	6	5	14559
NM_001198780	ARPC4	6	5	13990
NM_001270439	ARPC5	4	3	9750
NM_005717	ARPC5	4	3	9750
NM_004312	ARR3	17	16	13507
NM_020251	ARRB1	15	14	91711
NM_004041	ARRB1	16	15	91711
NM_199004	ARRB2	14	13	11008
NM_001257330	ARRB2	15	14	11008
NM_001257331	ARRB2	14	13	11008
NM_001257329	ARRB2	15	14	11008
NM_001257328	ARRB2	15	14	11008
NM_004313	ARRB2	15	14	11008
NM_198709	ARSB	8	7	170434
NM_000046	ARSB	8	7	209322
NM_014960	ARSG	12	11	161679
NM_001267727	ARSG	12	11	129366
NM_001136215	ARTN	4	3	3922
NM_057091	ARTN	5	4	3922
NM_057090	ARTN	5	4	3922
NM_001670	ARVCF	20	19	46909
NM_139058	ARX	5	4	12254
NM_001127505	ASAH1	14	13	28584
NM_004315	ASAH1	14	13	28584
NM_177924	ASAH1	14	13	27956
NM_001135191	ASAP2	27	26	198920
NM_003887	ASAP2	28	27	198920
NM_080873	ASB11	7	6	33917
NM_001201583	ASB11	7	6	33917
NM_001012428	ASB11	7	6	32852
NM_080874	ASB5	7	6	55549
NM_004316	ASCL1	2	1	2844
NM_005170	ASCL2	2	1	2456
NM_020646	ASCL3	2	1	5463
NM_018154	ASF1B	4	3	17121
NM_001261832	ASH2L	15	14	34289
NM_001282272	ASH2L	15	14	34589
NM_001105214	ASH2L	16	15	34289
NM_004674	ASH2L	16	15	34589
NM_001095	ASIC1	12	11	25987
NM_020039	ASIC1	12	11	25987
NM_001256830	ASIC1	10	9	10039
NM_183377	ASIC2	10	9	279902
NM_001094	ASIC2	10	9	1143721
NM_182847	ASIC4	9	8	24604
NM_001024946	ASL	15	14	17497
NM_001024944	ASL	15	14	17497
NM_001024943	ASL	16	15	17497
NM_000048	ASL	17	16	17555
NM_004317	ASNA1	7	6	10833
NM_181718	ASPHD1	3	2	5232
NM_018136	ASPM	28	27	62569
NM_001206846	ASPM	27	26	62569
NM_000050	ASS1	16	15	56569
NM_054012	ASS1	15	14	56569
NM_001288950	ASTE1	7	6	12983
NM_014065	ASTE1	6	5	12983
NM_207108	ASTN1	22	21	296088
NM_004319	ASTN1	23	22	303842
NM_001286164	ASTN1	23	22	307601
NM_032810	ATAD1	10	9	65044
NM_024857	ATAD5	23	22	63274
NM_024909	ATAT1	11	10	17837
NM_001254952	ATAT1	10	9	17835
NM_001031722	ATAT1	13	12	19937
NM_033064	ATCAY	13	12	47464
NM_005171	ATF1	7	6	57156
NM_001256092	ATF2	13	12	95958
NM_001256094	ATF2	8	7	53965
NM_001256091	ATF2	14	13	95958
NM_001256090	ATF2	15	14	95958
NM_001256093	ATF2	13	12	95958
NM_001880	ATF2	14	13	95958
NM_001030287	ATF3	4	3	55445
NM_001040619	ATF3	4	3	12151
NM_001674	ATF3	4	3	12151
NM_001206488	ATF3	4	3	12151
NM_001206486	ATF3	4	3	5761
NM_001206484	ATF3	5	4	12151
NM_001675	ATF4	2	1	2129
NM_182810	ATF4	3	2	2124
NM_012068	ATF5	4	3	5236
NM_001193646	ATF5	3	2	4795
NM_001277783	ATG12	3	2	13656
NM_004707	ATG12	4	3	13656
NM_030803	ATG16L1	18	17	44105
NM_001190267	ATG16L1	18	17	44105
NM_001190266	ATG16L1	18	17	44105
NM_198890	ATG16L1	14	13	44105
NM_017974	ATG16L1	17	16	44105
NM_001278712	ATG3	11	10	29458
NM_022488	ATG3	12	11	29458
NM_013325	ATG4B	13	12	36246
NM_178326	ATG4B	13	12	36246
NM_032852	ATG4C	11	10	81166
NM_178221	ATG4C	11	10	81166
NM_001281504	ATG4D	10	9	9531
NM_032885	ATG4D	10	9	9531
NM_001286107	ATG5	7	6	141345
NM_001286108	ATG5	8	7	141345
NM_004849	ATG5	8	7	141345
NM_001286106	ATG5	8	7	140960
NM_001286111	ATG5	5	4	141345
NM_001144912	ATG7	17	16	285131
NM_006395	ATG7	19	18	285131
NM_001136031	ATG7	18	17	285131
NM_004044	ATIC	16	15	37819
NM_015915	ATL1	14	13	73043
NM_001127713	ATL1	14	13	99986
NM_181598	ATL1	13	12	73043
NM_000051	ATM	63	62	146269
NM_015251	ATMIN	4	3	11495
NM_005172	ATOH1	1	0	1066
NM_145178	ATOH7	1	0	1520
NM_173694	ATP11C	30	29	105944
NM_001010986	ATP11C	29	28	105944
NM_001141974	ATP13A2	27	26	25972
NM_001141973	ATP13A2	29	28	25972
NM_022089	ATP13A2	29	28	25972
NM_032279	ATP13A4	30	29	152832
NM_000701	ATP1A1	23	22	31603
NM_001160234	ATP1A1	23	22	21406
NM_001160233	ATP1A1	23	22	30909
NM_000702	ATP1A2	23	22	27856
NM_001256213	ATP1A3	23	22	26887
NM_001256214	ATP1A3	23	22	27696
NM_152296	ATP1A3	23	22	27696
NM_001677	ATP1B1	6	5	26015
NM_001678	ATP1B2	7	6	6837
NM_033276	ATP23	6	5	15609
NM_001683	ATP2B2	20	19	181563
NM_001001331	ATP2B2	23	22	181563
NM_001001344	ATP2B3	20	19	46809
NM_021949	ATP2B3	21	20	46809
NM_001686	ATP5F1B	10	9	7895
NM_001697	ATP5PO	7	6	12403
NM_001183	ATP6AP1	10	9	7887
NM_005765	ATP6AP2	9	8	25674
NM_001198569	ATP6V0C	4	3	6499
NM_001694	ATP6V0C	3	2	6355
NM_004691	ATP6V0D1	8	7	43174
NM_001690	ATP6V1A	15	14	65041
NM_015994	ATP6V1D	9	8	22141
NM_001198909	ATP6V1F	3	2	3048
NM_004231	ATP6V1F	2	1	3048
NM_004888	ATP6V1G1	3	2	11160
NM_213619	ATP6V1H	13	12	127770
NM_213620	ATP6V1H	14	13	127501
NM_015941	ATP6V1H	14	13	127770
NM_001243728	ATPAF1	9	8	30841
NM_001256418	ATPAF1	10	9	30841
NM_022745	ATPAF1	9	8	33390
NM_001042546	ATPAF1	7	6	33390
NM_001184	ATR	47	46	129593
NM_001207047	ATRN	25	24	144887
NM_139322	ATRN	25	24	144887
NM_139321	ATRN	29	28	180106
NM_207303	ATRNL1	29	28	855374
NM_001276282	ATRNL1	8	7	78003
NM_000489	ATRX	35	34	281401
NM_138270	ATRX	34	33	281401
NM_013236	ATXN10	12	11	173511
NM_001167621	ATXN10	11	10	173511
NM_001137675	ATXN1L	3	2	11344
NM_001164781	ATXN3	9	8	48071
NM_001164779	ATXN3	7	6	48071
NM_001164780	ATXN3	8	7	48071
NM_001127696	ATXN3	10	9	48071
NM_030660	ATXN3	10	9	48071
NM_001127697	ATXN3	9	8	48071
NM_001164782	ATXN3	3	2	48071
NM_001164778	ATXN3	7	6	48071
NM_001164776	ATXN3	5	4	48071
NM_001164774	ATXN3	4	3	48071
NM_001164777	ATXN3	4	3	48071
NM_004993	ATXN3	11	10	48071
NM_001177387	ATXN7	13	12	105063
NM_000333	ATXN7	13	12	138905
NM_001128149	ATXN7	9	8	35718
NM_001136262	ATXN7L3B	1	0	3683
NM_181575	AUP1	12	11	3201
NM_198437	AURKA	9	8	22908
NM_198435	AURKA	9	8	22908
NM_198434	AURKA	10	9	22908
NM_198433	AURKA	11	10	22908
NM_198436	AURKA	10	9	22908
NM_003600	AURKA	9	8	22908
NM_001256834	AURKB	8	7	5897
NM_004217	AURKB	9	8	5897
NM_001284526	AURKB	9	8	5897
NM_015570	AUTS2	19	18	1193981
NM_001127232	AUTS2	5	4	691703
NM_001127231	AUTS2	18	17	1193572
NM_006576	AVIL	19	18	18694
NM_015060	AVL9	16	15	88605
NM_000490	AVP	3	2	2170
NM_000706	AVPR1A	2	1	10053
NM_000707	AVPR1B	2	1	7201
NM_003502	AXIN1	11	10	65238
NM_181050	AXIN1	10	9	65238
NM_004655	AXIN2	11	10	33059
NM_021913	AXL	20	19	42570
NM_001699	AXL	19	18	42570
NM_001278599	AXL	17	16	35014
NM_001134432	AZI2	7	6	17440
NM_001134433	AZI2	7	6	17440
NM_022461	AZI2	8	7	26776
NM_001271650	AZI2	9	8	26776
NM_018644	B3GAT1	7	6	33416
NM_054025	B3GAT1	6	5	33416
NM_007255	B4GALT7	6	5	10229
NM_001243475	B9D1	7	6	40630
NM_001243473	B9D1	6	5	19565
NM_015681	B9D1	7	6	19565
NM_001024372	BAALC	2	1	89614
NM_024812	BAALC	3	2	89614
NM_001261840	BABAM2	12	11	448287
NM_199194	BABAM2	13	12	448287
NM_199193	BABAM2	14	13	448287
NM_199192	BABAM2	13	12	448287
NM_199191	BABAM2	12	11	448287
NM_004899	BABAM2	13	12	448287
NM_138973	BACE1	9	8	30572
NM_138972	BACE1	9	8	30572
NM_138971	BACE1	9	8	30572
NM_012104	BACE1	9	8	30572
NM_001207049	BACE1	8	7	9986
NM_001207048	BACE1	8	7	9986
NM_138992	BACE2	8	7	114735
NM_012105	BACE2	9	8	114735
NM_138991	BACE2	8	7	114735
NM_206866	BACH1	5	4	46734
NM_001186	BACH1	5	4	47251
NM_021813	BACH2	9	8	370317
NM_001170794	BACH2	7	6	370382
NM_032989	BAD	4	3	14878
NM_004322	BAD	3	2	14878
NM_001015049	BAG5	2	1	5776
NM_001015048	BAG5	2	1	6272
NM_004873	BAG5	2	1	5776
NM_001080519	BAHCC1	27	26	59820
NM_001199099	BAIAP3	34	33	15838
NM_001199098	BAIAP3	34	33	15838
NM_001199097	BAIAP3	34	33	15838
NM_001199096	BAIAP3	33	32	13246
NM_003933	BAIAP3	34	33	14939
NM_001286464	BAIAP3	34	33	15838
NM_001188	BAK1	6	5	7749
NM_020064	BARHL1	3	2	7649
NM_020063	BARHL2	3	2	5217
NM_021570	BARX1	4	3	3701
NM_006317	BASP1	2	1	59286
NM_001271606	BASP1	2	1	60024
NM_182648	BAZ1A	26	25	122918
NM_013448	BAZ1A	27	26	122918
NM_032408	BAZ1B	20	19	81889
NM_013449	BAZ2A	29	28	40785
NM_013450	BAZ2B	37	36	297571
NM_001127240	BBC3	4	3	11946
NM_001127242	BBC3	2	1	11946
NM_001127241	BBC3	3	2	11946
NM_014417	BBC3	4	3	10374
NM_024649	BBS1	17	16	22967
NM_031885	BBS2	17	16	35751
NM_033028	BBS4	16	15	52299
NM_001252678	BBS4	15	14	52299
NM_152384	BBS5	12	11	27161
NM_018190	BBS7	18	17	42772
NM_176824	BBS7	19	18	46170
NM_198428	BBS9	23	22	476530
NM_014451	BBS9	21	20	476530
NM_001033605	BBS9	22	21	476530
NM_001033604	BBS9	22	21	476530
NM_001170720	BCAR1	8	7	36920
NM_001170718	BCAR1	7	6	36979
NM_001170717	BCAR1	7	6	22600
NM_001170716	BCAR1	7	6	37781
NM_001170715	BCAR1	7	6	39025
NM_001170719	BCAR1	7	6	19298
NM_001170714	BCAR1	8	7	36979
NM_014567	BCAR1	7	6	22600
NM_001170721	BCAR1	6	5	10054
NM_005872	BCAS2	7	6	14086
NM_001099432	BCAS3	25	24	715029
NM_017679	BCAS3	24	23	715029
NM_005504	BCAT1	11	10	139437
NM_001178094	BCAT1	11	10	92366
NM_001178093	BCAT1	11	10	93053
NM_001178092	BCAT1	9	8	139437
NM_001178091	BCAT1	10	9	139437
NM_000055	BCHE	4	3	64563
NM_001122957	BCKDK	11	10	4499
NM_001271926	BCKDK	10	9	4499
NM_005881	BCKDK	12	11	4499
NM_000633	BCL2	3	2	196036
NM_000657	BCL2	2	1	1428
NM_138578	BCL2L1	3	2	58397
NM_001191	BCL2L1	3	2	58397
NM_020993	BCL7A	6	5	40091
NM_001024808	BCL7A	6	5	40091
NM_004326	BCL9	10	9	84751
NM_198279	BCLAF3	11	10	57404
NM_001123383	BCOR	15	14	126085
NM_001123384	BCOR	14	13	126085
NM_001123385	BCOR	15	14	46222
NM_017745	BCOR	15	14	46222
NM_021946	BCORL1	12	11	52896
NM_021574	BCR	22	21	137674
NM_004327	BCR	23	22	137674
NM_000710	BDKRB1	3	2	8555
NM_001143816	BDNF	2	1	4756
NM_001143814	BDNF	3	2	45595
NM_001709	BDNF	2	1	45595
NM_001143813	BDNF	2	1	45595
NM_001143812	BDNF	2	1	46007
NM_001143811	BDNF	4	3	46160
NM_001143810	BDNF	3	2	46160
NM_001143809	BDNF	2	1	46160
NM_001143808	BDNF	2	1	46160
NM_001143807	BDNF	2	1	64854
NM_001143806	BDNF	2	1	65886
NM_001143805	BDNF	2	1	65886
NM_170733	BDNF	2	1	46740
NM_170731	BDNF	2	1	67165
NM_170735	BDNF	1	0	4756
NM_170734	BDNF	2	1	44774
NM_170732	BDNF	2	1	65886
NM_003766	BECN1	12	11	14162
NM_152731	BEND6	7	6	72371
NM_001139443	BEST1	9	8	13712
NM_004183	BEST1	11	10	14581
NM_001142526	BHLHB9	4	3	31729
NM_001142525	BHLHB9	4	3	31729
NM_001142524	BHLHB9	4	3	31729
NM_001142529	BHLHB9	3	2	6464
NM_001142530	BHLHB9	2	1	6464
NM_001142528	BHLHB9	4	3	31729
NM_001142527	BHLHB9	4	3	31729
NM_030639	BHLHB9	3	2	31729
NM_152414	BHLHE22	1	0	3398
NM_080606	BHLHE23	1	0	1058
NM_003670	BHLHE40	5	4	5770
NM_017418	Bhlhe40	8	7	260828
NM_030762	BHLHE41	5	4	5046
NM_001080512	BICC1	21	20	315943
NM_015250	BICD2	8	7	53440
NM_001003800	BICD2	7	6	53440
NM_207311	BICDL1	9	8	104653
NM_015711	BICRA	15	14	95083
NM_001012271	BIRC5	5	4	11441
NM_001012270	BIRC5	3	2	11441
NM_001168	BIRC5	4	3	11441
NM_001167823	BLCAP	2	1	7136
NM_001167822	BLCAP	2	1	10266
NM_001167820	BLCAP	3	2	10516
NM_001167821	BLCAP	2	1	10317
NM_006698	BLCAP	2	1	10516
NM_001715	BLK	13	12	70589
NM_000057	BLM	22	21	98136
NM_001287248	BLM	22	21	98136
NM_001287246	BLM	23	22	98136
NM_001287247	BLM	20	19	98136
NM_000386	BLMH	12	11	43973
NM_001487	BLOC1S1	4	3	3675
NM_001282436	BLOC1S2	6	5	13436
NM_001001342	BLOC1S2	4	3	13088
NM_001282437	BLOC1S2	5	4	13436
NM_173809	BLOC1S2	5	4	13436
NM_001282438	BLOC1S2	5	4	13102
NM_001282439	BLOC1S2	5	4	13436
NM_212550	BLOC1S3	2	1	3057
NM_018366	BLOC1S4	1	0	1547
NM_201280	BLOC1S5	5	4	50849
NM_001199322	BLOC1S5	6	5	50849
NM_001199323	BLOC1S5	4	3	50849
NM_012388	BLOC1S6	5	4	22494
NM_005180	BMI1	10	9	10277
NM_006129	BMP1	20	19	47189
NM_001199	BMP1	16	15	36345
NM_001718	BMP6	7	6	154952
NM_001204	BMPR2	13	12	191426
NM_203281	BMX	19	18	55754
NM_001721	BMX	19	18	49223
NM_013979	BNIP1	7	6	19947
NM_013980	BNIP1	6	5	19947
NM_013978	BNIP1	5	4	19947
NM_001205	BNIP1	6	5	19947
NM_033254	BOC	20	19	74932
NM_032515	BOK	5	4	15409
NM_016074	BOLA1	2	1	1195
NM_015201	BOP1	16	15	29066
NM_024808	BORA	12	11	28451
NM_001286746	BORA	12	11	28296
NM_001286747	BORA	11	10	28451
NM_001145784	BORCS8	6	5	15689
NM_001145783	BORCS8	4	3	10717
NM_182641	BPTF	28	27	158716
NM_004459	BPTF	30	29	158716
NM_004333	BRAF	18	17	190753
NM_006768	BRAP	12	11	43842
NM_000059	BRCA2	27	26	84194
NM_014577	BRD1	12	11	51517
NM_001199456	BRD2	12	11	8423
NM_005104	BRD2	13	12	12847
NM_001113182	BRD2	13	12	10619
NM_001199455	BRD2	13	12	9912
NM_007371	BRD3	12	11	37697
NM_014299	BRD4	12	11	33417
NM_058243	BRD4	20	19	42963
NM_006696	BRD8	22	21	21787
NM_001164326	BRD8	20	19	21787
NM_139199	BRD8	27	26	38901
NM_001242787	BRF1	18	17	106293
NM_001242786	BRF1	18	17	106293
NM_145685	BRF1	14	13	38601
NM_001519	BRF1	18	17	91708
NM_001242790	BRF1	4	3	44808
NM_001242789	BRF1	13	12	40120
NM_001242788	BRF1	17	16	91708
NM_018310	BRF2	4	3	6035
NM_015379	BRI3	3	2	9862
NM_001159491	BRI3	3	2	11298
NM_014618	BRINP1	8	7	202833
NM_021165	BRINP2	8	7	110927
NM_199051	BRINP3	8	7	379964
NM_032043	BRIP1	20	19	184375
NM_001727	BRS3	3	2	4475
NM_001282218	BRSK2	20	19	52248
NM_001256630	BRSK2	20	19	51539
NM_001256629	BRSK2	20	19	72792
NM_001256627	BRSK2	20	19	72792
NM_003957	BRSK2	20	19	72792
NM_001122955	BSCL2	11	10	17447
NM_032667	BSCL2	11	10	16055
NM_001130702	BSCL2	10	9	16055
NM_003458	BSN	12	11	117062
NM_001098169	BSX	3	2	4024
NM_014962	BTBD3	4	3	8732
NM_001282552	BTBD3	4	3	35874
NM_001282551	BTBD3	5	4	8732
NM_001282550	BTBD3	5	4	34104
NM_001282554	BTBD3	4	3	8732
NM_181443	BTBD3	5	4	35874
NM_033271	BTBD6	5	4	2553
NM_001037637	BTF3	6	5	7200
NM_001207	BTF3	6	5	7200
NM_001731	BTG1	2	1	5621
NM_006763	BTG2	2	1	4067
NM_000061	BTK	19	18	36779
NM_001287345	BTK	17	16	36779
NM_001287344	BTK	19	18	41351
NM_001256856	BTRC	14	13	203290
NM_033637	BTRC	15	14	203290
NM_003939	BTRC	14	13	203290
NM_001211	BUB1B	23	22	60129
NM_001007793	BUB3	8	7	11128
NM_004725	BUB3	8	7	11128
NM_004053	BYSL	7	6	11821
NM_001207068	BZW1	12	11	9912
NM_001207067	BZW1	12	11	12302
NM_014670	BZW1	12	11	12302
NM_001207069	BZW1	12	11	11663
NM_001159767	BZW2	12	11	60391
NM_014038	BZW2	12	11	60391
NM_021640	C12orf10	7	6	7497
NM_001286195	C12orf43	6	5	14082
NM_001286197	C12orf43	5	4	14082
NM_001286196	C12orf43	6	5	14082
NM_001286191	C12orf43	6	5	14082
NM_001286192	C12orf43	6	5	14082
NM_001286198	C12orf43	7	6	14082
NM_022895	C12orf43	6	5	14082
NM_001142469	C16orf45	6	5	85995
NM_033201	C16orf45	6	5	153793
NM_015991	C1QA	3	2	3059
NM_006688	C1QL1	2	1	8585
NM_001286537	C2orf49	5	4	11457
NM_024093	C2orf49	4	3	11457
NM_001029883	C2orf71	2	1	12573
NM_000064	C3	41	40	42818
NM_001735	C5	41	40	97942
NM_001736	C5AR1	2	1	12225
NM_001216	CA9	11	10	7241
NM_016289	CAB39	9	8	108235
NM_001130849	CAB39	9	8	107529
NM_001130850	CAB39	9	8	107529
NM_001201429	CABIN1	36	35	166833
NM_001199281	CABIN1	37	36	166778
NM_012295	CABIN1	37	36	166833
NM_031205	CABP1	7	6	16819
NM_001033677	CABP1	6	5	26707
NM_004276	CABP1	6	5	16819
NM_145200	CABP4	6	5	6429
NM_182527	CABP7	5	4	11478
NM_023035	CACNA1A	47	46	300020
NM_001127222	CACNA1A	47	46	300020
NM_001174080	CACNA1A	47	46	300020
NM_000068	CACNA1A	47	46	300020
NM_001127221	CACNA1A	47	46	300020
NM_000718	CACNA1B	46	45	246837
NM_001243812	CACNA1B	46	45	246837
NM_001129840	CACNA1C	47	46	644701
NM_001129831	CACNA1C	48	47	644701
NM_001129830	CACNA1C	48	47	644701
NM_001129841	CACNA1C	47	46	644701
NM_001129836	CACNA1C	47	46	644701
NM_001129837	CACNA1C	46	45	644701
NM_199460	CACNA1C	50	49	644701
NM_001129833	CACNA1C	47	46	644701
NM_001129846	CACNA1C	46	45	644701
NM_001129843	CACNA1C	47	46	644701
NM_001129832	CACNA1C	48	47	644701
NM_001129844	CACNA1C	47	46	644701
NM_001129842	CACNA1C	47	46	644701
NM_001129835	CACNA1C	47	46	644701
NM_001167624	CACNA1C	48	47	644701
NM_001167623	CACNA1C	47	46	644701
NM_001129839	CACNA1C	46	45	644701
NM_001129838	CACNA1C	46	45	644701
NM_001129829	CACNA1C	47	46	644701
NM_001129827	CACNA1C	49	48	644701
NM_001129834	CACNA1C	47	46	644701
NM_000719	CACNA1C	47	46	644701
NM_001167625	CACNA1C	47	46	644701
NM_001128839	CACNA1D	46	45	317418
NM_001128840	CACNA1D	48	47	317418
NM_000720	CACNA1D	49	48	317418
NM_000721	CACNA1E	47	46	323237
NM_001205294	CACNA1E	46	45	323237
NM_001205293	CACNA1E	48	47	323237
NM_001256789	CACNA1F	48	47	28312
NM_001256790	CACNA1F	48	47	28312
NM_005183	CACNA1F	48	47	28312
NM_018896	CACNA1G	38	37	66405
NM_001256360	CACNA1G	35	34	66405
NM_001256359	CACNA1G	36	35	66405
NM_198383	CACNA1G	36	35	66405
NM_198379	CACNA1G	35	34	66405
NM_198396	CACNA1G	36	35	66405
NM_198385	CACNA1G	37	36	66405
NM_198384	CACNA1G	36	35	66405
NM_198380	CACNA1G	36	35	66405
NM_198378	CACNA1G	35	34	66405
NM_198377	CACNA1G	37	36	66405
NM_198376	CACNA1G	35	34	66405
NM_198388	CACNA1G	34	33	66405
NM_001256333	CACNA1G	37	36	66405
NM_001256330	CACNA1G	35	34	66405
NM_001256361	CACNA1G	35	34	66405
NM_001256332	CACNA1G	35	34	66405
NM_001256331	CACNA1G	35	34	66405
NM_001256329	CACNA1G	36	35	66405
NM_001256328	CACNA1G	35	34	66405
NM_001256327	CACNA1G	36	35	66405
NM_001256326	CACNA1G	36	35	66405
NM_001256325	CACNA1G	36	35	66405
NM_001256324	CACNA1G	36	35	66405
NM_001256334	CACNA1G	36	35	66405
NM_198387	CACNA1G	34	33	66405
NM_198386	CACNA1G	35	34	66405
NM_198382	CACNA1G	35	34	66405
NM_021098	CACNA1H	35	34	68533
NM_001005407	CACNA1H	34	33	68533
NM_021096	CACNA1I	37	36	118984
NM_001003406	CACNA1I	36	35	118984
NM_201597	CACNB2	14	13	401084
NM_201572	CACNB2	14	13	400948
NM_201571	CACNB2	14	13	400948
NM_201596	CACNB2	14	13	401084
NM_201593	CACNB2	14	13	401084
NM_201570	CACNB2	13	12	141177
NM_000724	CACNB2	13	12	281106
NM_201590	CACNB2	13	12	201076
NM_001167945	CACNB2	14	13	400948
NM_006078	CACNG2	4	3	141776
NM_145811	CACNG5	5	4	8006
NM_031895	CACNG8	4	3	27181
NM_021231	CACTIN	11	10	16172
NM_001080543	CACTIN	10	9	16188
NM_004341	CAD	44	43	26398
NM_001098517	CADM1	9	8	330898
NM_014333	CADM1	10	9	330898
NM_153184	CADM2	10	9	347949
NM_001256505	CADM2	10	9	569372
NM_001256502	CADM2	11	10	569372
NM_001167675	CADM2	10	9	1115448
NM_001256504	CADM2	11	10	569372
NM_001256503	CADM2	10	9	569372
NM_001167674	CADM2	10	9	1115448
NM_183394	CADPS	28	27	477045
NM_183393	CADPS	27	26	477045
NM_003716	CADPS	30	29	477045
NM_017954	CADPS2	30	29	568337
NM_001009571	CADPS2	28	27	568337
NM_001167940	CADPS2	30	29	568337
NM_004929	CALB1	11	10	24271
NM_001740	CALB2	11	10	31728
NM_007088	CALB2	9	8	31728
NM_001033953	CALCA	5	4	5619
NM_001033952	CALCA	4	3	3786
NM_001741	CALCA	4	3	3786
NM_033157	CALD1	15	14	191318
NM_033139	CALD1	13	12	79331
NM_033138	CALD1	15	14	191318
NM_033140	CALD1	12	11	79331
NM_004342	CALD1	14	13	191318
NM_006888	CALM1	6	5	11294
NM_001743	CALM2	6	5	16521
NM_031468	CALN1	7	6	632886
NM_001017440	CALN1	6	5	557734
NM_004343	CALR	9	8	5892
NM_020397	CAMK1D	10	9	476556
NM_153498	CAMK1D	11	10	480152
NM_020439	CAMK1G	13	12	30241
NM_015981	CAMK2A	19	18	70351
NM_171825	CAMK2A	18	17	70351
NM_172129	CAMK2D	18	17	304741
NM_001221	CAMK2D	19	18	310897
NM_172128	CAMK2D	18	17	310897
NM_172115	CAMK2D	17	16	304741
NM_172114	CAMK2D	18	17	304741
NM_172127	CAMK2D	18	17	310897
NM_001204492	CAMK2G	21	20	62092
NM_001222	CAMK2G	19	18	62092
NM_172173	CAMK2G	20	19	62092
NM_172171	CAMK2G	21	20	62092
NM_172170	CAMK2G	20	19	62092
NM_172169	CAMK2G	21	20	62092
NM_033259	CAMK2N2	2	1	2250
NM_001744	CAMK4	11	10	260803
NM_032294	CAMKK1	16	15	32722
NM_172206	CAMKK1	16	15	30422
NM_172207	CAMKK1	16	15	27888
NM_006549	CAMKK2	17	16	60618
NM_001270486	CAMKK2	16	15	36895
NM_001270485	CAMKK2	17	16	59063
NM_172216	CAMKK2	16	15	60618
NM_172215	CAMKK2	16	15	54722
NM_172214	CAMKK2	17	16	54722
NM_172226	CAMKK2	16	15	59063
NM_153499	CAMKK2	16	15	60618
NM_153500	CAMKK2	15	14	60618
NM_024046	CAMKV	11	10	11949
NM_015447	CAMSAP1	17	16	98674
NM_015215	CAMTA1	23	22	984384
NM_001242701	CAMTA1	4	3	102879
NM_001195563	CAMTA1	4	3	86725
NM_001171167	CAMTA2	23	22	19380
NM_001171166	CAMTA2	21	20	19675
NM_001171168	CAMTA2	22	21	19380
NM_015099	CAMTA2	23	22	19675
NM_001024649	CANX	15	14	32711
NM_001746	CANX	15	14	32711
NM_001105530	CAP1	13	12	32068
NM_006367	CAP1	13	12	32068
NM_006366	CAP2	13	12	164289
NM_024344	CAPN3	23	22	52819
NM_000070	CAPN3	24	23	52819
NM_173089	CAPN3	9	8	7540
NM_173088	CAPN3	13	12	9929
NM_173087	CAPN3	21	20	52819
NM_173090	CAPN3	10	9	7540
NM_014296	CAPN7	21	20	46692
NM_203364	CAPRIN1	18	17	47379
NM_005898	CAPRIN1	19	18	50929
NM_001002259	CAPRIN2	18	17	44964
NM_001206856	CAPRIN2	17	16	44964
NM_023925	CAPRIN2	17	16	44964
NM_032156	CAPRIN2	18	17	44964
NM_006136	CAPZA2	10	9	56752
NM_001282162	CAPZB	9	8	145936
NM_001206541	CAPZB	9	8	146870
NM_001206540	CAPZB	10	9	146870
NM_004930	CAPZB	9	8	146870
NM_199141	CARM1	16	15	51197
NM_001014437	CARS	23	22	56531
NM_001194997	CARS	23	22	56531
NM_001751	CARS	22	21	56531
NM_139273	CARS	22	21	56531
NM_001126055	CASK	25	24	408100
NM_001126054	CASK	26	25	408100
NM_003688	CASK	27	26	408100
NM_020764	CASKIN1	20	19	19283
NM_032991	CASP3	7	6	21781
NM_004346	CASP3	8	7	21781
NM_001278054	CASP9	5	4	33046
NM_032996	CASP9	9	8	33391
NM_001229	CASP9	9	8	33046
NM_001164116	CASS4	7	6	47230
NM_001164115	CASS4	5	4	47084
NM_001164114	CASS4	6	5	47084
NM_020356	CASS4	6	5	47084
NM_001079843	CASZ1	21	20	160069
NM_017766	CASZ1	16	15	149472
NM_198137	CATSPER4	10	9	11916
NM_152769	CBARP	9	8	8045
NM_001032999	CBFA2T2	11	10	159911
NM_001039709	CBFA2T2	11	10	87668
NM_005093	CBFA2T2	12	11	87668
NM_022845	CBFB	6	5	71910
NM_001755	CBFB	6	5	71910
NM_005188	CBL	16	15	101875
NM_001178009	CBS	18	17	23173
NM_001178008	CBS	17	16	23173
NM_000071	CBS	17	16	22741
NM_006807	CBX1	5	4	31148
NM_001127228	CBX1	5	4	31471
NM_007276	CBX3	6	5	12398
NM_016587	CBX3	6	5	11905
NM_175709	CBX7	6	5	21761
NM_015373	CBY1	5	4	17199
NM_001002880	CBY1	6	5	17199
NM_017721	CC2D1A	29	28	24739
NM_032449	CC2D1B	24	23	15614
NM_021174	CCAR2	21	20	15446
NM_033212	CCDC102A	9	8	24389
NM_001258398	CCDC103	4	3	3969
NM_001258397	CCDC103	4	3	3969
NM_001258396	CCDC103	4	3	3969
NM_001258395	CCDC103	4	3	3969
NM_001258399	CCDC103	4	3	3969
NM_213607	CCDC103	4	3	3969
NM_014157	CCDC113	9	8	33896
NM_001142302	CCDC113	8	7	33896
NM_144577	CCDC114	14	13	23625
NM_024821	CCDC134	7	6	25627
NM_001201372	CCDC136	10	9	30725
NM_022742	CCDC136	18	17	30139
NM_199287	CCDC137	6	5	7177
NM_173648	CCDC141	24	23	220304
NM_001171637	CCDC148	8	7	168167
NM_138803	CCDC148	14	13	285398
NM_173550	CCDC171	26	25	418802
NM_016474	CCDC174	11	10	20915
NM_020893	CCDC180	37	36	69669
NM_021179	CCDC181	6	5	32558
NM_018017	CCDC186	16	15	52392
NM_001378188	CCDC187	27	26	56929
NM_152499	CCDC24	9	8	4920
NM_024296	CCDC28B	6	5	4791
NM_031455	CCDC3	3	2	105081
NM_001282658	CCDC3	7	6	203150
NM_181426	CCDC39	20	19	65489
NM_001243342	CCDC40	18	17	54191
NM_017950	CCDC40	20	19	63983
NM_144609	CCDC43	5	4	12362
NM_001099225	CCDC43	4	3	12362
NM_001017928	CCDC58	5	4	23640
NM_001286957	CCDC65	8	7	17468
NM_033124	CCDC65	8	7	17468
NM_001080433	CCDC85A	6	5	202053
NM_006848	CCDC85B	1	0	1233
NM_001144995	CCDC85C	6	5	93126
NM_001135597	CCDC88A	33	32	132081
NM_001254943	CCDC88A	34	33	132081
NM_018084	CCDC88A	32	31	132081
NM_001080414	CCDC88C	30	29	146523
NM_025140	CCDC92	5	4	36210
NM_019044	CCDC93	24	23	98687
NM_153376	CCDC96	1	0	2154
NM_152638	CCER1	1	0	2963
NM_000729	CCK	5	4	8346
NM_001174138	CCK	3	2	6123
NM_002982	CCL2	3	2	1926
NM_001237	CCNA2	8	7	7491
NM_031966	CCNB1	9	8	11235
NM_004701	CCNB2	9	8	19962
NM_033031	CCNB3	12	11	67373
NM_033670	CCNB3	8	7	67373
NM_001013399	CCNC	12	11	26429
NM_005190	CCNC	12	11	26429
NM_053056	CCND1	5	4	13371
NM_001759	CCND2	5	4	31622
NM_001238	CCNE1	12	11	12316
NM_057749	CCNE2	12	11	15031
NM_001761	CCNF	17	16	29466
NM_199246	CCNG1	8	7	7447
NM_004060	CCNG1	7	6	7447
NM_004354	CCNG2	8	7	12858
NM_001199189	CCNH	9	8	18644
NM_001239	CCNH	9	8	18773
NM_006835	CCNI	7	6	27950
NM_019084	CCNJ	6	5	17468
NM_001134376	CCNJ	6	5	17468
NM_001134375	CCNJ	6	5	17468
NM_001099402	CCNK	11	10	30115
NM_021147	CCNO	3	2	2529
NM_001130997	CCNQ	5	4	11251
NM_152274	CCNQ	5	4	11251
NM_001240	CCNT1	9	8	28542
NM_001277842	CCNT1	8	7	28542
NM_001241	CCNT2	10	9	40525
NM_058241	CCNT2	9	8	40525
NM_001199022	CCP110	15	14	29551
NM_014711	CCP110	15	14	29551
NM_005508	CCR4	2	1	3339
NM_145257	CCSAP	4	3	21938
NM_001198842	CCT2	16	15	15897
NM_006431	CCT2	16	15	16151
NM_005998	CCT3	14	13	29456
NM_001008800	CCT3	12	11	29456
NM_001256721	CCT4	13	12	20546
NM_006430	CCT4	14	13	20546
NM_012073	CCT5	11	10	16221
NM_001009570	CCT7	7	6	18788
NM_006429	CCT7	12	11	18788
NM_001166285	CCT7	13	12	18788
NM_001166284	CCT7	10	9	18788
NM_006585	CCT8	15	14	17477
NM_001282908	CCT8	15	14	17477
NM_001282909	CCT8	14	13	17477
NM_001282907	CCT8	16	15	17477
NM_001159588	CD109	32	31	132535
NM_133493	CD109	33	32	132529
NM_001159587	CD109	33	32	132535
NM_001025109	CD34	8	7	24802
NM_001773	CD34	8	7	24802
NM_001780	CD63	8	7	3697
NM_001257392	CD63	7	6	2911
NM_001257401	CD63	7	6	2347
NM_001267698	CD63	8	7	3536
NM_001257390	CD63	8	7	3209
NM_001257389	CD63	8	7	4232
NM_001257391	CD63	7	6	3041
NM_001257400	CD63	7	6	2459
NM_004356	CD81	8	7	20104
NM_001024844	CD82	9	8	54176
NM_002231	CD82	10	9	54176
NM_001769	CD9	8	7	37957
NM_005816	CD96	14	13	110282
NM_198196	CD96	15	14	110282
NM_138477	CDAN1	28	27	13659
NM_033313	CDC14A	11	10	132905
NM_033312	CDC14A	15	14	147000
NM_003672	CDC14A	16	15	167812
NM_033331	CDC14B	14	13	119719
NM_003671	CDC14B	13	12	119719
NM_001077181	CDC14B	14	13	66810
NM_001078645	CDC16	18	17	37790
NM_003903	CDC16	19	18	37790
NM_001255	CDC20	11	10	4249
NM_201567	CDC25A	14	13	31135
NM_001789	CDC25A	15	14	31135
NM_021872	CDC25B	15	14	10384
NM_001287522	CDC25B	15	14	10384
NM_001287524	CDC25B	12	11	6061
NM_001287520	CDC25B	16	15	10384
NM_001287516	CDC25B	16	15	19351
NM_021873	CDC25B	16	15	10384
NM_001287518	CDC25B	15	14	19351
NM_001287519	CDC25B	16	15	10384
NM_004358	CDC25B	16	15	10384
NM_001287517	CDC25B	16	15	19351
NM_001790	CDC25C	14	13	46614
NM_022809	CDC25C	11	10	46614
NM_001287583	CDC25C	14	13	53092
NM_001287582	CDC25C	14	13	46614
NM_001114091	CDC27	19	18	71356
NM_001256	CDC27	19	18	71356
NM_015891	CDC40	15	14	51800
NM_001039802	CDC42	7	6	40318
NM_044472	CDC42	6	5	38178
NM_001791	CDC42	6	5	40318
NM_152243	CDC42EP1	3	2	8941
NM_006779	CDC42EP2	2	1	7613
NM_020239	CDC42SE1	5	4	8680
NM_001038707	CDC42SE1	6	5	8680
NM_001178011	CDC45	18	17	40788
NM_001178010	CDC45	20	19	40788
NM_003504	CDC45	19	18	40788
NM_001254	CDC6	12	11	15269
NM_017955	CDCA4	2	1	11517
NM_145701	CDCA4	3	2	11517
NM_031942	CDCA7	10	9	14159
NM_145810	CDCA7	9	8	14159
NM_001256875	CDCA8	10	9	17320
NM_018101	CDCA8	11	10	17320
NM_001797	CDH11	13	12	175238
NM_001167667	CDH18	13	12	515200
NM_004934	CDH18	13	12	515200
NM_001792	CDH2	16	15	226517
NM_031891	CDH20	11	10	64592
NM_022124	CDH23	68	67	419015
NM_001171930	CDH23	31	30	335792
NM_001171931	CDH23	25	24	310575
NM_052836	CDH23	13	12	250530
NM_001171932	CDH23	11	10	220673
NM_001171933	CDH23	23	22	20178
NM_001171936	CDH23	4	3	4066
NM_001171934	CDH23	22	21	20178
NM_001171935	CDH23	5	4	4066
NM_144985	CDH24	13	12	10479
NM_022478	CDH24	14	13	10479
NM_001252338	CDH4	15	14	441198
NM_001794	CDH4	16	15	688193
NM_001252339	CDH4	15	14	340858
NM_004932	CDH6	12	11	135493
NM_033646	CDH7	12	11	130689
NM_004361	CDH7	12	11	130019
NM_033100	CDHR1	17	16	24063
NM_001171971	CDHR1	17	16	24987
NM_001199055	CDIP1	6	5	28141
NM_001199054	CDIP1	6	5	27796
NM_001199056	CDIP1	6	5	28141
NM_013399	CDIP1	6	5	28141
NM_006319	CDIPT	6	5	4934
NM_001286586	CDIPT	6	5	4934
NM_001286585	CDIPT	5	4	4934
NM_001170407	CDK1	4	3	8617
NM_001170406	CDK1	4	3	8740
NM_001786	CDK1	8	7	16400
NM_033379	CDK1	7	6	16400
NM_001160367	CDK10	13	12	9698
NM_052988	CDK10	13	12	9698
NM_052987	CDK10	13	12	9698
NM_001098533	CDK10	13	12	9698
NM_015083	CDK12	14	13	73056
NM_016507	CDK12	14	13	73056
NM_031267	CDK13	14	13	146776
NM_003718	CDK13	14	13	146776
NM_001287137	CDK14	13	12	500777
NM_001287135	CDK14	15	14	614231
NM_012395	CDK14	14	13	501195
NM_001287136	CDK14	14	13	500777
NM_001170464	CDK17	16	15	122329
NM_002595	CDK17	17	16	122329
NM_015076	CDK19	13	12	205233
NM_052827	CDK2	6	5	6014
NM_001798	CDK2	7	6	6014
NM_001270434	CDK2AP1	4	3	7286
NM_001270433	CDK2AP1	4	3	9266
NM_004642	CDK2AP1	4	3	11172
NM_000075	CDK4	8	7	4722
NM_001164410	CDK5	11	10	4152
NM_004935	CDK5	12	11	4155
NM_003885	CDK5R1	2	1	4168
NM_003936	CDK5R2	1	0	2529
NM_001011649	CDK5RAP2	37	36	191303
NM_018249	CDK5RAP2	38	37	191303
NM_001272039	CDK5RAP2	35	34	191303
NM_001278198	CDK5RAP3	13	12	10832
NM_001278197	CDK5RAP3	14	13	11260
NM_001278217	CDK5RAP3	13	12	10832
NM_001278216	CDK5RAP3	12	11	10832
NM_176096	CDK5RAP3	14	13	10832
NM_001799	CDK7	12	11	42637
NM_001261	CDK9	7	6	4749
NM_001282236	CDKL1	9	8	65480
NM_004196	CDKL1	9	8	66335
NM_016508	CDKL3	9	8	59075
NM_001113575	CDKL3	13	12	68652
NM_003159	CDKL5	21	20	228026
NM_001037343	CDKL5	22	21	211407
NM_004064	CDKN1B	3	2	5114
NM_000076	CDKN1C	3	2	2549
NM_001122631	CDKN1C	4	3	2549
NM_001122630	CDKN1C	4	3	2549
NM_001195132	CDKN2A	4	3	7383
NM_058197	CDKN2A	3	2	7077
NM_058195	CDKN2A	3	2	26741
NM_000077	CDKN2A	3	2	7383
NM_017632	CDKN2AIP	3	2	3262
NM_001800	CDKN2D	2	1	2495
NM_079421	CDKN2D	3	2	2519
NM_001029954	CDNF	4	3	18734
NM_016952	CDON	20	19	106476
NM_001243597	CDON	20	19	106476
NM_030928	CDT1	10	9	5482
NM_005760	CEBPZ	16	15	29967
NM_031413	CECR2	18	17	77219
NM_001025596	CELF1	13	12	23089
NM_006560	CELF1	14	13	87305
NM_198700	CELF1	14	13	28586
NM_001172640	CELF1	13	12	23089
NM_001172639	CELF1	16	15	58053
NM_006561	CELF2	15	14	318781
NM_001025077	CELF2	14	13	331415
NM_001025076	CELF2	15	14	171681
NM_001083591	CELF2	15	14	171681
NM_001172648	CELF3	13	12	16260
NM_001172649	CELF3	12	11	16350
NM_007185	CELF3	13	12	16758
NM_001025089	CELF4	12	11	322994
NM_001025088	CELF4	13	12	322994
NM_001025087	CELF4	13	12	322994
NM_020180	CELF4	13	12	322994
NM_001172673	CELF5	12	11	72373
NM_021938	CELF5	13	12	72374
NM_052840	CELF6	13	12	35459
NM_001172685	CELF6	11	10	21590
NM_001172684	CELF6	12	11	35221
NM_014246	CELSR1	35	34	176338
NM_001408	CELSR2	34	33	25739
NM_001407	CELSR3	35	34	26454
NM_016564	CEND1	2	1	3018
NM_016343	CENPF	20	19	61384
NM_022909	CENPH	9	8	20811
NM_001267038	CENPK	11	10	45404
NM_022145	CENPK	11	10	45404
NM_018132	CENPQ	9	8	29726
NM_024629	CENPU	13	12	40069
NM_001286524	CENPW	3	2	9088
NM_001286525	CENPW	3	2	9088
NM_001012507	CENPW	3	2	9088
NM_001166226	CEP120	20	19	78709
NM_153223	CEP120	21	20	78709
NM_020802	CEP126	11	10	86049
NM_025114	CEP290	54	53	93205
NM_001257158	CEP41	10	9	47441
NM_018718	CEP41	11	10	47441
NM_001257159	CEP41	9	8	47441
NM_001257160	CEP41	3	2	22178
NM_001243776	CEP57	12	11	42234
NM_014679	CEP57	11	10	42234
NM_001243777	CEP57	10	9	42234
NM_001042400	CEP63	13	12	78975
NM_001042384	CEP63	12	11	89282
NM_025180	CEP63	16	15	78825
NM_001042383	CEP63	12	11	79297
NM_032171	CEP78	15	14	30994
NM_001098802	CEP78	16	15	30994
NM_022766	CERK	13	12	53847
NM_001030313	CERKL	11	10	120435
NM_001030312	CERKL	10	9	120435
NM_001160277	CERKL	13	12	120435
NM_001030311	CERKL	14	13	120435
NM_201548	CERKL	13	12	120435
NM_198207	CERS1	6	5	18237
NM_021267	CERS1	8	7	27594
NM_022075	CERS2	11	10	9832
NM_181746	CERS2	11	10	9832
NM_178842	CERS3	13	12	144327
NM_024552	CERS4	12	11	53089
NM_147190	CERS5	10	9	38229
NM_001281731	CERS5	11	10	38229
NM_203463	CERS6	10	9	318887
NM_001256126	CERS6	11	10	318887
NM_004066	CETN1	1	0	1157
NM_004344	CETN2	5	4	3432
NM_182628	CFAP100	17	16	41618
NM_173528	CFAP161	7	6	14874
NM_013242	CFAP20	6	5	15801
NM_001031743	CFAP206	13	12	56503
NM_001271049	CFAP221	24	23	112231
NM_001206997	CFAP299	7	6	628038
NM_152770	CFAP299	6	5	628038
NM_001282761	CFAP36	11	10	25487
NM_080667	CFAP36	10	9	25487
NM_025145	CFAP43	38	37	102476
NM_018338	CFAP44	21	20	78651
NM_001164496	CFAP44	35	34	154586
NM_012337	CFAP45	12	11	27754
NM_145054	CFAP52	14	13	66834
NM_001080556	CFAP52	13	12	66834
NM_001195831	CFAP57	24	23	82030
NM_152498	CFAP57	11	10	38550
NM_001167965	CFAP57	11	10	38550
NM_194302	CFAP65	35	34	38707
NM_001278296	CFAP65	12	11	15005
NM_001278295	CFAP65	13	12	15005
NM_152389	CFAP65	4	3	7861
NM_145170	CFAP70	28	27	105103
NM_020827	CFAP97	5	4	44365
NM_006324	CFDP1	7	6	139781
NM_000186	CFH	22	21	95628
NM_001014975	CFH	10	9	49689
NM_005507	CFL1	4	3	3521
NM_021914	CFL2	4	3	3437
NM_001243645	CFL2	4	3	4175
NM_138638	CFL2	4	3	4443
NM_002621	CFP	10	9	6094
NM_001145252	CFP	9	8	5759
NM_138441	CGAS	5	4	27189
NM_001252335	CGNL1	20	19	174224
NM_032866	CGNL1	19	18	174224
NM_005483	CHAF1A	15	14	40736
NM_005441	CHAF1B	14	13	31438
NM_001142934	CHAT	16	15	51069
NM_001142933	CHAT	16	15	51069
NM_020986	CHAT	15	14	51998
NM_020985	CHAT	16	15	51998
NM_020984	CHAT	15	14	56011
NM_020549	CHAT	15	14	51069
NM_001142929	CHAT	15	14	51069
NM_144636	CHCHD4	4	3	12796
NM_001098502	CHCHD4	3	2	12796
NM_001270	CHD1	35	34	71332
NM_001042572	CHD2	13	12	48914
NM_001271	CHD2	39	38	127688
NM_005852	CHD3	39	38	23908
NM_001005273	CHD3	40	39	23908
NM_001005271	CHD3	40	39	27954
NM_001273	CHD4	40	39	37305
NM_015557	CHD5	42	41	78349
NM_032221	CHD6	37	36	216392
NM_017780	CHD7	38	37	189264
NM_001170629	CHD8	37	36	46516
NM_020920	CHD8	38	37	52106
NM_018397	CHDH	9	8	30098
NM_001114122	CHEK1	13	12	32013
NM_001114121	CHEK1	14	13	51121
NM_001244846	CHEK1	12	11	32013
NM_001274	CHEK1	13	12	30793
NM_145862	CHEK2	14	13	54093
NM_007194	CHEK2	15	14	54093
NM_001257387	CHEK2	16	15	54093
NM_001005735	CHEK2	16	15	54093
NM_001161347	CHFR	16	15	47268
NM_001161346	CHFR	18	17	47268
NM_001161345	CHFR	18	17	47268
NM_001161344	CHFR	18	17	47268
NM_018223	CHFR	18	17	47268
NM_001275	CHGA	8	7	12195
NM_021797	CHIA	9	8	29716
NM_201653	CHIA	12	11	29716
NM_001258005	CHIA	11	10	29716
NM_001258004	CHIA	12	11	29716
NM_001258003	CHIA	10	9	29716
NM_001258002	CHIA	8	7	29716
NM_001258001	CHIA	11	10	29716
NM_001040623	CHIA	10	9	29716
NM_006614	CHL1	28	27	212820
NM_001253387	CHL1	27	26	212820
NM_001253388	CHL1	25	24	89733
NM_001083314	CHMP1A	6	5	13356
NM_002768	CHMP1A	7	6	13356
NM_014043	CHMP2B	6	5	28287
NM_001244644	CHMP2B	5	4	28287
NM_176812	CHMP4B	5	4	43065
NM_001195536	CHMP5	7	6	17192
NM_016410	CHMP5	8	7	17192
NM_001822	CHN1	13	12	205941
NM_001025201	CHN1	13	12	206067
NM_001206602	CHN1	7	6	48306
NM_004067	CHN2	13	12	319825
NM_001039936	CHN2	7	6	34460
NM_012124	CHORDC1	11	10	22937
NM_001144073	CHORDC1	10	9	22937
NM_145234	CHRDL1	12	11	121994
NM_001143983	CHRDL1	10	9	122204
NM_001143982	CHRDL1	12	11	122204
NM_001143981	CHRDL1	12	11	122204
NM_015424	CHRDL2	12	11	34755
NM_001278473	CHRDL2	11	10	34755
NM_000738	CHRM1	2	1	12863
NM_012125	CHRM5	3	2	96200
NM_020402	CHRNA10	5	4	5799
NM_001199279	CHRNA6	5	4	16151
NM_004198	CHRNA6	6	5	16151
NM_017581	CHRNA9	5	4	19890
NM_000750	CHRNB4	6	5	16953
NM_001256567	CHRNB4	5	4	16953
NM_003654	CHST1	4	3	17969
NM_004854	CHST10	7	6	25810
NM_018641	CHST12	2	1	31023
NM_001243795	CHST12	2	1	31023
NM_001243794	CHST12	2	1	31023
NM_130468	CHST14	1	0	2199
NM_004267	CHST2	2	1	4240
NM_014918	CHSY1	3	2	76211
NM_022092	CHTF18	22	21	9454
NM_001204064	CHURC1	3	2	21007
NM_001204063	CHURC1	4	3	21007
NM_145165	CHURC1	4	3	21007
NM_020313	CIAPIN1	9	8	19284
NM_006383	CIB2	6	5	26931
NM_001271889	CIB2	4	3	26931
NM_001271888	CIB2	5	4	26931
NM_000246	CIITA	20	19	47787
NM_001286403	CIITA	18	17	47787
NM_001286402	CIITA	20	19	47787
NM_001280	CIRBP	7	6	3906
NM_001008388	CISD2	3	2	23830
NM_001168389	CITED2	2	1	1960
NM_001168388	CITED2	2	1	2109
NM_006079	CITED2	2	1	2397
NM_133467	CITED4	1	0	1292
NM_014756	CKAP5	43	42	102777
NM_001008938	CKAP5	44	43	102777
NM_001823	CKB	8	7	3203
NM_001826	CKS1B	3	2	4609
NM_001827	CKS2	3	2	5507
NM_015282	CLASP1	39	38	311702
NM_001207051	CLASP1	38	37	311702
NM_001142274	CLASP1	38	37	311702
NM_001142273	CLASP1	39	38	311702
NM_001207044	CLASP2	33	32	163196
NM_015097	CLASP2	39	38	221968
NM_000083	CLCN1	23	22	35880
NM_001243372	CLCN3	12	11	102668
NM_001829	CLCN3	13	12	102668
NM_001243374	CLCN3	12	11	63127
NM_173872	CLCN3	14	13	102668
NM_001256959	CLCN6	22	21	37050
NM_001286	CLCN6	23	22	37050
NM_001040181	CLDND1	5	4	7595
NM_019895	CLDND1	6	5	7595
NM_001040199	CLDND1	5	4	7595
NM_001040200	CLDND1	4	3	7595
NM_001040183	CLDND1	5	4	7595
NM_001040182	CLDND1	6	5	7595
NM_001130675	CLGN	16	15	39210
NM_004362	CLGN	15	14	39210
NM_002956	CLIP1	25	24	151137
NM_198240	CLIP1	24	23	151137
NM_001247997	CLIP1	26	25	151137
NM_001199570	CLIP3	13	12	18013
NM_015526	CLIP3	14	13	18237
NM_001287527	CLIP4	16	15	68389
NM_001287528	CLIP4	15	14	77041
NM_024692	CLIP4	16	15	68389
NM_001286105	CLN3	13	12	14804
NM_000086	CLN3	15	14	14805
NM_001042432	CLN3	16	15	15025
NM_001286104	CLN3	15	14	15024
NM_001286109	CLN3	14	13	25431
NM_001286110	CLN3	14	13	14804
NM_006493	CLN5	4	3	10595
NM_017882	CLN6	7	6	22752
NM_001293	CLNS1A	7	6	21657
NM_006831	CLP1	3	2	4123
NM_001142597	CLP1	3	2	4123
NM_030782	CLPTM1L	17	16	27004
NM_174878	CLRN1	3	2	46434
NM_052995	CLRN1	4	3	18075
NM_001256819	CLRN1	4	3	46434
NM_001195794	CLRN1	4	3	46434
NM_014944	CLSTN1	18	17	95473
NM_001009566	CLSTN1	19	18	95473
NM_022131	CLSTN2	17	16	632894
NM_014718	CLSTN3	18	17	28565
NM_004859	CLTC	32	31	77269
NM_001288653	CLTC	32	31	77269
NM_001831	CLU	9	8	17896
NM_015041	CLUAP1	12	11	38108
NM_024793	CLUAP1	8	7	29159
NM_206808	CLYBL	9	8	286102
NM_001136140	CMPK1	5	4	45044
NM_016308	CMPK1	6	5	45044
NM_032359	CMSS1	10	9	360800
NM_001167924	CMSS1	10	9	63704
NM_015050	CMTR1	24	23	48379
NM_001127195	CNBP	5	4	16154
NM_001127194	CNBP	5	4	16154
NM_001127193	CNBP	5	4	16154
NM_001127196	CNBP	5	4	16154
NM_003418	CNBP	5	4	16154
NM_001127192	CNBP	5	4	16154
NM_001142564	CNGA1	10	9	45558
NM_000087	CNGA1	11	10	76969
NM_005140	CNGA2	7	6	10820
NM_001079878	CNGA3	7	6	52448
NM_001298	CNGA3	8	7	52448
NM_019098	CNGB3	18	17	169742
NM_182553	CNIH2	6	5	6015
NM_001168649	CNKSR2	20	19	268446
NM_001168648	CNKSR2	21	20	268446
NM_001168647	CNKSR2	21	20	280279
NM_014927	CNKSR2	22	21	280279
NM_201277	CNN2	6	5	12768
NM_004368	CNN2	7	6	12768
NM_199076	CNNM2	7	6	160271
NM_017649	CNNM2	8	7	160271
NM_199077	CNNM2	2	1	9302
NM_015442	CNOT10	19	18	88732
NM_001256742	CNOT10	19	18	78336
NM_001256741	CNOT10	18	17	88732
NM_017546	CNOT11	7	6	17435
NM_014516	CNOT3	18	17	18012
NM_001190849	CNOT4	12	11	148330
NM_001190848	CNOT4	11	10	123055
NM_001190847	CNOT4	11	10	148330
NM_001008225	CNOT4	11	10	123055
NM_013316	CNOT4	11	10	148330
NM_001190850	CNOT4	12	11	148330
NM_033133	CNP	4	3	10997
NM_001103176	CNPY1	4	3	32588
NM_006586	CNPY3	6	5	10150
NM_016083	CNR1	2	1	26184
NM_001160259	CNR1	2	1	26184
NM_001160258	CNR1	4	3	26184
NM_001160226	CNR1	3	2	26184
NM_033181	CNR1	2	1	5473
NM_001841	CNR2	2	1	39359
[truncated: 9,272 more rows]

## Sheet: 738 non-specific gene length
Transcript name	Gene name	Number of exons	Number of introns	Transcript length (nt)
NM_014049	ACAD9	18	17	33626
NM_001199377	ACSBG1	14	13	63864
NM_015162	ACSBG1	14	13	63864
NM_001278344	ACTN2	23	22	78175
NM_001278343	ACTN2	21	20	78175
NM_001103	ACTN2	21	20	78175
NM_004924	ACTN4	21	20	82906
NM_020328	ACVR1B	10	9	45414
NM_020327	ACVR1B	9	8	43701
NM_004302	ACVR1B	9	8	45414
NM_000020	ACVRL1	10	9	15945
NM_001077401	ACVRL1	9	8	11034
NM_000022	ADA	12	11	32215
NM_003813	ADAM21	2	1	7750
NM_001164489	ADAM8	22	21	14489
NM_001164490	ADAM8	20	19	14489
NM_001109	ADAM8	23	22	14489
NM_018417	ADCY10	33	32	104830
NM_001167749	ADCY10	30	29	104830
NM_001198592	ADCY4	26	25	16724
NM_001198568	ADCY4	25	24	16724
NM_139247	ADCY4	26	25	16724
NM_001116	ADCY9	11	10	153538
NM_019903	ADD3	14	13	129599
NM_016824	ADD3	15	14	127614
NM_001121	ADD3	14	13	127614
NM_001032394	ADGRG6	25	24	144349
NM_198569	ADGRG6	25	24	144349
NM_020455	ADGRG6	26	25	144349
NM_001032395	ADGRG6	24	23	144349
NM_014913	ADNP2	4	3	31315
NM_000674	ADORA1	4	3	39699
NM_001048230	ADORA1	3	2	39699
NM_001278499	ADORA2A	3	2	14800
NM_000675	ADORA2A	3	2	14800
NM_001278498	ADORA2A	3	2	10243
NM_001278497	ADORA2A	4	3	10243
NM_001278500	ADORA2A	3	2	18765
NM_000682	ADRA2B	1	0	3267
NM_001206934	AGER	10	9	3356
NM_001206966	AGER	10	9	3356
NM_001206940	AGER	10	9	3356
NM_001206929	AGER	11	10	3356
NM_172197	AGER	10	9	3356
NM_001136	AGER	11	10	3356
NM_001206954	AGER	9	8	3356
NM_001206932	AGER	11	10	3356
NM_001206936	AGER	10	9	3356
NM_001135187	AGFG1	14	13	89052
NM_001135189	AGFG1	12	11	89052
NM_001135188	AGFG1	13	12	89052
NM_004504	AGFG1	13	12	89052
NM_012154	AGO2	19	18	104384
NM_001164623	AGO2	18	17	104384
NM_000029	AGT	5	4	12066
NM_001130720	AHCYL2	17	16	205199
NM_015328	AHCYL2	17	16	205199
NM_001130722	AHCYL2	17	16	54570
NM_001130723	AHCYL2	17	16	62090
NM_000477	ALB	15	14	17159
NM_001206897	ALDH1A2	14	13	112501
NM_003888	ALDH1A2	13	12	112501
NM_170696	ALDH1A2	12	11	112501
NM_170697	ALDH1A2	11	10	60675
NM_207413	ALKAL1	5	4	31426
NM_001199859	ANGPT1	9	8	248546
NM_020475	ANK1	42	41	144398
NM_020477	ANK1	42	41	144398
NM_020476	ANK1	42	41	144398
NM_000037	ANK1	43	42	144398
NM_001142446	ANK1	43	42	243538
NM_020478	ANK1	5	4	12062
NM_020480	ANK1	3	2	12062
NM_001142445	ANK1	4	3	12062
NM_014391	ANKRD1	9	8	9177
NM_032139	ANKRD27	29	28	78197
NM_006401	ANP32B	7	6	32737
NM_001136015	ANXA2	14	13	50837
NM_001002857	ANXA2	14	13	50837
NM_004039	ANXA2	13	12	50837
NM_001002858	ANXA2	13	12	50837
NM_005139	ANXA3	13	12	58865
NM_004068	AP2M1	12	11	9247
NM_001025205	AP2M1	11	10	9247
NM_003664	AP3B1	27	26	292431
NM_001271769	AP3B1	27	26	292431
NM_012095	AP3M1	9	8	30813
NM_207012	AP3M1	10	9	30813
NM_005829	AP3S2	6	5	63788
NM_013229	APAF1	27	26	90135
NM_001160	APAF1	26	25	90135
NM_181861	APAF1	27	26	90135
NM_181869	APAF1	8	7	90135
NM_181868	APAF1	26	25	90135
NM_005503	APBA2	14	13	196678
NM_001130414	APBA2	13	12	196678
NM_145689	APBB1	14	13	24350
NM_001164	APBB1	14	13	23989
NM_001257323	APBB1	13	12	9811
NM_001257326	APBB1	13	12	10295
NM_001257325	APBB1	13	12	9569
NM_001257321	APBB1	14	13	10295
NM_001257320	APBB1	13	12	10541
NM_001257319	APBB1	13	12	9811
NM_005161	APLNR	1	0	3877
NM_000039	APOA1	4	3	1871
NM_000482	APOA4	3	2	2595
NM_052968	APOA5	4	3	3052
NM_001166598	APOA5	4	3	3052
NM_000384	APOB	29	28	42646
NM_000041	APOE	4	3	3613
NM_173039	AQP11	3	2	20723
NM_015193	ARC	3	2	3430
NM_001657	AREG	6	5	9875
NM_001657	AREG	6	5	9858
NM_000045	ARG1	8	7	11130
NM_001244438	ARG1	8	7	11130
NM_015313	ARHGEF12	41	40	153029
NM_001198665	ARHGEF12	40	39	153029
NM_001244364	ARHGEF28	28	27	128477
NM_001177693	ARHGEF28	36	35	315837
NM_001080479	ARHGEF28	37	36	315837
NM_212460	ARL4A	2	1	4108
NM_001037164	ARL4A	2	1	4108
NM_001195396	ARL4A	2	1	3649
NM_005738	ARL4A	2	1	3649
NM_001143968	ARL5C	6	5	9269
NM_001030273	ARNTL	20	19	109489
NM_001178	ARNTL	20	19	109489
NM_001030272	ARNTL	19	18	109489
NM_001278556	ARPC3	7	6	15523
NM_001287222	ARPC3	7	6	15523
NM_001247996	ASAP1	31	30	391557
NM_018482	ASAP1	30	29	391557
NM_017680	ASPN	8	7	26357
NM_001193335	ASPN	6	5	26357
NM_014010	ASTN2	22	21	989815
NM_198187	ASTN2	9	8	262040
NM_198186	ASTN2	8	7	261992
NM_198188	ASTN2	9	8	262040
NM_001184735	ASTN2	5	4	76421
NM_001184734	ASTN2	9	8	262040
NM_001007026	ATN1	10	9	17860
NM_001940	ATN1	10	9	14006
NM_001679	ATP1B3	7	6	49914
NM_001682	ATP2B1	20	19	68020
NM_001001323	ATP2B1	21	20	68020
NM_001684	ATP2B4	21	20	117296
NM_001001396	ATP2B4	22	21	117296
NM_001257335	ATP5F1A	12	11	14211
NM_001257334	ATP5F1A	12	11	14211
NM_001001935	ATP5F1A	12	11	14211
NM_004046	ATP5F1A	12	11	14211
NM_001001937	ATP5F1A	13	12	20091
NM_001001973	ATP5F1C	10	9	19671
NM_005174	ATP5F1C	9	8	19671
NM_001688	ATP5PB	7	6	12784
NM_001692	ATP6V1B1	14	13	29565
NM_001693	ATP6V1B2	14	13	24505
NM_000052	ATP7A	23	22	139741
NM_001282224	ATP7A	22	21	139741
NM_016529	ATP8A2	37	36	649213
NM_005603	ATP8B1	28	27	156670
NM_004048	B2M	4	3	6674
NM_001005417	B4GALT2	7	6	10668
NM_030587	B4GALT2	7	6	11237
NM_003780	B4GALT2	7	6	11971
NM_004281	BAG3	4	3	26449
NM_006340	BAIAP2	15	14	82287
NM_017451	BAIAP2	15	14	82287
NM_017450	BAIAP2	14	13	75367
NM_001144888	BAIAP2	14	13	82287
NM_138764	BAX	6	5	6940
NM_138763	BAX	5	4	6940
NM_138761	BAX	6	5	6940
NM_004324	BAX	5	4	6404
NM_138559	BCL11A	5	4	102333
NM_018014	BCL11A	5	4	102333
NM_022893	BCL11A	4	3	96306
NM_022898	BCL11B	3	2	102427
NM_001282238	BCL11B	3	2	102427
NM_001282237	BCL11B	4	3	102427
NM_138576	BCL11B	4	3	102427
NM_001204106	BCL2L11	4	3	47533
NM_001204112	BCL2L11	5	4	47533
NM_001204111	BCL2L11	4	3	47533
NM_001204110	BCL2L11	5	4	47533
NM_001204109	BCL2L11	4	3	47533
NM_001204107	BCL2L11	6	5	47533
NM_001204113	BCL2L11	6	5	25372
NM_001204108	BCL2L11	5	4	47533
NM_138627	BCL2L11	3	2	47533
NM_138626	BCL2L11	3	2	47533
NM_138624	BCL2L11	5	4	47533
NM_138621	BCL2L11	4	3	47533
NM_006538	BCL2L11	5	4	47533
NM_207003	BCL2L11	5	4	47533
NM_138625	BCL2L11	5	4	47533
NM_138623	BCL2L11	6	5	47533
NM_138622	BCL2L11	5	4	47533
NM_207002	BCL2L11	4	3	7934
NM_001130845	BCL6	10	9	15122
NM_001706	BCL6	10	9	24350
NM_001134738	BCL6	8	7	13532
NM_181844	BCL6B	9	8	6594
NM_199173	BGLAP	4	3	1174
NM_001244570	BID	4	3	40357
NM_197966	BID	6	5	39904
NM_197967	BID	5	4	40357
NM_001244569	BID	5	4	40357
NM_001244567	BID	6	5	40527
NM_001244572	BID	4	3	39904
NM_001196	BID	6	5	40357
NM_139348	BIN1	15	14	59306
NM_139347	BIN1	16	15	59306
NM_139351	BIN1	13	12	59306
NM_139350	BIN1	14	13	59306
NM_139349	BIN1	15	14	59306
NM_139346	BIN1	16	15	59306
NM_139345	BIN1	16	15	59306
NM_139344	BIN1	18	17	59306
NM_139343	BIN1	19	18	59306
NM_004305	BIN1	15	14	59306
NM_000713	BLVRB	5	4	18036
NM_001200	BMP2	3	2	12167
NM_001202	BMP4	4	3	7101
NM_130851	BMP4	4	3	4817
NM_130850	BMP4	4	3	7101
NM_021073	BMP5	7	6	120139
NM_001719	BMP7	7	6	97900
NM_004329	BMPR1A	13	12	168551
NM_001256794	BMPR1B	11	10	66961
NM_001203	BMPR1B	13	12	400475
NM_001256793	BMPR1B	11	10	106773
NM_001256792	BMPR1B	11	10	162220
NM_004052	BNIP3	6	5	14233
NM_032430	BRSK1	19	18	28371
NM_032320	BTBD10	9	8	75284
NM_006806	BTG3	5	4	19302
NM_001130914	BTG3	6	5	19302
NM_004928	C21ORF2	10	9	10473
NM_007293	C4A	41	40	20625
NM_001252204	C4A	40	39	20625
NM_007293	C4A	41	40	20624
NM_001252204	C4A	40	39	20624
NM_001002029	C4B	41	40	20626
NM_001002029	C4B	41	40	20625
NM_001737	C9	11	10	80279
NM_198584	CA13	7	6	38588
NM_000067	CA2	7	6	17592
NM_005182	CA7	7	6	9769
NM_001014435	CA7	7	6	9210
NM_001007214	CACYBP	6	5	12594
NM_014412	CACYBP	6	5	12273
NM_015722	CALY	6	5	11549
NM_003656	CAMK1	12	11	12641
NM_172082	CAMK2B	20	19	108483
NM_001220	CAMK2B	24	23	108483
NM_172080	CAMK2B	20	19	108483
NM_172083	CAMK2B	18	17	108483
NM_172084	CAMK2B	16	15	108483
NM_172081	CAMK2B	19	18	108483
NM_172079	CAMK2B	20	19	108483
NM_172078	CAMK2B	21	20	108483
NM_018584	CAMK2N1	2	1	3846
NM_203459	CAMSAP2	17	16	121147
NM_001080429	CAMSAP3	19	18	22410
NM_020902	CAMSAP3	17	16	22410
NM_001748	CAPN2	21	20	63603
NM_001146068	CAPN2	21	20	74427
NM_032983	CASP2	10	9	19483
NM_001224	CASP2	12	11	18110
NM_032982	CASP2	11	10	19483
NM_001136112	CASP5	10	9	28930
NM_001136110	CASP5	8	7	28930
NM_001136109	CASP5	9	8	28930
NM_004347	CASP5	10	9	28930
NM_033355	CASP8	10	9	54270
NM_001228	CASP8	10	9	54270
NM_033358	CASP8	8	7	48474
NM_001080124	CASP8	9	8	54270
NM_001080125	CASP8	9	8	29682
NM_033356	CASP8	8	7	27213
NM_004352	CBLN1	3	2	3915
NM_001163322	CCDC120	11	10	11015
NM_001163321	CCDC120	11	10	11015
NM_033626	CCDC120	10	9	11015
NM_001271836	CCDC120	10	9	16551
NM_001271835	CCDC120	10	9	11015
NM_001163323	CCDC120	10	9	11015
NM_001080850	CCDC30	16	15	119777
NM_001141947	CCDC66	18	17	64666
NM_001012506	CCDC66	18	17	64666
NM_000730	CCKAR	5	4	9026
NM_002983	CCL3	3	2	1905
NM_002985	CCL5	3	2	8883
NM_001278736	CCL5	4	3	8883
NM_002514	CCN3	5	4	8128
NM_001123041	CCR2	3	2	7180
NM_001123396	CCR2	2	1	5635
NM_001242	CD27	6	5	6835
NM_001250	CD40	9	8	11480
NM_152854	CD40	8	7	11480
NM_203331	CD59	5	4	33471
NM_203330	CD59	6	5	33471
NM_203329	CD59	5	4	33471
NM_001127223	CD59	3	2	19719
NM_000611	CD59	4	3	33471
NM_001127227	CD59	4	3	19944
NM_001127226	CD59	4	3	19719
NM_001127225	CD59	4	3	19719
NM_004359	CDC34	5	4	10356
NM_006201	CDK16	16	15	11320
NM_033018	CDK16	16	15	11868
NM_001170460	CDK16	16	15	6979
NM_016408	CDK5RAP1	14	13	42732
NM_016082	CDK5RAP1	14	13	42732
NM_001278169	CDK5RAP1	14	13	42732
NM_001278167	CDK5RAP1	14	13	42732
NM_001278168	CDK5RAP1	13	12	42732
NM_001145306	CDK6	8	7	231708
NM_001259	CDK6	8	7	228998
NM_001265	CDX2	3	2	7302
NM_001039213	CEACAM16	7	6	11567
NM_005194	CEBPB	1	0	2109
NM_001285878	CEBPB	1	0	2109
NM_001285879	CEBPB	1	0	2109
NM_001807	CEL	11	10	9887
NM_001202516	CFLAR	8	7	56536
NM_003879	CFLAR	10	9	56536
NM_001127184	CFLAR	6	5	25448
NM_001202519	CFLAR	9	8	56536
NM_001202517	CFLAR	9	8	56536
NM_001202515	CFLAR	6	5	32415
NM_001127183	CFLAR	10	9	54144
NM_001202518	CFLAR	8	7	39725
NM_001204174	CHODL	6	5	21497
NM_007236	CHP1	7	6	50648
NM_001006630	CHRM2	4	3	148374
NM_001006631	CHRM2	4	3	147941
NM_001006632	CHRM2	3	2	147941
NM_001006627	CHRM2	3	2	148374
NM_001006626	CHRM2	5	4	147904
NM_001006629	CHRM2	2	1	147789
NM_001006628	CHRM2	3	2	147780
NM_000739	CHRM2	4	3	147941
NM_000740	CHRM3	5	4	280346
NM_001039523	CHRNA1	10	9	16879
NM_000079	CHRNA1	9	8	16879
NM_001282455	CHRNA2	7	6	19537
NM_000742	CHRNA2	7	6	19537
NM_001166694	CHRNA3	6	5	28244
NM_000743	CHRNA3	6	5	25992
NM_001256573	CHRNA4	6	5	18088
NM_000744	CHRNA4	6	5	18088
NM_000745	CHRNA5	6	5	29751
NM_001190455	CHRNA7	10	9	139700
NM_000746	CHRNA7	10	9	139700
NM_000748	CHRNB2	6	5	12098
NM_000749	CHRNB3	6	5	39649
NM_006384	CIB1	7	6	3804
NM_001277764	CIB1	7	6	3804
NM_007174	CIT	47	46	191502
NM_001206999	CIT	48	47	191502
NM_001144887	CITED1	3	2	4278
NM_001144886	CITED1	3	2	5551
NM_001144885	CITED1	4	3	4278
NM_004143	CITED1	3	2	5351
NM_013246	CLCF1	3	2	9569
NM_001166212	CLCF1	3	2	10011
NM_001185056	CLDN11	3	2	13453
NM_005602	CLDN11	3	2	15828
NM_001185117	CLDN19	3	2	7163
NM_001123395	CLDN19	4	3	7163
NM_148960	CLDN19	5	4	7163
NM_016929	CLIC5	6	5	117438
NM_001114086	CLIC5	6	5	181897
NM_001256023	CLIC5	6	5	104268
NM_024734	CLMN	13	12	137971
NM_018941	CLN8	3	2	22868
NM_178868	CMTM8	4	3	131644
NM_001297	CNGB1	33	32	88778
NM_001286130	CNGB1	33	32	88778
NM_001135639	CNGB1	13	12	16442
NM_152495	CNIH3	6	5	124072
NM_001839	CNN3	7	6	30276
NM_001286056	CNN3	7	6	28861
NM_001286055	CNN3	6	5	30276
NM_001287438	COBL	8	7	245991
NM_001287436	COBL	14	13	300608
NM_015198	COBL	13	12	300608
NM_000090	COL3A1	51	50	38375
NM_001135161	COMT	6	5	19040
NM_007310	COMT	4	3	7430
NM_000754	COMT	6	5	28237
NM_001135162	COMT	6	5	18455
NM_001193333	CORO1A	12	11	5668
NM_007074	CORO1A	11	10	5668
NM_004255	COX5A	5	4	17880
NM_001178137	CPEB3	10	9	194641
NM_014912	CPEB3	10	9	242480
NM_014675	CROCC	37	36	51031
NM_001098482	CRTC1	15	14	98720
NM_015321	CRTC1	14	13	98720
NM_001289808	CRYAB	3	2	3408
NM_001289807	CRYAB	4	3	4595
NM_001885	CRYAB	4	3	4595
NM_000757	CSF1	9	8	20385
NM_172211	CSF1	9	8	20385
NM_172212	CSF1	9	8	16134
NM_172210	CSF1	9	8	14593
NM_005211	CSF1R	22	21	60083
NM_001288705	CSF1R	21	20	33351
NM_001178147	CSF3	4	3	2454
NM_000759	CSF3	5	4	2454
NM_172220	CSF3	4	3	2454
NM_172219	CSF3	5	4	2454
NM_001330	CTF1	3	2	6955
NM_001142544	CTF1	3	2	6955
NM_001256099	CTHRC1	4	3	10573
NM_138455	CTHRC1	4	3	11491
NM_001903	CTNNA1	18	17	181618
NM_014780	CUL7	26	25	16330
NM_001168370	CUL7	26	25	16330
NM_001202543	CUX1	24	23	442331
NM_181552	CUX1	24	23	440633
NM_001202544	CUX1	22	21	468068
NM_001202545	CUX1	22	21	468068
NM_001913	CUX1	23	22	468068
NM_181500	CUX1	23	22	468068
NM_001202546	CUX1	22	21	467964
NM_001171174	CX3CR1	2	1	18243
NM_001171172	CX3CR1	2	1	16947
NM_001171171	CX3CR1	2	1	17781
NM_001337	CX3CR1	2	1	16544
NM_001207065	CXADR	3	2	57207
NM_001207064	CXADR	4	3	57207
NM_001207063	CXADR	5	4	57207
NM_001207066	CXADR	8	7	80675
NM_001338	CXADR	7	6	57207
NM_199168	CXCL12	3	2	8037
NM_001277990	CXCL12	3	2	14946
NM_001033886	CXCL12	4	3	9232
NM_000609	CXCL12	4	3	14946
NM_001178134	CXCL12	4	3	8037
NM_000101	CYBA	6	5	7797
NM_000397	CYBB	13	12	33446
NM_018947	CYCS	3	2	6712
NM_134268	CYGB	4	3	10559
NM_000102	CYP17A1	8	7	7004
NM_001177644	DAG1	3	2	65488
NM_001177640	DAG1	4	3	65488
NM_001177639	DAG1	3	2	65488
NM_001177638	DAG1	4	3	65488
NM_001177636	DAG1	5	4	65488
NM_001177634	DAG1	6	5	65488
NM_001165928	DAG1	6	5	65488
NM_001177643	DAG1	3	2	66917
NM_001177642	DAG1	4	3	65488
NM_001177641	DAG1	4	3	65488
NM_001177637	DAG1	4	3	65488
NM_001177635	DAG1	4	3	65488
NM_004393	DAG1	3	2	65488
NM_001348	DAPK3	8	7	11376
NM_001350	DAXX	8	7	4460
NM_001254717	DAXX	7	6	4460
NM_001141969	DAXX	8	7	4460
NM_001141970	DAXX	8	7	4460
NM_016356	DCDC2	10	9	186299
NM_001195610	DCDC2	11	10	211539
NM_001361	DHODH	9	8	16675
NM_004753	DHRS3	6	5	49883
NM_138930	DIABLO	6	5	18908
NM_001278304	DIABLO	5	4	18190
NM_001278342	DIABLO	5	4	18908
NM_019887	DIABLO	7	6	19874
NM_001278303	DIABLO	5	4	18908
NM_001278302	DIABLO	5	4	18908
NM_013989	DIO2	2	1	14104
NM_001242503	DIO2	3	2	13998
NM_001242502	DIO2	4	3	13998
NM_001007023	DIO2	3	2	13998
NM_000793	DIO2	4	3	33531
NM_001362	DIO3	1	0	2103
NM_004012	DMD	51	50	1293028
NM_004014	DMD	25	24	389072
NM_000109	DMD	79	78	2220383
NM_004011	DMD	51	50	1293028
NM_004013	DMD	36	35	1036243
NM_004023	DMD	31	30	1036243
NM_004022	DMD	34	33	1036243
NM_004021	DMD	35	34	1036243
NM_004020	DMD	32	31	1036243
NM_004010	DMD	79	78	2009201
NM_004009	DMD	79	78	2009202
NM_004006	DMD	79	78	2092330
NM_004016	DMD	17	16	147681
NM_004015	DMD	18	17	147681
NM_004018	DMD	16	15	147681
NM_004017	DMD	17	16	147681
NM_004019	DMD	9	8	88714
NM_014705	DOCK4	52	51	480300
NM_003974	DOK2	5	4	4823
NM_018110	DOK4	9	8	14517
NM_001280544	DPF3	10	9	231608
NM_001280543	DPF3	11	10	233075
NM_001280542	DPF3	11	10	274822
NM_012074	DPF3	10	9	233075
NM_001171184	DRP2	22	21	44554
NM_001939	DRP2	24	23	44554
NM_007207	DUSP10	4	3	40754
NM_144729	DUSP10	3	2	40754
NM_144728	DUSP10	3	2	36040
NM_004419	DUSP5	4	3	13679
NM_130438	DYRK1A	10	9	95080
NM_130436	DYRK1A	11	10	96474
NM_101395	DYRK1A	13	12	147822
NM_001396	DYRK1A	11	10	95079
NM_001197296	ECM2	10	9	42547
NM_001197295	ECM2	10	9	40782
NM_001393	ECM2	10	9	40782
NM_001278642	EDIL3	10	9	444273
NM_005711	EDIL3	11	10	444273
NM_000114	EDN3	6	5	25550
NM_207034	EDN3	5	4	25550
NM_207033	EDN3	4	3	25550
NM_207032	EDN3	5	4	25550
NM_001122659	EDNRB	9	8	80064
NM_013302	EEF2K	18	17	82476
NM_001243252	EFHD1	4	3	76726
NM_025202	EFHD1	4	3	49286
NM_182685	EFNA1	4	3	7039
NM_004428	EFNA1	5	4	7039
NM_182690	EFNA4	4	3	5818
NM_005227	EFNA4	4	3	5818
NM_182689	EFNA4	4	3	5818
NM_022073	EGLN3	5	4	26865
NM_004836	EIF2AK3	17	16	70837
NM_019843	EIF4ENIF1	19	18	50531
NM_001164502	EIF4ENIF1	17	16	50531
NM_001164501	EIF4ENIF1	19	18	50204
NM_001114123	ELK1	7	6	15086
NM_005229	ELK1	6	5	15086
NM_001257168	ELK1	6	5	15086
NM_025165	ELL3	11	10	4706
NM_004435	ENDOG	3	2	4178
NM_000799	EPO	5	4	3232
NM_004950	EPYC	7	6	41349
NM_001982	ERBB3	28	27	23484
NM_001005915	ERBB3	3	2	5511
NM_015576	ERC2	17	16	960057
NM_031475	ESPN	13	12	36158
NM_001261439	ETV4	5	4	2594
NM_001261438	ETV4	12	11	18096
NM_001261437	ETV4	12	11	18591
NM_001986	ETV4	13	12	18096
NM_001079675	ETV4	13	12	18591
NM_000506	F2	14	13	20315
NM_024306	FA2H	7	6	61875
NM_012306	FAIM2	12	11	37083
NM_014367	FAM162A	5	4	25940
NM_152371	FAM213B	8	7	4946
NM_000043	FAS	9	8	25256
NM_152871	FAS	8	7	25256
NM_152872	FAS	8	7	25256
NM_000639	FASLG	4	3	7829
NM_001282683	FBXO31	10	9	65122
NM_024735	FBXO31	9	8	56808
NM_012174	FBXW8	11	10	120194
NM_153348	FBXW8	11	10	120194
NM_019851	FGF20	3	2	9342
NM_019113	FGF21	3	2	2240
NM_001113411	FGGY	17	16	465779
NM_018291	FGGY	16	15	465779
NM_001244714	FGGY	14	13	452654
NM_001278224	FGGY	10	9	247103
NM_001456	FLNA	47	46	26108
NM_001110556	FLNA	48	47	26108
NM_198391	FLRT3	3	2	13676
NM_013281	FLRT3	2	1	13676
NM_001159920	FLT1	13	12	109579
NM_002019	FLT1	30	29	194784
NM_001160030	FLT1	15	14	127033
NM_001160031	FLT1	12	11	96086
NM_001277313	FMN1	21	20	429191
NM_001103184	FMN1	17	16	302490
NM_001277314	FMN1	5	4	44951
NM_002023	FMOD	3	2	10810
NM_212476	FN1	44	43	75614
NM_212478	FN1	46	45	75614
NM_212474	FN1	44	43	75614
NM_002026	FN1	46	45	75614
NM_212482	FN1	46	45	75614
NM_054034	FN1	13	12	21409
NM_005438	FOSL1	4	3	8307
NM_004496	FOXA1	2	1	5570
NM_001291281	FOXO6	3	2	22156
NM_194277	FRMD7	12	11	51031
NM_023037	FRY	61	60	265341
NM_005860	FSTL3	5	4	7005
NM_203505	G3BP2	12	11	30716
NM_203504	G3BP2	11	10	30716
NM_012297	G3BP2	12	11	30392
NM_001042351	G6PD	13	12	16198
NM_000402	G6PD	13	12	15630
NM_031412	GABARAPL1	4	3	10237
NM_001199741	GADD45A	3	2	3163
NM_001199742	GADD45A	3	2	3163
NM_001924	GADD45A	4	3	3163
NM_015973	GAL	6	5	6662
NM_007210	GALNT6	12	11	39369
NM_001289745	GAPDH	9	8	3972
NM_002046	GAPDH	9	8	3972
NM_001289746	GAPDH	8	7	3718
NM_001256799	GAPDH	8	7	3158
NM_002048	GAS1	1	0	2829
NM_001145661	GATA2	7	6	9110
NM_032638	GATA2	6	5	13767
NM_001145662	GATA2	6	5	8501
NM_002051	GATA3	6	5	20499
NM_001002295	GATA3	6	5	20499
NM_000557	GDF5	2	1	4880
NM_001127216	GFI1	7	6	11312
NM_001127215	GFI1	7	6	9040
NM_005263	GFI1	7	6	12117
NM_001496	GFRA3	8	7	22186
NM_207410	GFRAL	9	8	75026
NM_021081	GHRH	4	3	5811
NM_001184731	GHRH	4	3	5811
NM_001134946	GHRL	3	2	7199
NM_001134945	GHRL	4	3	7199
NM_001134944	GHRL	4	3	7199
NM_016362	GHRL	5	4	4987
NM_001134941	GHRL	5	4	4987
NM_004123	GIP	6	5	10039
NM_000165	GJA1	2	1	14130
NM_004004	GJB2	2	1	5512
NM_181789	GLDN	10	9	66498
NM_197962	GLRX2	4	3	9015
NM_016066	GLRX2	4	3	9651
NM_001243399	GLRX2	4	3	9594
NM_002078	GOLGA4	24	23	123690
NM_001172713	GOLGA4	23	22	123690
NM_020399	GOPC	9	8	42274
NM_001017408	GOPC	8	7	42274
NM_002079	GOT1	9	8	33905
NM_002080	GOT2	10	9	27228
NM_001286220	GOT2	9	8	27228
NM_004488	GP5	2	1	4447
NM_002510	GPNMB	11	10	28415
NM_001005340	GPNMB	11	10	28415
NM_005279	GPR1	3	2	42731
NM_001098199	GPR1	3	2	42731
NM_001261455	GPR1	3	2	38312
NM_001261454	GPR1	3	2	38312
NM_001261453	GPR1	4	3	42731
NM_001261452	GPR1	4	3	42731
NM_001038705	GPR149	4	3	92045
NM_018969	GPR173	2	1	31292
NM_004951	GPR183	2	1	12962
NM_001195381	GPR35	6	5	25853
NM_001195382	GPR35	6	5	25853
NM_005301	GPR35	2	1	6016
NM_006794	GPR75	2	1	7122
NM_022049	GPR88	2	1	3857
NM_016235	GPRC5B	4	3	25860
NM_005311	GRB10	16	15	142292
NM_001001555	GRB10	17	16	203401
NM_001001550	GRB10	16	15	115240
NM_001001549	GRB10	15	14	142292
NM_005310	GRB7	15	14	9378
NM_001030002	GRB7	15	14	8964
NM_001242443	GRB7	15	14	7320
NM_001242442	GRB7	15	14	8516
NM_000831	GRIK3	16	15	238718
NM_001278553	GRIN2C	12	11	16797
NM_000835	GRIN2C	13	12	17847
NM_182982	GRK4	16	15	77133
NM_005307	GRK4	14	13	77133
NM_001004057	GRK4	15	14	77133
NM_001004056	GRK4	15	14	77133
NM_001127454	GSDME	9	8	59667
NM_001127453	GSDME	10	9	59111
NM_004403	GSDME	10	9	59667
NM_001163636	GTF2I	34	33	103033
NM_001280800	GTF2I	10	9	59397
NM_032999	GTF2I	35	34	103033
NM_033000	GTF2I	34	33	103033
NM_033001	GTF2I	34	33	103033
NM_001518	GTF2I	33	32	103033
NM_007102	GUCA2B	3	2	2405
NM_012205	HAAO	10	9	25524
NM_021973	HAND2	2	1	3728
NM_021072	HCN1	8	7	441170
NM_020897	HCN3	8	7	12423
NM_005477	HCN4	8	7	49407
NM_178425	HDAC9	25	24	501109
NM_178423	HDAC9	26	25	501625
NM_058176	HDAC9	23	22	458056
NM_001204145	HDAC9	11	10	173099
NM_001204148	HDAC9	11	10	159568
NM_001204146	HDAC9	11	10	173099
NM_001204144	HDAC9	13	12	581896
NM_014707	HDAC9	12	11	173098
NM_001204147	HDAC9	10	9	159568
NM_152722	HEPACAM	7	6	17164
NM_001272103	HERPUD1	8	7	11793
NM_014685	HERPUD1	8	7	11793
NM_001010989	HERPUD1	8	7	11793
NM_012259	HEY2	5	4	11685
NM_022475	HHIP	13	12	92735
NM_003959	HIP1R	32	31	27470
NM_006339	HMG20B	10	9	6140
NM_001003681	HMGXB4	11	10	38357
NM_001024075	HNMT	3	2	17442
NM_001024074	HNMT	2	1	3208
NM_006895	HNMT	6	5	52128
NM_005826	HNRNPR	11	10	34579
NM_001102397	HNRNPR	10	9	34579
NM_001102399	HNRNPR	10	9	34579
NM_001102398	HNRNPR	11	10	34579
NM_001277077	HOMER1	6	5	140014
NM_004272	HOMER1	9	8	140014
NM_001277078	HOMER1	6	5	140014
NM_199330	HOMER2	9	8	103749
NM_004839	HOMER2	9	8	103749
NM_017409	HOXC10	2	1	5118
NM_004503	HOXC6	2	1	2415
NM_153693	HOXC6	3	2	13973
NM_022658	HOXC8	2	1	3657
NM_024501	HOXD1	2	1	2330
NM_002148	HOXD10	2	1	3180
NM_014213	HOXD9	2	1	2234
NM_002151	HPN	14	13	26069
NM_182983	HPN	13	12	26069
NM_021979	HSPA2	1	0	2770
NM_001540	HSPB1	3	2	1741
NM_199440	HSPD1	12	11	13692
NM_002156	HSPD1	12	11	13334
NM_001165947	HTR2A	3	2	65536
NM_000621	HTR2A	4	3	65536
NM_213621	HTR3A	8	7	15239
NM_000869	HTR3A	9	8	15239
NM_001161772	HTR3A	9	8	12814
NM_019860	HTR7	3	2	117097
NM_019859	HTR7	4	3	117097
NM_000872	HTR7	3	2	117097
NM_013247	HTRA2	8	7	4153
NM_145074	HTRA2	6	5	4153
NM_000415	IAPP	3	2	7114
NM_002168	IDH2	11	10	18498
NM_001289910	IDH2	11	10	16644
NM_005530	IDH3A	11	10	21167
NM_002164	IDO1	10	9	14983
NM_004907	IER2	2	1	4438
NM_000619	IFNG	4	3	4973
NM_000416	IFNGR1	7	6	21948
NM_006860	IFT27	7	6	17933
NM_001177701	IFT27	7	6	17933
NM_001127598	IGF2	5	4	11996
NM_000612	IGF2	4	3	9859
NM_001007139	IGF2	5	4	20488
NM_001160423	IGF2BP1	13	12	58735
NM_006546	IGF2BP1	15	14	58735
NM_001552	IGFBP4	4	3	14308
NM_002180	IGHMBP2	15	14	36752
NM_001135050	IGSF9	21	20	18559
NM_020789	IGSF9	21	20	18559
NM_001145255	IKBKG	8	7	17701
NM_001099857	IKBKG	10	9	17701
NM_001099856	IKBKG	10	9	22804
NM_003639	IKBKG	10	9	17201
NM_002188	IL13	4	3	2938
NM_002182	IL1RAP	12	11	137470
NM_134470	IL1RAP	9	8	116235
NM_001167928	IL1RAP	13	12	137470
NM_001167931	IL1RAP	12	11	143148
NM_001167929	IL1RAP	11	10	137470
NM_001167930	IL1RAP	8	7	116235
NM_000586	IL2	4	3	5026
NM_001242639	IL31RA	16	15	64017
NM_001242638	IL31RA	18	17	71477
NM_001242637	IL31RA	16	15	71477
NM_001242636	IL31RA	15	14	64017
NM_139017	IL31RA	15	14	65960
NM_000600	IL6	5	4	4857
NM_001278442	ILK	12	11	7169
NM_001278441	ILK	11	10	7169
NM_001014795	ILK	12	11	7067
NM_001014794	ILK	13	12	7169
NM_004517	ILK	13	12	7169
NM_018439	IMPACT	11	10	26887
NM_001284287	INPP5J	12	11	11776
NM_001284285	INPP5J	13	12	11776
NM_001284289	INPP5J	15	14	11776
NM_001284288	INPP5J	14	13	11776
NM_001284286	INPP5J	14	13	11776
NM_001002837	INPP5J	13	12	11776
NM_130766	INPP5K	13	12	22313
NM_001135642	INPP5K	14	13	22313
NM_016532	INPP5K	12	11	22313
NM_181501	ITGA1	29	28	165351
NM_002203	ITGA2	30	29	105455
NM_002204	ITGA3	26	25	34511
NM_005501	ITGA3	25	24	34511
NM_003638	ITGA8	30	29	202684
NM_002211	ITGB1	16	15	58049
NM_033668	ITGB1	16	15	35242
NM_133376	ITGB1	16	15	57578
NM_002226	JAG2	26	25	27845
NM_145159	JAG2	25	24	27845
NM_032801	JAM3	9	8	82834
NM_001205329	JAM3	8	7	82834
NM_032452	JPH4	7	6	10767
NM_001146028	JPH4	6	5	10767
NM_001204269	KCNA2	5	4	37896
NM_004974	KCNA2	3	2	3201
NM_002232	KCNA3	1	0	2583
NM_002233	KCNA4	2	1	7291
NM_002235	KCNA6	2	1	41938
NM_001260499	KCNC2	4	3	169672
NM_001260498	KCNC2	5	4	169672
NM_001260497	KCNC2	5	4	169672
NM_139137	KCNC2	5	4	169672
NM_139136	KCNC2	6	5	169672
NM_153748	KCNC2	5	4	169672
NM_004979	KCND1	6	5	9614
NM_012281	KCND2	6	5	476667
NM_005472	KCNE3	3	2	12716
NM_001204798	KCNH2	5	4	6403
NM_172056	KCNH2	9	8	28888
NM_000238	KCNH2	15	14	33360
NM_172057	KCNH2	11	10	10875
NM_173195	KCNIP2	8	7	17948
NM_173194	KCNIP2	8	7	13882
NM_173193	KCNIP2	8	7	17948
NM_173192	KCNIP2	9	8	17948
NM_173191	KCNIP2	10	9	17948
NM_173197	KCNIP2	6	5	16281
NM_014591	KCNIP2	10	9	17948
NM_000525	KCNJ11	1	0	3412
NM_001166290	KCNJ11	2	1	4084
NM_013348	KCNJ14	3	2	10405
NM_002245	KCNK1	3	2	58510
NM_014217	KCNK2	7	6	153878
NM_001017425	KCNK2	7	6	153878
NM_001017424	KCNK2	7	6	231553
NM_181361	KCNMB2	5	4	308133
NM_001278911	KCNMB2	5	4	285731
NM_005832	KCNMB2	6	5	285731
NM_014505	KCNMB4	3	2	68012
NM_001278204	KCNN2	7	6	134183
NM_170775	KCNN2	6	5	62972
NM_021614	KCNN2	8	7	134183
NM_001204087	KCNN3	9	8	172814
NM_002249	KCNN3	8	7	172814
NM_170782	KCNN3	8	7	162398
NM_002253	KDR	30	29	47338
NM_015656	KIF26A	15	14	42177
NM_012310	KIF4A	31	30	130897
NM_001286349	KIRREL	13	12	106991
NM_018240	KIRREL	15	14	106991
NM_020866	KLHL1	11	10	407902
NM_001286725	KLHL1	10	9	407902
NM_020805	KLHL14	9	8	100342
NM_001281431	KLK8	5	4	5696
NM_007196	KLK8	6	5	5696
NM_144507	KLK8	3	2	5696
NM_144506	KLK8	4	3	5696
NM_144505	KLK8	6	5	5696
NM_001097611	KNCN	3	2	5573
NM_032045	KREMEN1	10	9	95257
NM_001039570	KREMEN1	9	8	73744
NM_001079823	LAMA2	64	63	633426
NM_000426	LAMA2	65	64	633426
NM_002291	LAMB1	34	33	79560
NM_002292	LAMB2	32	31	12054
NM_001113407	LDB1	11	10	12887
NM_003893	LDB1	11	10	7400
NM_020997	LEFTY1	4	3	2866
NM_000230	LEP	3	2	16353
NM_002305	LGALS1	4	3	4198
NM_139278	LGI3	8	7	10003
NM_001008530	LGMN	15	14	44897
NM_005606	LGMN	14	13	44897
NM_182548	LHFPL5	4	3	18783
NM_005568	LHX1	5	4	7145
NM_002309	LIF	3	2	6406
NM_001257135	LIF	2	1	6406
NM_001098268	LIG4	2	1	10926
NM_002312	LIG4	2	1	7340
NM_206937	LIG4	3	2	8092
NM_032338	LLPH	3	2	7686
NM_012152	LPAR3	3	2	79812
NM_024509	LRFN3	3	2	8077
NM_024036	LRFN4	2	1	3072
NM_002332	LRP1	89	88	84845
NM_032832	LRP11	7	6	45588
NM_013437	LRP12	7	6	99795
NM_001135703	LRP12	6	5	99795
NM_002334	LRP4	38	37	61907
NM_152611	LRRN4	5	4	13536
NM_205839	LST1	5	4	2732
NM_205840	LST1	3	2	1711
NM_001166538	LST1	3	2	1711
NM_205837	LST1	4	3	2212
NM_007161	LST1	4	3	1711
NM_205838	LST1	4	3	2732
NM_001159740	LTA	4	3	2226
NM_000595	LTA	4	3	2031
NM_023946	LYNX1	5	4	13885
NM_177458	LYNX1	3	2	5492
NM_177476	LYNX1	4	3	5824
NM_177477	LYNX1	4	3	6131
NM_177457	LYNX1	4	3	7027
NM_001282533	LZTS3	6	5	10977
NM_018202	MACO1	11	10	69351
NM_001282564	MACO1	9	8	69351
NM_032272	MAF1	8	7	3212
NM_020932	MAGEE1	1	0	3702
NM_001033057	MAGI1	23	22	684605
NM_004742	MAGI1	23	22	679567
NM_015520	MAGI1	25	24	684605
NM_002371	MAL	4	3	28339
NM_022440	MAL	2	1	28339
NM_022439	MAL	3	2	28339
NM_022438	MAL	3	2	28339
NM_052886	MAL2	5	4	37306
NM_002372	MAN2A1	22	21	180261
NM_002755	MAP2K1	11	10	104673
NM_002419	MAP3K11	10	9	16496
NM_005923	MAP3K5	30	29	235471
NM_002375	MAP4	19	18	238591
NM_030885	MAP4	4	3	116202
NM_001134364	MAP4	18	17	238591
NM_012324	MAPK8IP2	12	11	10850
NM_016431	MAPK8IP2	10	9	8419
NM_002380	MATN2	19	18	167637
NM_030583	MATN2	19	18	167637
NM_015847	MBD1	16	15	12930
NM_015846	MBD1	17	16	12930
NM_015845	MBD1	14	13	12930
NM_015844	MBD1	16	15	12930
NM_002384	MBD1	15	14	12930
NM_001204142	MBD1	14	13	12930
NM_001204141	MBD1	15	14	14894
NM_001204138	MBD1	17	16	10734
NM_001204136	MBD1	16	15	12930
NM_001204140	MBD1	16	15	10734
NM_001204139	MBD1	17	16	14894
NM_001204137	MBD1	17	16	10734
NM_001204143	MBD1	14	13	12923
NM_001204151	MBD1	13	12	8550
NM_001171879	MCF2	26	25	61072
NM_001171878	MCF2	23	22	61072
NM_001171877	MCF2	22	21	61072
NM_001171876	MCF2	29	28	126453
NM_001099855	MCF2	28	27	126453
NM_005369	MCF2	25	24	61072
NM_001253693	MCOLN3	12	11	30460
NM_018298	MCOLN3	13	12	30460
NM_001199112	MDH1	8	7	18047
NM_001199111	MDH1	9	8	18047
NM_005917	MDH1	9	8	18589
NM_005918	MDH2	9	8	19492
NM_001282403	MDH2	8	7	19492
NM_001282404	MDH2	8	7	19492
NM_004774	MED1	17	16	46991
NM_005924	MEOX2	3	2	75473
NM_006343	MERTK	19	18	130756
NM_001277068	MFF	8	7	29160
NM_001277066	MFF	6	5	32687
NM_001277063	MFF	8	7	32687
NM_001277061	MFF	11	10	32687
NM_020194	MFF	11	10	30326
NM_001277062	MFF	9	8	32687
NM_001277067	MFF	8	7	29160
NM_001277065	MFF	7	6	32687
NM_001277064	MFF	8	7	32687
NM_031433	MFRP	15	14	7741
NM_152778	MFSD8	13	12	48181
NM_182924	MICALL2	17	16	25116
NM_001193278	MID1	7	6	98340
NM_001193280	MID1	6	5	98340
NM_001193281	MID1	3	2	62264
NM_000381	MID1	10	9	175326
NM_001098624	MID1	10	9	232431
NM_033290	MID1	10	9	438461
NM_001193279	MID1	6	5	98340
NM_001193277	MID1	10	9	131609
NM_033289	MID1	10	9	175326
NM_017777	MKS1	18	17	13871
NM_001165927	MKS1	18	17	14171
NM_024101	MLPH	16	15	68101
NM_001042467	MLPH	15	14	68101
NM_001281474	MLPH	14	13	68910
NM_001281473	MLPH	13	12	68101
NM_012329	MMD	7	6	29369
NM_007289	MME	23	22	103441
NM_007288	MME	23	22	103567
NM_007287	MME	23	22	103815
NM_000902	MME	23	22	104084
NM_004994	MMP9	13	12	7655
NM_005373	MPL	12	11	16662
NM_001166462	MPP1	13	12	26845
NM_001166461	MPP1	12	11	26845
NM_001166460	MPP1	12	11	26845
NM_002436	MPP1	12	11	26845
NM_020831	MRTFA	15	14	226440
NM_001282661	MRTFA	14	13	226440
NM_001282662	MRTFA	15	14	226440
NM_001282660	MRTFA	12	11	53161
NM_014341	MTCH1	12	11	18418
NM_001271641	MTCH1	12	11	18418
NM_005592	MUSK	14	13	132229
NM_001166281	MUSK	12	11	132229
NM_001166280	MUSK	13	12	132229
NM_016132	MYEF2	17	16	38931
NM_001077186	MYH14	42	41	106918
NM_024729	MYH14	41	40	106918
NM_001145809	MYH14	43	42	106918
NM_021223	MYL7	7	6	2455
NM_015194	MYO1D	22	21	384276
NM_000261	MYOC	3	2	17218
NM_015460	MYRIP	17	16	450662
NM_001284423	MYRIP	17	16	451408
NM_001284425	MYRIP	16	15	450662
NM_001284424	MYRIP	16	15	450662
NM_001284426	MYRIP	15	14	160311
NM_000265	NCF1	11	10	15413
NM_001010980	NCMAP	4	3	53253
NM_004544	NDUFA10	10	9	68032
NM_004551	NDUFS3	7	6	5555
NM_024407	NDUFS7	8	7	11707
NM_004210	NEURL1	6	5	98576
NM_001198967	NFATC4	11	10	12696
NM_001198966	NFATC4	10	9	10525
NM_001136022	NFATC4	10	9	12696
NM_001198965	NFATC4	10	9	11586
NM_004554	NFATC4	10	9	11586
NM_001288802	NFATC4	9	8	10454
NM_001282787	NFIB	11	10	98961
NM_005596	NFIB	9	8	232205
NM_001190738	NFIB	9	8	317142
NM_001190737	NFIB	11	10	232205
NM_001033088	NGRN	3	2	6550
NM_021824	NIF3L1	7	6	14549
NM_001142356	NIF3L1	5	4	12016
NM_001142355	NIF3L1	7	6	14607
NM_001136039	NIF3L1	7	6	14607
NM_001166176	NKX2-5	2	1	3210
NM_001166175	NKX2-5	2	1	3210
NM_004387	NKX2-5	2	1	3210
NM_153447	NLRP5	15	14	62084
NM_176811	NLRP8	10	9	40799
NM_181689	NNAT	2	1	2485
NM_005386	NNAT	3	2	2485
NM_005450	NOG	1	0	1893
NM_000435	NOTCH3	33	32	41350
NM_002518	NPAS2	21	20	176676
NM_000272	NPHP1	20	19	81727
NM_001128178	NPHP1	20	19	81727
NM_207181	NPHP1	20	19	81727
NM_001128179	NPHP1	18	17	81727
NM_014293	NPTXR	5	4	25563
NM_000905	NPY	4	3	7679
NM_001025434	NQO1	5	4	17231
NM_000903	NQO1	6	5	17231
NM_001286137	NQO1	4	3	17269
NM_001025433	NQO1	5	4	17231
NM_001160008	NRG1	11	10	212781
NM_001160005	NRG1	5	4	195044
NM_001159995	NRG1	11	10	169216
NM_001160007	NRG1	4	3	180410
NM_001160004	NRG1	13	12	216832
NM_004495	NRG1	6	5	180410
NM_013962	NRG1	5	4	1103504
NM_013958	NRG1	7	6	195044
NM_013957	NRG1	12	11	216832
NM_013956	NRG1	13	12	216832
NM_013964	NRG1	12	11	216832
NM_013959	NRG1	3	2	96521
NM_013960	NRG1	13	12	216832
NM_001159999	NRG1	12	11	169216
NM_001160002	NRG1	5	4	180410
NM_001160001	NRG1	10	9	169216
NM_001159996	NRG1	9	8	43209
NM_001010848	NRG3	9	8	1111867
NM_001165973	NRG3	11	10	1109494
NM_001165972	NRG3	9	8	1111867
NM_198443	NRN1L	3	2	1492
NM_004558	NRTN	2	1	4519
NM_001040101	NSG1	5	4	32804
NM_001287763	NSG1	6	5	32804
NM_014392	NSG1	5	4	32097
NM_001287764	NSG1	5	4	32804
XM_011527010	NTF5	7	6	6792
NM_021229	NTN4	10	9	132955
NM_032536	NTNG2	8	7	80888
NM_015311	OBSL1	21	20	20820
NM_001173431	OBSL1	14	13	16398
NM_001173408	OBSL1	9	8	9832
NM_001165036	OGDH	23	22	102550
NM_002541	OGDH	23	22	102550
NM_001003941	OGDH	9	8	70076
NM_033014	OGN	7	6	20690
NM_014057	OGN	7	6	20690
NM_006418	OLFM4	5	4	23322
NM_004852	ONECUT2	2	1	55615
NM_032831	ORAI2	3	2	23293
NM_001271819	ORAI2	3	2	23293
NM_001271818	ORAI2	4	3	23293
NM_001126340	ORAI2	4	3	23293
NM_030758	OSBP2	14	13	213020
NM_001282739	OSBP2	14	13	213020
NM_001282740	OSBP2	13	12	143573
NM_001282738	OSBP2	15	14	214044
NM_001282741	OSBP2	13	12	85310
NM_001282742	OSBP2	12	11	26145
NM_198184	OSTN	3	2	37590
NM_000916	OXTR	4	3	19207
NM_002562	P2RX7	13	12	53725
NM_002563	P2RY1	1	0	3109
NM_022788	P2RY12	3	2	47971
NM_176876	P2RY12	2	1	4014
NM_001014835	PAK4	9	8	53628
NM_001014832	PAK4	9	8	53628
NM_001014831	PAK4	11	10	53628
NM_001014834	PAK4	8	7	53628
NM_005884	PAK4	10	9	53628
NM_019619	PARD3	25	24	705767
NM_001184792	PARD3	21	20	503067
NM_001184793	PARD3	21	20	503067
NM_001184794	PARD3	20	19	503067
NM_001184790	PARD3	23	22	705767
NM_001184789	PARD3	23	22	705767
NM_001184791	PARD3	21	20	705767
NM_001184788	PARD3	24	23	705767
NM_001184787	PARD3	24	23	705767
NM_001184786	PARD3	24	23	705767
NM_001184785	PARD3	25	24	705767
NM_018935	PCDHB15	1	0	2886
NM_174936	PCSK9	12	11	25379
NM_002597	PDC	4	3	17544
NM_022576	PDC	3	2	5160
NM_001258313	PDE1A	14	13	259163
NM_001258312	PDE1A	16	15	382812
NM_005019	PDE1A	15	14	382576
NM_001003683	PDE1A	15	14	354960
NM_001258314	PDE1A	13	12	74178
NM_000924	PDE1B	16	15	29848
NM_001165975	PDE1B	15	14	17797
NM_001288768	PDE1B	16	15	29848
NM_001288769	PDE1B	15	14	29161
NM_001146209	PDE2A	32	31	92926
NM_002599	PDE2A	31	30	98315
NM_001243784	PDE2A	31	30	66322
NM_001143839	PDE2A	30	29	66322
NM_001037341	PDE4B	17	16	582071
NM_002600	PDE4B	17	16	581408
NM_001037340	PDE4B	15	14	381874
NM_001037339	PDE4B	10	9	42471
NM_001001580	PDE9A	14	13	121758
NM_001001575	PDE9A	15	14	121758
NM_001001573	PDE9A	17	16	121758
NM_001001572	PDE9A	16	15	121758
NM_002606	PDE9A	20	19	121758
NM_001001585	PDE9A	18	17	121758
NM_001001584	PDE9A	18	17	121758
NM_001001583	PDE9A	19	18	121758
NM_001001582	PDE9A	19	18	121758
NM_001001581	PDE9A	18	17	121758
NM_001001579	PDE9A	17	16	121758
NM_001001578	PDE9A	17	16	121758
NM_001001577	PDE9A	16	15	121758
NM_001001576	PDE9A	15	14	121758
NM_001001574	PDE9A	18	17	121758
NM_001001571	PDE9A	18	17	121758
NM_001001570	PDE9A	19	18	121758
NM_001001569	PDE9A	16	15	121758
NM_001001568	PDE9A	17	16	121758
NM_001001567	PDE9A	19	18	121758
NM_001011516	PDLIM5	10	9	136364
NM_001011513	PDLIM5	13	12	216372
NM_001256426	PDLIM5	17	16	216372
NM_001256428	PDLIM5	12	11	216372
NM_001256427	PDLIM5	15	14	216372
NM_006457	PDLIM5	13	12	216372
NM_001256425	PDLIM5	12	11	216372
NM_001011515	PDLIM5	9	8	136364
NM_001256429	PDLIM5	3	2	5334
NM_000287	PEX6	17	16	15372
NM_000288	PEX7	10	9	91372
NM_005022	PFN1	3	2	3438
NM_015937	PIGT	12	11	10180
NM_001184730	PIGT	10	9	10180
NM_001184729	PIGT	11	10	10180
NM_001184728	PIGT	11	10	10180
NM_181504	PIK3R1	10	9	11184
NM_181524	PIK3R1	10	9	13399
NM_001242466	PIK3R1	9	8	9255
NM_181523	PIK3R1	16	15	86067
NM_006224	PITPNA	12	11	44829
NM_001042702	PJVK	7	6	9949
NM_001005476	PKP4	21	20	224466
NM_003628	PKP4	22	21	224466
NM_003561	PLA2G10	4	3	22123
NM_001004426	PLA2G6	16	15	70261
NM_003560	PLA2G6	17	16	70261
NM_001199562	PLA2G6	16	15	70336
NM_182734	PLCB1	33	32	752637
NM_015192	PLCB1	32	31	752637
NM_002660	PLCG1	32	31	38198
NM_182811	PLCG1	32	31	38198
NM_015993	PLLP	4	3	28577
NM_001166252	PLPPR4	6	5	45292
NM_014839	PLPPR4	7	6	45292
NM_005761	PLXNC1	31	30	158954
NM_015103	PLXND1	36	35	51528
NM_152491	PM20D1	13	12	22107
NM_001281456	PMP22	5	4	35582
NM_001281455	PMP22	5	4	32814
NM_000304	PMP22	5	4	35582
NM_153322	PMP22	4	3	31069
NM_153321	PMP22	5	4	32814
NM_002693	POLG	23	22	18492
NM_001126131	POLG	23	22	18492
NM_001018102	POLR2M	4	3	11038
NM_015532	POLR2M	4	3	11038
NM_005036	PPARA	9	8	93156
NM_001001928	PPARA	8	7	93156
NM_001171819	PPARD	7	6	85635
NM_006238	PPARD	8	7	85635
NM_001171820	PPARD	6	5	85635
NM_001171818	PPARD	9	8	85635
NM_177435	PPARD	7	6	82840
NM_015869	PPARG	7	6	82856
NM_138711	PPARG	8	7	145421
NM_138712	PPARG	8	7	146508
NM_005037	PPARG	7	6	146508
NM_206873	PPP1CA	6	5	3726
NM_002708	PPP1CA	7	6	3726
NM_001008709	PPP1CA	7	6	3726
NM_015316	PPP1R13B	17	16	113841
NM_006741	PPP1R1A	7	6	9421
NM_001166160	PPP1R9A	20	19	388780
NM_017650	PPP1R9A	16	15	388780
NM_001166163	PPP1R9A	14	13	386519
NM_001166162	PPP1R9A	17	16	386519
NM_001166161	PPP1R9A	18	17	386519
NM_006255	PRKCH	14	13	229185
NM_002742	PRKD1	18	17	351214
NM_006902	PRRX1	5	4	75230
NM_022716	PRRX1	4	3	75230
NM_032289	PSD2	15	14	48644
NM_004577	PSPH	8	7	40526
NM_004158	PSPN	2	1	557
NM_004778	PTGDR2	2	1	5048
NM_001271367	PTGS1	11	10	24700
NM_000962	PTGS1	11	10	24700
NM_001271368	PTGS1	12	11	25175
NM_080591	PTGS1	11	10	24700
NM_001271165	PTGS1	10	9	20383
NM_001271164	PTGS1	10	9	24700
NM_001271166	PTGS1	11	10	25175
NM_005975	PTK6	8	7	8949
NM_001256358	PTK6	7	6	8949
NM_080921	PTPRC	30	29	118509
NM_002838	PTPRC	33	32	118509
NM_001267798	PTPRC	4	3	56204
NM_002854	PVALB	5	4	18774
NM_001206836	RAB11A	5	4	22534
NM_004663	RAB11A	5	4	22534
NM_022449	RAB17	6	5	16806
NM_006861	RAB35	6	5	21746
NM_001167606	RAB35	5	4	21746
NM_002884	RAP1A	8	7	93698
NM_001010935	RAP1A	9	8	93698
NM_001145658	RAP1GAP	25	24	55642
NM_001145657	RAP1GAP	27	26	73150
NM_002885	RAP1GAP	25	24	73150
NM_032645	RAPSN	6	5	11424
NM_005055	RAPSN	8	7	11424
NM_016152	RARB	8	7	169670
NM_000965	RARB	8	7	169590
NM_001098671	RASGRP2	17	16	17249
NM_001098670	RASGRP2	17	16	17948
NM_153819	RASGRP2	17	16	18547
NM_001145971	RDH13	7	6	18895
NM_138412	RDH13	8	7	25224
NM_138393	REEP6	5	4	6761
NM_001243985	RELA	12	11	9378
NM_001243984	RELA	11	10	9378
NM_021975	RELA	11	10	9378
NM_001145138	RELA	11	10	9378
NM_001034850	RETREG1	9	8	144022
NM_019000	RETREG1	7	6	35962
NM_178126	RETREG3	9	8	29921
NM_001005339	RGS10	5	4	42885
NM_002925	RGS10	5	4	36708
NM_001039467	RGS19	6	5	6791
NM_005873	RGS19	6	5	6312
NM_178314	RILPL1	7	6	62358
NM_014989	RIMS1	34	33	516441
NM_001168409	RIMS1	22	21	186702
NM_001168410	RIMS1	22	21	186384
NM_001168408	RIMS1	21	20	190333
NM_001168407	RIMS1	25	24	190333
NM_001168411	RIMS1	6	5	36415
NM_014677	RIMS2	22	21	435242
NM_001282881	RIMS2	21	20	435242
NM_001100117	RIMS2	24	23	753682
NM_001282882	RIMS2	6	5	31092
NM_014747	RIMS3	8	7	44974
NM_014722	RIPOR2	23	22	106891
NM_001286446	RIPOR2	14	13	202803
NM_001286445	RIPOR2	22	21	131773
NM_001286447	RIPOR2	14	13	38000
NM_015864	RIPOR2	14	13	38000
NM_007148	RNF112	14	13	6100
NM_001207033	RNF40	20	19	14697
NM_014771	RNF40	20	19	14697
NM_001207034	RNF40	18	17	14697
NM_001286572	RNF40	20	19	14020
NM_183043	RNF6	5	4	9125
NM_183044	RNF6	5	4	8991
NM_005977	RNF6	5	4	9605
NM_178857	RP1L1	4	3	48759
NM_015272	RPGRIP1L	27	26	103955
NM_001127897	RPGRIP1L	25	24	103955
NM_032730	RTN4IP1	9	8	58472
NM_006271	S100A1	3	2	3642
NM_019554	S100A4	4	3	2189
NM_002961	S100A4	3	2	2186
NM_014624	S100A6	3	2	1643
NM_015265	SATB2	12	11	201768
NM_001172517	SATB2	12	11	195610
NM_001172509	SATB2	11	10	188598
NM_006922	SCN3A	28	27	116549
NM_001081677	SCN3A	28	27	116549
NM_001081676	SCN3A	28	27	116549
NM_000334	SCN4A	24	23	34366
NM_002976	SCN7A	25	24	83400
NM_002977	SCN9A	27	26	180802
NM_007281	SCRG1	3	2	11320
NM_004168	SDHA	15	14	38460
NM_001144952	SDK2	45	44	309706
NM_006080	SEMA3A	17	16	236560
NM_001005914	SEMA3B	18	17	9534
NM_004636	SEMA3B	18	17	9534
NM_001193300	SEMA4A	15	14	24222
NM_022367	SEMA4A	15	14	24222
NM_001193302	SEMA4A	13	12	24175
NM_001193301	SEMA4A	15	14	27809
NM_020210	SEMA4B	15	14	44742
NM_198925	SEMA4B	14	13	28332
NM_006378	SEMA4D	18	17	102461
NM_001142287	SEMA4D	21	20	118907
NM_032108	SEMA6B	17	16	17173
NM_001178062	SEMA6C	19	18	14979
NM_001178061	SEMA6C	20	19	14979
NM_030913	SEMA6C	19	18	14979
NM_001146029	SEMA7A	13	12	24671
NM_001146030	SEMA7A	14	13	24373
NM_003612	SEMA7A	14	13	24671
NM_001008491	SEPT2#	14	13	38841
NM_001008492	SEPT2#	14	13	38167
NM_006155	SEPT2#	13	12	38841
NM_001282973	SEPT2#	17	16	38167
NM_001282972	SEPT2#	14	13	38167
NM_004404	SEPT2#	13	12	38167
NM_015146	SEPT8#	10	9	21372
NM_001098813	SEPT8#	10	9	21866
NM_001098812	SEPT8#	10	9	21372
NM_001098811	SEPT8#	10	9	26560
NM_007165	SF3A2	9	8	11864
NM_001143676	SGK1	14	13	148814
NM_005627	SGK1	12	11	5652
NM_001143678	SGK1	12	11	6688
NM_001143677	SGK1	12	11	8628
NM_001024666	SH3KBP1	17	16	265836
NM_031892	SH3KBP1	18	17	353663
NM_001184960	SH3KBP1	13	12	137038
NM_133266	SHANK2	11	10	193964
NM_012309	SHANK2	23	22	621849
NM_003029	SHC1	13	12	12187
NM_001202859	SHC1	13	12	12187
NM_183001	SHC1	12	11	8451
NM_001130040	SHC1	12	11	8451
NM_001130041	SHC1	13	12	12187
NM_001145176	SHISA7	4	3	14127
NM_001282209	SIGMAR1	3	2	3106
NM_001282207	SIGMAR1	4	3	3106
NM_001282208	SIGMAR1	4	3	3106
NM_001282206	SIGMAR1	4	3	3106
NM_001282205	SIGMAR1	4	3	3106
NM_147157	SIGMAR1	3	2	3106
NM_005866	SIGMAR1	4	3	3106
NM_001174127	SLC11A2	17	16	46635
NM_001174129	SLC11A2	16	15	40151
NM_001174126	SLC11A2	17	16	46635
NM_001174125	SLC11A2	16	15	42285
NM_000617	SLC11A2	16	15	40426
NM_001174130	SLC11A2	15	14	23280
NM_001174128	SLC11A2	16	15	40426
NM_003058	SLC22A2	11	10	42171
NM_001151	SLC25A4	4	3	7123
NM_001152	SLC25A5	4	3	2998
NM_001859	SLC31A1	5	4	42966
NM_018976	SLC38A2	16	15	14676
NM_018231	SLC38A7	12	11	18378
NM_001258379	SLC4A7	25	24	111701
NM_003615	SLC4A7	25	24	84035
NM_001258380	SLC4A7	24	23	84035
NM_001206931	SLC6A12	15	14	24130
NM_001122847	SLC6A12	16	15	23622
NM_003044	SLC6A12	17	16	23372
NM_001122848	SLC6A12	16	15	24130
NM_016615	SLC6A13	15	14	42254
NM_001190997	SLC6A13	13	12	42254
NM_001243392	SLC6A13	2	1	3886
NM_022405	SLC6A20	10	9	41096
NM_020208	SLC6A20	11	10	41096
NM_021097	SLC8A1	10	9	318160
NM_001252624	SLC8A1	9	8	318160
NM_001112802	SLC8A1	8	7	400291
NM_001112801	SLC8A1	8	7	318160
NM_001112800	SLC8A1	9	8	318160
NM_182936	SLC8A3	5	4	36002
NM_182932	SLC8A3	7	6	144855
NM_183002	SLC8A3	8	7	144855
NM_033262	SLC8A3	8	7	144855
NM_001130417	SLC8A3	6	5	36002
NM_058240	SLC8A3	8	7	144855
NM_003047	SLC9A1	12	11	56323
NM_004252	SLC9A3R1	6	5	20750
NM_005903	SMAD5	8	7	49888
NM_001001420	SMAD5	7	6	49888
NM_001001419	SMAD5	9	8	49888
NM_001282875	SMARCA1	24	23	77006
NM_003069	SMARCA1	25	24	77006
NM_001282874	SMARCA1	25	24	77006
NM_130798	SNAP23	7	6	37757
NM_003825	SNAP23	8	7	37757
NM_001146055	SNCA	6	5	114199
NM_001146054	SNCA	6	5	112879
NM_007308	SNCA	5	4	112879
NM_000345	SNCA	6	5	113102
NM_001242935	SNCAIP	10	9	151976
NM_005460	SNCAIP	11	10	151976
NM_000454	SOD1	5	4	9310
NM_199436	SPAST	16	15	94028
NM_014946	SPAST	17	16	94028
NM_015001	SPEN	15	14	92593
NM_001127699	SPINK5	28	27	60970
NM_001127698	SPINK5	34	33	73392
NM_006846	SPINK5	33	32	73392
NM_181642	SPINT1	11	10	13609
NM_001032367	SPINT1	10	9	13212
NM_003710	SPINT1	11	10	13609
NM_001199021	SPON2	8	7	42031
NM_001128325	SPON2	7	6	6280
NM_012445	SPON2	6	5	5938
NM_003126	SPTA1	52	51	76012
NM_001024858	SPTB	35	34	76867
NM_000347	SPTB	31	30	56751
NM_003131	SRF	7	6	10326
NM_018984	SSH1	15	14	74895
NM_001161331	SSH1	13	12	35634
NM_001161330	SSH1	14	13	65666
NM_017857	SSH3	14	13	9161
NM_001048	SST	2	1	1509
NM_001049	SSTR1	3	2	5066
NM_001278687	SSTR3	2	1	6730
NM_001051	SSTR3	2	1	8141
NM_001052	SSTR4	1	0	1259
NM_006463	STAMBP	11	10	38183
NM_213622	STAMBP	10	9	38172
NM_201647	STAMBP	10	9	38254
NM_012108	STAP1	9	8	48172
NM_000349	STAR	7	6	8384
NM_007315	STAT1	25	24	45216
NM_139266	STAT1	23	22	38715
NM_015894	STMN3	5	4	13907
NM_001276310	STMN3	5	4	13063
NM_014574	STRN3	16	15	132604
NM_001083893	STRN3	18	17	132604
NM_001039877	STRN4	18	17	26954
NM_013403	STRN4	18	17	26954
NM_003764	STX11	2	1	41424
NM_001001850	STX19	2	1	14241
NM_001980	STX2	10	9	49676
NM_194356	STX2	11	10	49676
NM_001178040	STX3	10	9	50825
NM_004177	STX3	11	10	50825
NM_003850	SUCLA2	11	10	58673
NM_014979	SV2C	13	12	242113
NM_004710	SYNGR2	4	3	4340
NM_001178088	SYNJ2	26	25	82129
NM_003898	SYNJ2	27	26	117321
NM_015286	SYNM	5	4	30516
NM_145728	SYNM	4	3	30516
NM_007286	SYNPO	3	2	18587
NM_001109974	SYNPO	2	1	11698
NM_001166209	SYNPO	3	2	34699
NM_001166208	SYNPO	3	2	51263
NM_001040709	SYPL2	6	5	15666
NM_198992	SYT10	7	6	64408
NM_031912	SYT15	8	7	12722
NM_181519	SYT15	9	8	15159
NM_205848	SYT6	8	7	63150
NM_001270805	SYT6	8	7	64560
NM_138567	SYT8	9	8	3078
NM_032872	SYTL1	15	14	11942
NM_001193308	SYTL1	15	14	11942
NM_001242395	SYTL3	16	15	114864
NM_001242384	SYTL3	19	18	114864
NM_001242394	SYTL3	18	17	114864
NM_001009991	SYTL3	17	16	114864
NM_001059	TACR3	5	4	130350
NM_003189	TAL1	4	3	13483
NM_001287347	TAL1	5	4	15427
NM_001145909	TANC1	27	26	264026
NM_033394	TANC1	27	26	264026
NM_003192	TBCC	1	0	1652
NM_003193	TBCE	17	16	81610
NM_001287802	TBCE	16	15	81610
NM_001079515	TBCE	17	16	81610
NM_001287801	TBCE	18	17	81610
NM_013254	TBK1	21	20	50061
NM_001077653	TBX20	8	7	51671
NM_001166220	TBX20	6	5	22601
NM_013351	TBX21	6	5	12877
NM_005996	TBX3	7	6	13912
NM_016569	TBX3	8	7	13912
NM_004608	TBX6	9	8	6092
NM_003214	TEAD3	13	12	23489
NM_014253	TENM1	31	30	587912
NM_001163279	TENM1	32	31	587912
NM_001163278	TENM1	32	31	587912
NM_198253	TERT	16	15	41877
NM_001193376	TERT	15	14	41877
NM_003222	TFAP2C	7	6	9982
NM_003235	TG	48	47	267940
NM_000660	TGFB1	7	6	23404
NM_003239	TGFB3	7	6	23652
NM_006288	THY1	4	3	5593
NM_003253	TIAM1	29	28	440556
NM_020947	TLDC1	12	11	28353
NM_001143986	TLE6	17	16	17648
NM_024760	TLE6	16	15	17648
NM_003264	TLR2	3	2	21803
NM_018286	TMEM100	2	1	3239
NM_001099640	TMEM100	4	3	12496
NM_018374	TMEM106B	9	8	26044
NM_001134232	TMEM106B	8	7	26044
NM_025124	TMEM134	7	6	4931
NM_001078651	TMEM134	7	6	4931
NM_001078650	TMEM134	6	5	4931
NM_018247	TMEM30A	7	6	31996
NM_001143958	TMEM30A	6	5	31996
NM_032405	TMPRSS3	9	8	14217
NM_024022	TMPRSS3	13	12	24206
NM_032404	TMPRSS3	10	9	17264
NM_001256317	TMPRSS3	13	12	24206
NM_030770	TMPRSS5	13	12	18829
NM_001288751	TMPRSS5	13	12	18829
NM_001288750	TMPRSS5	12	11	18829
NM_001288749	TMPRSS5	10	9	18829
NM_001288752	TMPRSS5	11	10	18829
NM_181783	TMTC3	14	13	57593
NM_002160	TNC	28	27	98684
NM_016639	TNFRSF12A	4	3	2072
NM_001066	TNFRSF1B	10	9	42219
NM_014452	TNFRSF21	6	5	78422
NM_022093	TNN	19	18	80210
NM_000113	TOR1A	5	4	11222
NM_005426	TP53BP2	19	18	66081
NM_001031685	TP53BP2	18	17	66081
NM_003722	TP63	14	13	265854
NM_001114980	TP63	12	11	107621
NM_001114981	TP63	11	10	107621
NM_001114979	TP63	11	10	250070
NM_001114978	TP63	13	12	265854
NM_001114982	TP63	9	8	91837
NM_007030	TPPP	4	3	33535
NM_015049	TRAK2	16	15	74391
NM_145214	TRIM11	6	5	13142
NM_012210	TRIM32	2	1	14000
NM_001099679	TRIM32	2	1	14000
NM_014555	TRPM5	24	23	18531
NM_001177433	TRPV4	13	12	31742
NM_001177428	TRPV4	14	13	31742
NM_001177431	TRPV4	16	15	31711
NM_147204	TRPV4	14	13	31742
NM_021625	TRPV4	16	15	50322
NM_001272037	TSPEAR	13	12	213722
NM_144991	TSPEAR	12	11	213722
NM_001261835	TSPOAP1	32	31	27566
NM_004758	TSPOAP1	32	31	27566
NM_024418	TSPOAP1	31	30	27566
NM_000371	TTR	4	3	7258
NM_006009	TUBA1A	4	3	4531
NM_001270400	TUBA1A	4	3	4531
NM_001270399	TUBA1A	4	3	4531
NM_003322	TULP1	15	14	15030
NM_001289395	TULP1	14	13	15030
NM_001160408	TULP3	12	11	50275
NM_003324	TULP3	11	10	50275
NM_007284	TWF2	9	8	10559
NM_018227	UBA6	33	32	85412
NM_003350	UBE2V2	4	3	53461
NM_006048	UBE4B	27	26	148257
NM_001105562	UBE4B	28	27	148257
NM_015853	UBXN1	8	7	2621
NM_001286077	UBXN1	9	8	2621
NM_001286078	UBXN1	7	6	2621
NM_053049	UCN3	2	1	9195
NM_001184763	UHMK1	8	7	32457
NM_144624	UHMK1	7	6	31826
NM_175866	UHMK1	8	7	31826
NM_001080534	UNC13C	31	30	615707
NM_013387	UQCR10	2	1	3046
NM_001003684	UQCR10	2	1	3046
NM_003365	UQCRC1	13	12	10668
NM_003366	UQCRC2	14	13	30061
NM_006003	UQCRFS1	2	1	5971
NM_173477	USH1G	3	2	7184
NM_001282489	USH1G	3	2	7184
NM_007124	UTRN	74	73	561299
NM_001145149	VAMP7	7	6	62492
NM_001185183	VAMP7	7	6	62492
NM_005638	VAMP7	8	7	62492
NM_001185183	VAMP7	7	6	62492
NM_001145149	VAMP7	7	6	62492
NM_005638	VAMP7	8	7	62492
NM_003374	VDAC1	9	8	33260
NM_001184783	VDAC2	11	10	20909
NM_003375	VDAC2	10	9	20909
NM_001184823	VDAC2	10	9	21297
NM_003376	VEGFA	8	7	16279
NM_001033756	VEGFA	7	6	16279
NM_001171629	VEGFA	7	6	16279
NM_001025367	VEGFA	8	7	16279
NM_001025369	VEGFA	7	6	16279
NM_001171630	VEGFA	5	4	16279
NM_001171627	VEGFA	7	6	16279
NM_001171625	VEGFA	8	7	16279
NM_001171622	VEGFA	5	4	16279
NM_001171628	VEGFA	6	5	16279
NM_001171626	VEGFA	7	6	16279
NM_001171624	VEGFA	8	7	16279
NM_001171623	VEGFA	8	7	16279
NM_001025370	VEGFA	6	5	16279
NM_001025368	VEGFA	7	6	16279
NM_001025366	VEGFA	8	7	16279
NM_001204385	VEGFA	7	6	16279
NM_001204384	VEGFA	7	6	16279
NM_001287044	VEGFA	7	6	14503
NM_018206	VPS35	17	16	29557
NM_080607	VSTM2L	4	3	42250
NM_025132	WDR19	37	36	103408
NM_003390	WEE1	11	10	16087
NM_001143976	WEE1	11	10	15081
NM_001145853	WFS1	8	7	33417
NM_006005	WFS1	8	7	33417
NM_007191	WIF1	10	9	70944
NM_213655	WNK1	28	27	158531
NM_018979	WNK1	28	27	158531
NM_001184985	WNK1	28	27	158531
NM_014823	WNK1	26	25	158531
NM_025216	WNT10A	4	3	13398
NM_004626	WNT11	5	4	20206
NM_016087	WNT16	4	3	15739
NM_057168	WNT16	4	3	12070
NM_058244	WNT8A	6	5	7427
NM_003395	WNT9A	4	3	26513
NM_003396	WNT9B	4	3	25471
NM_000553	WRN	35	34	140501
NM_001079539	XBP1	6	5	6014
NM_005080	XBP1	5	4	6014
NM_021083	XK	3	2	46252
NM_015982	YBX2	9	8	6307
NM_006555	YKT6	7	6	13317
NM_015457	ZDHHC5	12	11	33187
NM_006965	ZNF24	4	3	12250
NM_001130967	ZNF385A	8	7	22165
		Average number of exons: 12	Average number of introns: 11	Average transcript length: 90154

## Sheet: 7238 non-neural gene length
Transcript name	Gene name	Number of exons	Number of introns	Transcript length (nt)
NM_130786	A1BG	8	7	6695
NM_000014	A2M	36	35	48256
NM_144670	A2ML1	36	35	54233
NM_001282424	A2ML1	25	24	31783
NM_001080438	A3GALT2	5	4	14334
NM_017436	A4GALT	3	2	28751
NM_016161	A4GNT	3	2	8671
NM_015665	AAAS	16	15	14174
NM_001173466	AAAS	15	14	14174
NM_001086	AADAC	5	4	14417
NM_207365	AADACL2	5	4	23854
NM_001103169	AADACL3	3	2	12610
NM_001103170	AADACL3	4	3	12610
NM_001013630	AADACL4	4	3	22533
NM_015511	AAR2	4	3	20526
NM_001271874	AAR2	4	3	20526
NM_001025357	AARD	2	1	5777
NM_020745	AARS2	22	21	14602
NM_001261434	AARSD1	12	11	13974
NM_181806	AASDH	15	14	49225
NM_001286672	AASDH	11	10	38550
NM_001286671	AASDH	12	11	49225
NM_001286669	AASDH	14	13	49225
NM_001286670	AASDH	12	11	49225
NM_001286668	AASDH	14	13	49225
NM_015423	AASDHPPT	6	5	21129
NM_005763	AASS	24	23	70748
NM_012138	AATF	12	11	107998
NM_080282	ABCA10	40	39	96810
NM_015657	ABCA12	45	44	100546
NM_173076	ABCA12	53	52	206887
NM_152701	ABCA13	62	61	476036
NM_001089	ABCA3	33	32	64870
NM_080284	ABCA6	39	38	63170
NM_019112	ABCA7	47	46	25470
NM_012089	ABCB10	13	12	42115
NM_003742	ABCB11	28	27	108386
NM_000443	ABCB4	28	27	73660
NM_018850	ABCB4	27	26	73660
NM_018849	ABCB4	28	27	73660
NM_178559	ABCB5	19	18	109673
NM_001163941	ABCB5	28	27	141394
NM_001163942	ABCB5	6	5	13053
NM_001163993	ABCB5	6	5	20223
NM_001198934	ABCC10	22	21	22873
NM_033450	ABCC10	20	19	18676
NM_032583	ABCC11	30	29	68268
NM_145186	ABCC11	29	28	68268
NM_033151	ABCC11	29	28	65362
NM_033226	ABCC12	29	28	63799
NM_000392	ABCC2	32	31	69201
NM_001171	ABCC6	31	30	73908
NM_001079528	ABCC6	2	1	2286
NM_020297	ABCC9	38	37	139306
NM_005691	ABCC9	38	37	131522
NM_001090	ABCF1	24	23	20141
NM_001025091	ABCF1	25	24	20141
NM_018358	ABCF3	21	20	7934
NM_022169	ABCG4	15	14	13626
NM_001142505	ABCG4	15	14	13077
NM_022437	ABCG8	13	12	39504
NM_018394	ABHD10	5	4	14494
NM_001272069	ABHD10	6	5	14494
NM_181814	ABHD12B	11	10	32812
NM_001206673	ABHD12B	13	12	32812
NM_032859	ABHD13	2	1	15842
NM_001146314	ABHD14B	4	3	6122
NM_032750	ABHD14B	4	3	6122
NM_001254753	ABHD14B	3	2	6122
NM_198147	ABHD15	2	1	6355
NM_021160	ABHD16A	20	19	16413
NM_001177515	ABHD16A	18	17	16126
NM_080622	ABHD16B	1	0	1777
NM_031213	ABHD17A	6	5	8545
NM_001130111	ABHD17A	5	4	8545
NM_021214	ABHD17C	3	2	60312
NM_007011	ABHD2	15	14	114212
NM_152924	ABHD2	11	10	114212
NM_020676	ABHD6	9	8	57204
NM_016428	ABI3	8	7	13000
NM_001135186	ABI3	8	7	13000
NM_015429	ABI3BP	35	34	244157
NM_173520	ABITRAM	3	2	3311
NM_002313	ABLIM1	22	21	227191
NM_001003408	ABLIM1	23	22	253547
NM_001003407	ABLIM1	22	21	253547
NM_006720	ABLIM1	17	16	95818
NM_001130088	ABLIM2	14	13	151813
NM_032432	ABLIM2	16	15	193524
NM_001286688	ABLIM2	15	14	106708
NM_001130087	ABLIM2	17	16	193524
NM_001130086	ABLIM2	18	17	193524
NM_001130085	ABLIM2	18	17	193524
NM_001130084	ABLIM2	20	19	193524
NM_001130083	ABLIM2	21	20	193524
NM_020469	ABO	7	6	20069
NM_139166	ABRA	2	1	10763
NM_139076	ABRAXAS1	9	8	24198
NM_032182	ABRAXAS2	9	8	34887
NM_198839	ACACA	60	59	324977
NM_198834	ACACA	56	55	324977
NM_198838	ACACA	55	54	214767
NM_198837	ACACA	54	53	214767
NM_198836	ACACA	56	55	274134
NM_001093	ACACB	52	51	128830
NM_001608	ACADL	11	10	37501
NM_001609	ACADSB	11	10	49379
NM_001033859	ACADVL	19	18	5438
NM_001270448	ACADVL	19	18	5438
NM_001270447	ACADVL	21	20	8144
NM_000018	ACADVL	20	19	5438
NM_013227	ACAN	18	17	71913
NM_001135	ACAN	16	15	71913
NM_014716	ACAP1	22	21	14947
NM_012287	ACAP2	23	22	168354
NM_000019	ACAT1	12	11	26635
NM_022735	ACBD3	8	7	42045
NM_024722	ACBD4	9	8	8531
NM_001135707	ACBD4	10	9	7314
NM_001135706	ACBD4	10	9	8531
NM_001135705	ACBD4	10	9	8531
NM_001135704	ACBD4	12	11	11578
NM_032592	ACCS	15	14	17759
NM_001127219	ACCS	15	14	17842
NM_001031854	ACCSL	14	13	11998
NM_001082487	ACD	12	11	3305
NM_001082486	ACD	12	11	3305
NM_022914	ACD	12	11	3305
NM_001178057	ACE	13	12	13565
NM_152830	ACE	14	13	13565
NM_000789	ACE	25	24	21321
NM_021804	ACE2	19	18	41038
NM_001010887	ACER2	6	5	43577
NM_018367	ACER3	11	10	162935
NM_138326	ACMSD	10	9	63418
NM_002197	ACO1	21	20	66233
NM_001278352	ACO1	22	21	66233
NM_001258406	ACOD1	4	3	6154
NM_001037161	ACOT1	3	2	6572
NM_130767	ACOT12	15	14	64043
NM_018473	ACOT13	3	2	38034
NM_001160094	ACOT13	4	3	38034
NM_006821	ACOT2	3	2	6601
NM_152331	ACOT4	3	2	4062
NM_001037162	ACOT6	2	1	3046
NM_005469	ACOT8	6	5	15690
NM_003501	ACOX3	18	17	74445
NM_001101667	ACOX3	17	16	74445
NM_001142807	ACOXL	18	17	385651
NM_033068	ACP4	11	10	4811
NM_001111036	ACP5	6	5	4328
NM_001111035	ACP5	7	6	4328
NM_001111034	ACP5	6	5	4119
NM_001611	ACP5	5	4	3080
NM_016361	ACP6	10	9	23468
NM_001004318	ACP7	13	12	27185
NM_001134194	ACPP	11	10	50937
NM_001099	ACPP	10	9	41481
NM_001097	ACR	5	4	7077
NM_032489	ACRBP	10	9	9340
NM_001612	ACRV1	4	3	8566
NM_020108	ACRV1	5	4	8566
NM_020107	ACRV1	5	4	8566
NM_020069	ACRV1	4	3	8566
NM_001284316	ACSF3	9	8	62039
NM_001243279	ACSF3	11	10	62039
NM_001127214	ACSF3	10	9	62039
NM_174917	ACSF3	11	10	62039
NM_203372	ACSL3	16	15	82389
NM_004457	ACSL3	17	16	82389
NM_016234	ACSL5	21	20	52184
NM_203380	ACSL5	21	20	53117
NM_203379	ACSL5	21	20	54224
NM_052956	ACSM1	13	12	68021
NM_001010845	ACSM2A	15	14	36134
NM_202000	ACSM3	9	8	22328
NM_005622	ACSM3	14	13	33169
NM_001080454	ACSM4	13	12	24043
NM_017888	ACSM5	14	13	31427
NM_001100	ACTA1	7	6	2852
NM_001613	ACTA2	9	8	17751
NM_001141945	ACTA2	9	8	56318
NM_001017992	ACTBL2	1	0	2795
NM_005159	ACTC1	7	6	7632
NM_001199893	ACTG2	8	7	26689
NM_001615	ACTG2	9	8	26689
NM_001024675	ACTL10	1	0	2029
NM_006687	ACTL7A	1	0	1529
NM_006686	ACTL7B	1	0	1408
NM_178525	ACTL9	1	0	1435
NM_001277140	ACTR3	12	11	70956
NM_005721	ACTR3	12	11	71620
NM_024855	ACTR5	9	8	23994
NM_022496	ACTR6	11	10	24339
NM_022899	ACTR8	13	12	15137
NM_138289	ACTRT1	1	0	1443
NM_080431	ACTRT2	1	0	1423
NM_032487	ACTRT3	2	1	2974
NM_080658	ACY3	8	7	8106
NM_203488	ACYP1	4	3	10810
NM_001107	ACYP1	3	2	10810
NM_138448	ACYP2	4	3	190027
NM_003815	ADAM15	21	20	11506
NM_001261465	ADAM15	21	20	11506
NM_207197	ADAM15	23	22	11506
NM_207196	ADAM15	23	22	11506
NM_207195	ADAM15	22	21	11506
NM_001261464	ADAM15	21	20	11506
NM_207194	ADAM15	22	21	11506
NM_207191	ADAM15	20	19	11506
NM_001261466	ADAM15	15	14	7413
NM_001190956	ADAM18	6	5	27009
NM_014237	ADAM18	20	19	145498
NM_001278114	ADAM2	20	19	94555
NM_001278113	ADAM2	20	19	94555
NM_001464	ADAM2	21	20	94555
NM_003814	ADAM20	2	1	12656
NM_014265	ADAM28	23	22	61148
NM_021777	ADAM28	14	13	42034
NM_001278126	ADAM29	6	5	59824
NM_001130705	ADAM29	3	2	59824
NM_001130704	ADAM29	4	3	59824
NM_001130703	ADAM29	4	3	59824
NM_014269	ADAM29	5	4	59824
NM_001278127	ADAM29	2	1	59824
NM_001278125	ADAM29	6	5	59824
NM_021794	ADAM30	1	0	2993
NM_145004	ADAM32	25	24	177388
NM_003817	ADAM7	22	21	68570
NM_014479	ADAMDEC1	14	13	21730
NM_001145272	ADAMDEC1	13	12	21730
NM_001145271	ADAMDEC1	15	14	21730
NM_006988	ADAMTS1	9	8	9124
NM_001282352	ADAMTS10	13	12	11958
NM_030957	ADAMTS10	26	25	30498
NM_030955	ADAMTS12	24	23	364839
NM_139027	ADAMTS13	29	28	37407
NM_139025	ADAMTS13	29	28	37407
NM_139026	ADAMTS13	29	28	37407
NM_080722	ADAMTS14	22	21	89638
NM_139155	ADAMTS14	22	21	89638
NM_139055	ADAMTS15	8	7	27672
NM_133638	ADAMTS19	23	22	278275
NM_005099	ADAMTS4	9	8	9309
NM_197941	ADAMTS6	25	24	333143
NM_014272	ADAMTS7	24	23	52230
NM_007037	ADAMTS8	9	8	23723
NM_001040272	ADAMTSL1	29	28	436870
NM_052866	ADAMTSL1	13	12	210875
NM_014694	ADAMTSL2	19	18	40668
NM_001145320	ADAMTSL2	19	18	43357
NM_207517	ADAMTSL3	30	29	385757
NM_025008	ADAMTSL4	15	14	9381
NM_001288608	ADAMTSL4	20	19	11569
NM_001288607	ADAMTSL4	20	19	11569
NM_019032	ADAMTSL4	19	18	11569
NM_213604	ADAMTSL5	12	11	8173
NM_012091	ADAT1	11	10	24976
NM_182503	ADAT2	6	5	27874
NM_001286259	ADAT2	6	5	19847
NM_138422	ADAT3	2	1	8077
NM_001142545	ADCK1	10	9	133873
NM_020421	ADCK1	11	10	133873
NM_052853	ADCK2	8	7	21957
NM_174922	ADCK5	15	14	20751
NM_001114	ADCY7	25	24	30224
NM_001286057	ADCY7	19	18	43991
NM_198827	ADGRD1	25	24	187558
NM_001256255	ADGRE1	18	17	52906
NM_001256254	ADGRE1	18	17	52906
NM_001256253	ADGRE1	20	19	52906
NM_001256252	ADGRE1	20	19	52906
NM_001974	ADGRE1	21	20	52906
NM_001025160	ADGRE5	19	18	27583
NM_001784	ADGRE5	18	17	27583
NM_078481	ADGRE5	20	19	27583
NM_025048	ADGRF1	8	7	22462
NM_153840	ADGRF1	15	14	42271
NM_153839	ADGRF2	11	10	41209
NM_001145168	ADGRF3	13	12	9107
NM_001145169	ADGRF3	13	12	10931
NM_153835	ADGRF3	12	11	38646
NM_153838	ADGRF4	10	9	23470
NM_001098518	ADGRF5	21	20	69474
NM_170776	ADGRG3	12	11	21135
NM_153834	ADGRG4	26	25	115927
NM_153837	ADGRG5	12	11	34501
NM_032787	ADGRG7	16	15	85892
NM_022159	ADGRL4	15	14	117048
NM_000667	ADH1A	9	8	14664
NM_000668	ADH1B	9	8	15057
NM_001286650	ADH1B	10	9	15057
NM_000669	ADH1C	9	8	16270
NM_144650	ADHFE1	14	13	36328
NM_001018082	ADIG	3	2	7268
NM_032804	ADO	1	0	3725
NM_001081976	ADORA3	6	5	80629
NM_020683	ADORA3	6	5	20775
NM_000677	ADORA3	2	1	4694
NM_031284	ADPGK	7	6	32420
NM_001125	ADPRH	5	4	10271
NM_199162	ADPRHL1	7	6	27204
NM_138430	ADPRHL1	7	6	31586
NM_017825	ADPRHL2	6	5	5082
NM_020233	ADPRM	4	3	13950
NM_001126	ADSS	13	12	43644
NM_199165	ADSSL1	13	12	17421
NM_152328	ADSSL1	13	12	23115
NM_032744	ADTRP	6	5	65394
NM_001143948	ADTRP	7	6	65394
NM_001129	AEBP1	21	20	10206
NM_022767	AEN	4	3	10987
NM_001287824	AFAP1L2	20	19	109956
NM_032550	AFAP1L2	19	18	109956
NM_001001936	AFAP1L2	19	18	109956
NM_005935	AFF1	20	19	134040
NM_001166693	AFF1	21	20	206054
NM_002025	AFF2	21	20	500056
NM_001169125	AFF2	20	19	500056
NM_001169124	AFF2	20	19	500056
NM_001169122	AFF2	20	19	500056
NM_001169123	AFF2	21	20	500056
NM_001170628	AFF2	18	17	281580
NM_002285	AFF3	24	23	595323
NM_001025108	AFF3	24	23	558331
NM_014423	AFF4	21	20	88285
NM_145315	AFG1L	13	12	228155
NM_001133	AFM	15	14	22258
NM_001134	AFP	15	14	19568
NM_024758	AGMAT	7	6	13413
NM_001004320	AGMO	13	12	361699
NM_006411	AGPAT1	7	6	7935
NM_032741	AGPAT1	7	6	9907
NM_001012727	AGPAT2	5	4	14318
NM_006412	AGPAT2	6	5	14318
NM_020133	AGPAT4	9	8	144052
NM_018361	AGPAT5	8	7	53145
NM_006408	AGR2	8	7	12476
NM_176813	AGR3	8	7	22585
NM_001040195	AGTRAP	4	3	14688
NM_001040197	AGTRAP	6	5	14688
NM_001040196	AGTRAP	6	5	14688
NM_001040194	AGTRAP	5	4	14688
NM_020350	AGTRAP	5	4	14688
NM_000030	AGXT	11	10	10376
NM_031900	AGXT2	14	13	50036
NM_020731	AHRR	12	11	134116
NM_001242412	AHRR	11	10	134116
NM_001622	AHSG	7	6	8259
NM_016633	AHSP	3	2	923
NM_020661	AICDA	5	4	10682
NM_016108	AIG1	6	5	279503
NM_001286587	AIG1	7	6	280982
NM_001286589	AIG1	4	3	129762
NM_001286588	AIG1	4	3	129762
NM_004833	AIM2	6	5	14374
NM_000383	AIRE	14	13	12383
NM_001080482	AJM1	1	0	2932
NM_000476	AK1	7	6	11265
NM_016283	AK6	5	4	17858
NM_001015891	AK6	5	4	18289
NM_001145128	AK9	41	40	198358
NM_145025	AK9	12	11	59517
NM_001145194	AKAIN1	2	1	53585
NM_016248	AKAP11	13	12	51116
NM_001008535	AKAP14	4	3	7686
NM_001008534	AKAP14	6	5	24745
NM_178813	AKAP14	7	6	24745
NM_005088	AKAP17A	5	4	10927
NM_005088	AKAP17A	5	4	10927
NM_001198656	AKAP2	5	4	123915
NM_001004065	AKAP2	4	3	123915
NM_001136562	AKAP2	4	3	47012
NM_001278309	AKAP3	6	5	33541
NM_006422	AKAP3	6	5	33541
NM_139289	AKAP4	6	5	9586
NM_003886	AKAP4	6	5	10255
NM_152763	AKNAD1	16	15	41208
NM_020299	AKR1B10	10	9	13824
NM_001353	AKR1C1	9	8	14706
NM_001818	AKR1C4	9	8	22114
NM_003689	AKR7A2	7	6	9440
NM_012067	AKR7A3	7	6	6225
NM_001012398	AKTIP	10	9	11980
NM_022476	AKTIP	10	9	11980
NM_199166	ALAS1	11	10	16246
NM_000688	ALAS1	12	11	16246
NM_000692	ALDH1B1	2	1	6003
NM_000691	ALDH3A1	11	10	10450
NM_001135168	ALDH3A1	10	9	7476
NM_001135167	ALDH3A1	11	10	7629
NM_001031806	ALDH3A2	11	10	28842
NM_000382	ALDH3A2	10	9	28846
NM_001030010	ALDH3B1	9	8	18955
NM_001161473	ALDH3B1	10	9	20697
NM_000694	ALDH3B1	10	9	18955
NM_001080	ALDH5A1	10	9	42240
NM_170740	ALDH5A1	11	10	42240
NM_022568	ALDH8A1	7	6	32734
NM_001193480	ALDH8A1	6	5	32734
NM_170771	ALDH8A1	6	5	32734
NM_000696	ALDH9A1	11	10	36453
NM_000035	ALDOB	9	8	15222
NM_001013620	ALG10B	3	2	12973
NM_017621	ALKBH4	3	2	8656
NM_198867	ALKBH6	7	6	5120
NM_032878	ALKBH6	7	6	5121
NM_032306	ALKBH7	4	3	2819
NM_000697	ALOX12	14	13	14673
NM_001139	ALOX12B	15	14	15069
NM_001141	ALOX15B	14	13	10095
NM_001039131	ALOX15B	12	11	10095
NM_001039130	ALOX15B	13	12	10095
NM_001629	ALOX5AP	5	4	28922
NM_001204406	ALOX5AP	6	5	50952
NM_001165960	ALOXE3	16	15	23018
NM_021628	ALOXE3	16	15	22644
NM_031313	ALPG	11	10	3874
NM_001190707	ALS2CL	26	25	24663
NM_147129	ALS2CL	26	25	24711
NM_182775	ALS2CL	11	10	8416
NM_001127391	ALS2CR12	15	14	68956
NM_139163	ALS2CR12	15	14	68956
NM_006492	ALX3	4	3	10327
NM_016519	AMBN	13	12	15031
NM_001142	AMELX	6	5	7350
NM_182681	AMELX	5	4	7350
NM_182680	AMELX	7	6	7350
NM_001164691	AMHR2	9	8	7681
NM_020547	AMHR2	11	10	7681
NM_001164690	AMHR2	11	10	7681
NM_001199140	AMMECR1L	8	7	24309
NM_031445	AMMECR1L	8	7	23229
NM_030943	AMN	12	11	8188
NM_001278412	AMN1	9	8	58039
NM_001278411	AMN1	7	6	58039
NM_001113402	AMN1	7	6	58039
NM_133265	AMOT	12	11	65940
NM_001113490	AMOT	11	10	48251
NM_001286731	AMTN	9	8	14173
NM_212557	AMTN	9	8	14173
NM_001008218	AMY1B	11	10	8849
NM_001008218	AMY1B	11	10	8849
NM_001008218	AMY1B	11	10	8850
NM_001008219	AMY1C	11	10	8871
NM_001008219	AMY1C	11	10	8872
NM_001008219	AMY1C	11	10	8871
NM_133463	AMZ1	7	6	35916
NM_001284355	AMZ1	6	5	27236
NM_001278494	ANAPC15	6	5	2647
NM_001278493	ANAPC15	6	5	2687
NM_001278492	ANAPC15	6	5	2687
NM_001278491	ANAPC15	6	5	2713
NM_001278490	ANAPC15	5	4	3191
NM_001278489	ANAPC15	6	5	3191
NM_001278488	ANAPC15	6	5	3191
NM_001278487	ANAPC15	6	5	3191
NM_001278486	ANAPC15	6	5	3191
NM_001278485	ANAPC15	6	5	3191
NM_014042	ANAPC15	6	5	3191
NM_173473	ANAPC16	4	3	19862
NM_001242548	ANAPC16	3	2	19862
NM_001242547	ANAPC16	4	3	19862
NM_001242546	ANAPC16	5	4	19862
NM_144567	ANGEL2	9	8	23646
NM_015985	ANGPT4	9	8	43665
NM_014495	ANGPTL3	7	6	8820
NM_178127	ANGPTL5	9	8	25850
NM_018687	ANGPTL8	4	3	2326
NM_001191054	ANHX	9	8	17526
NM_144708	ANKAR	23	22	70667
NM_001276713	ANKDD1B	14	13	60372
NM_153228	ANKFN1	17	16	329173
NM_054027	ANKH	12	11	166980
NM_001278445	ANKLE1	9	8	6003
NM_152363	ANKLE1	9	8	6003
NM_001278444	ANKLE1	8	7	6003
NM_001278443	ANKLE1	9	8	6003
NM_001282771	ANKMY1	18	17	78601
NM_016552	ANKMY1	17	16	78601
NM_017844	ANKMY1	14	13	78601
NM_001282780	ANKMY1	14	13	78601
NM_001282781	ANKMY1	17	16	78601
NM_152345	ANKRD13B	15	14	21254
NM_207354	ANKRD13D	15	14	13195
NM_001009943	ANKRD16	6	5	11812
NM_001009941	ANKRD16	7	6	11812
NM_019046	ANKRD16	8	7	28173
NM_147195	ANKRD18A	16	15	49001
NM_001244752	ANKRD18B	16	15	48592
NM_001129981	ANKRD2	8	7	11387
NM_020349	ANKRD2	9	8	11387
NM_032250	ANKRD20A1	15	14	43081
NM_001012421	ANKRD20A2	15	14	43121
NM_001012421	ANKRD20A2	15	14	43109
XR_002958558	ANKRD20A21P	13	12	42812
NM_001012419	ANKRD20A3	15	14	43540
NM_001012419	ANKRD20A3	15	14	43528
NM_001012419	ANKRD20A3	15	14	43500
NM_001098805	ANKRD20A4	15	14	43130
NM_144994	ANKRD23	9	8	6109
NM_014915	ANKRD26	34	33	96384
NM_001256053	ANKRD26	34	33	96384
NM_001195098	ANKRD28	28	27	130949
NM_015199	ANKRD28	28	27	192311
NM_001195099	ANKRD28	26	25	89316
NM_052997	ANKRD30A	36	35	106712
NM_001145029	ANKRD30B	36	35	104500
NM_001164443	ANKRD31	25	24	168583
NM_001039888	ANKRD34A	4	3	5141
NM_001004441	ANKRD34B	5	4	13732
NM_001146341	ANKRD34C	2	1	15437
NM_025190	ANKRD36B	44	43	85169
NM_001310154	ANKRD36C	89	88	142902
NM_181726	ANKRD37	5	4	3552
NM_052855	ANKRD40	5	4	14721
NM_182603	ANKRD42	10	9	54724
NM_001195144	ANKRD44	28	27	324137
NM_153697	ANKRD44	10	9	211328
NM_017704	ANKRD49	3	2	5593
NM_173595	ANKRD52	28	27	20554
NM_024933	ANKRD53	7	6	7056
NM_001115116	ANKRD53	6	5	7056
NM_024669	ANKRD55	12	11	133681
NM_001304369	ANKRD60	4	3	12528
NM_001271700	ANKRD61	3	2	5178
NM_001277333	ANKRD62	14	13	35902
NM_001145210	ANKRD65	4	3	3026
NM_001243536	ANKRD65	3	2	3026
NM_001243535	ANKRD65	3	2	3026
NM_001162435	ANKRD66	5	4	12302
NM_019644	ANKRD7	7	6	18074
NM_152326	ANKRD9	4	3	2932
NM_145865	ANKS4B	2	1	18736
NM_173551	ANKS6	15	14	64505
NM_001144960	ANKUB1	6	5	31722
NM_001282792	ANKZF1	11	10	6914
NM_001042410	ANKZF1	14	13	6783
NM_018089	ANKZF1	14	13	6914
NM_001204832	ANO10	12	11	255744
NM_001204833	ANO10	11	10	255744
NM_018075	ANO10	13	12	255744
NM_001204834	ANO10	12	11	255744
NM_001204831	ANO10	13	12	255744
NM_001001891	ANO7	25	24	36869
NM_001001666	ANO7	4	3	7658
NM_001012302	ANO9	23	22	24083
NM_012403	ANP32C	1	0	706
NM_058172	ANTXR2	17	16	171708
NM_001286781	ANTXR2	17	16	171708
NM_001286780	ANTXR2	17	16	171857
NM_001145794	ANTXR2	16	15	95817
NM_001278688	ANTXRL	17	16	43212
NM_145868	ANXA11	16	15	50450
NM_145869	ANXA11	17	16	50450
NM_001157	ANXA11	15	14	50450
NM_001278409	ANXA11	17	16	50450
NM_001278408	ANXA11	17	16	49369
NM_001278407	ANXA11	17	16	50555
NM_004306	ANXA13	11	10	56615
NM_001003954	ANXA13	12	11	56615
NM_001014279	ANXA2R	1	0	1267
NM_001153	ANXA4	13	12	84471
NM_001154	ANXA5	13	12	28997
NM_001155	ANXA6	26	25	57178
NM_001193544	ANXA6	25	24	40951
NM_001278923	ANXA8L1	10	9	16192
NM_001278924	ANXA8L1	9	8	16192
NM_001098845	ANXA8L1	12	11	16192
NM_003568	ANXA9	14	13	13617
NM_001177507	AOAH	20	19	211607
NM_001177506	AOAH	22	21	211607
NM_001637	AOAH	21	20	211607
NM_001272072	AOC1	5	4	8816
NM_001091	AOC1	5	4	8816
NM_018569	AP1AR	10	9	38318
NM_001128426	AP1AR	9	8	38318
NM_001039569	AP1S3	5	4	82274
NM_004069	AP2S1	5	4	12782
NM_021575	AP2S1	4	3	12782
NM_006594	AP4B1	11	10	10372
NM_001253853	AP4B1	11	10	10372
NM_001253852	AP4B1	10	9	10156
NM_007347	AP4E1	21	20	97230
NM_001252127	AP4E1	21	20	97230
NM_138368	AP5B1	2	1	6695
NM_018229	AP5M1	8	7	21193
NM_014855	AP5Z1	17	16	18766
NM_004886	APBA3	11	10	10904
NM_133172	APBB3	12	11	6338
NM_133174	APBB3	12	11	6338
NM_133173	APBB3	12	11	6338
NM_006051	APBB3	12	11	6338
NM_001639	APCS	2	1	1047
NM_015957	APIP	7	6	34117
NM_173545	APLF	10	9	112605
NM_152426	APOBEC3D	7	6	12140
NM_001166004	APOBEC3H	4	3	5383
NM_001166003	APOBEC3H	6	5	6845
NM_001166002	APOBEC3H	5	4	6845
NM_181773	APOBEC3H	5	4	6845
NM_018690	APOBR	4	3	4323
NM_000040	APOC3	4	3	3165
NM_001646	APOC4	3	2	3260
NM_000042	APOH	8	7	17411
NM_030882	APOL2	5	4	13436
NM_145637	APOL2	6	5	13747
NM_145642	APOL3	4	3	25856
NM_145641	APOL3	5	4	25856
NM_145640	APOL3	3	2	20608
NM_030642	APOL5	5	4	11612
NM_030641	APOL6	3	2	20034
NM_030817	APOLD1	2	1	5860
NM_001130415	APOLD1	2	1	65550
NM_001256169	APOM	6	5	5802
NM_019101	APOM	6	5	2318
NM_024122	APOO	9	8	74594
NM_198450	APOOL	9	8	89427
NM_032374	APOPT1	5	4	27939
NM_080429	AQP10	6	5	4211
NM_198998	AQP12A	4	3	6640
NM_001102467	AQP12B	3	2	6484
NM_001651	AQP5	4	3	4188
NM_001652	AQP6	4	3	4304
NM_001170	AQP7	8	7	17571
NM_001169	AQP8	6	5	11970
NM_020980	AQP9	6	5	47704
NM_001040118	ARAP1	35	34	67322
NM_015242	ARAP1	33	32	37291
NM_001135190	ARAP1	31	30	37291
NM_015230	ARAP2	33	32	178361
NM_001655	ARCN1	10	9	30647
NM_001142281	ARCN1	9	8	30647
NM_001039479	AREL1	20	19	51854
NM_001012659	ARGFX	5	4	22693
NM_033515	ARHGAP18	15	14	133132
NM_020809	ARHGAP20	16	15	135694
NM_001258418	ARHGAP20	15	14	136155
NM_001258417	ARHGAP20	15	14	135694
NM_001258416	ARHGAP20	16	15	136155
NM_001258415	ARHGAP20	15	14	135016
NM_021226	ARHGAP22	10	9	159110
NM_001256026	ARHGAP22	8	7	47626
NM_001256025	ARHGAP22	10	9	206495
NM_001256024	ARHGAP22	10	9	159110
NM_001199417	ARHGAP23	24	23	83910
NM_199282	ARHGAP27	17	16	31746
NM_001282290	ARHGAP27	17	16	36397
NM_174919	ARHGAP27	4	3	3566
NM_001025598	ARHGAP30	12	11	23030
NM_001287600	ARHGAP30	11	10	23030
NM_001287602	ARHGAP30	8	7	23030
NM_181720	ARHGAP30	13	12	23030
NM_144967	ARHGAP36	12	11	31643
NM_001282607	ARHGAP36	12	11	31645
NM_001164431	ARHGAP40	15	14	48720
NM_006125	ARHGAP6	11	10	522306
NM_013427	ARHGAP6	13	12	528160
NM_013423	ARHGAP6	13	12	128434
NM_001287242	ARHGAP6	13	12	290244
NM_001198726	ARHGAP8	11	10	110228
NM_001017526	ARHGAP8	13	12	110228
NM_181335	ARHGAP8	12	11	110228
NM_032496	ARHGAP9	18	17	7597
NM_001080157	ARHGAP9	16	15	7388
NM_001080156	ARHGAP9	16	15	5692
NM_014786	ARHGEF17	21	20	60764
NM_153213	ARHGEF19	16	15	14507
NM_001145451	ARHGEF33	16	15	56088
NM_001242729	ARHGEF38	14	13	128295
NM_017700	ARHGEF38	4	3	79062
NM_032818	ARHGEF39	9	8	5939
NM_001278530	ARHGEF40	23	22	19989
NM_001278529	ARHGEF40	24	23	19989
NM_018071	ARHGEF40	24	23	19989
NM_004840	ARHGEF6	22	21	115793
NM_152641	ARID2	21	20	178201
NM_001017363	ARID3C	7	6	6558
NM_006321	ARIH2	16	15	66692
NM_173664	ARL10	4	3	8003
NM_025047	ARL14	1	0	1289
NM_001195581	ARL14EPL	3	2	7666
NM_019087	ARL15	5	4	425791
NM_001040025	ARL16	5	4	2732
NM_001113738	ARL17A	4	3	26897
NM_016632	ARL17A	5	4	62665
NM_001288813	ARL17A	4	3	52635
NM_001113738	ARL17A	4	3	26968
NM_001288811	ARL17A	5	4	52635
NM_001288812	ARL17A	5	4	71043
NM_016632	ARL17A	5	4	63022
NM_001288811	ARL17A	3	2	11129
NM_001288813	ARL17A	2	1	1799
NM_001039083	ARL17B	4	3	22372
NM_001103154	ARL17B	4	3	62223
NM_012106	ARL2BP	6	5	8509
NM_012097	ARL5A	6	5	27531
NM_001037174	ARL5A	6	5	27531
NM_177985	ARL5A	6	5	27531
NM_016638	ARL6IP4	6	5	2855
NM_001278379	ARL6IP4	6	5	2855
NM_001278378	ARL6IP4	6	5	2855
NM_001002252	ARL6IP4	5	4	2855
NM_001002251	ARL6IP4	6	5	2855
NM_018694	ARL6IP4	6	5	2855
NM_001278380	ARL6IP4	6	5	2855
NM_001286576	ARMC12	6	5	11883
NM_001286574	ARMC12	6	5	11883
NM_145028	ARMC12	6	5	11883
NM_173081	ARMC3	19	18	110501
NM_001282747	ARMC3	16	15	110501
NM_001282746	ARMC3	17	16	86465
NM_001282745	ARMC3	19	18	110501
NR_138082	ARMC4P1	5	4	76294
NM_024742	ARMC5	4	3	8173
NM_001105247	ARMC5	6	5	8173
NM_001288767	ARMC5	8	7	8896
NM_024585	ARMC7	3	2	20280
NM_213654	ARMC8	13	12	59641
NM_001267042	ARMC8	21	20	111140
NM_001267041	ARMC8	21	20	111140
NM_001282342	ARMC8	20	19	111140
NM_014154	ARMC8	13	12	59641
NM_015396	ARMC8	23	22	111140
NM_001256155	ARMCX4	2	1	7769
NM_001168485	ARMCX5	5	4	4991
NM_022838	ARMCX5	3	2	4661
NM_001168482	ARMCX5	3	2	4661
NM_001168480	ARMCX5	6	5	4991
NM_001168479	ARMCX5	6	5	4991
NM_001168478	ARMCX5	4	3	4661
NM_001009584	ARMCX6	2	1	2885
NM_019007	ARMCX6	3	2	2885
NM_001184768	ARMCX6	4	3	2885
NM_001145636	ARMH1	12	11	50871
NM_001282492	ARMH2	2	1	1577
NM_024541	ARMH3	26	25	210578
NM_001001872	ARMH4	8	7	148041
NM_001099667	ARMS2	2	1	2691
NM_001286562	ARMT1	4	3	17843
NM_024573	ARMT1	5	4	17843
NM_001282380	ARPIN	6	5	16157
NM_182616	ARPIN	6	5	16460
NM_001080523	ARRDC5	3	2	12432
NM_001201538	ARSF	11	10	72497
NM_001201539	ARSF	11	10	71260
NM_004042	ARSF	11	10	45932
NM_001012301	ARSI	2	1	6618
NM_198150	ARSK	8	7	49983
NM_004314	ART1	5	4	19287
NM_021071	ART4	3	2	14170
NM_001079536	ART5	5	4	3812
NM_053017	ART5	4	3	3751
NM_022786	ARV1	6	5	21658
NM_020682	AS3MT	11	10	32447
NM_019893	ASAH2	20	19	61372
NM_001143974	ASAH2	19	18	61372
NM_001143778	ASAP3	24	23	55696
NM_017707	ASAP3	25	24	55696
NM_001040445	ASB1	5	4	25267
NM_080871	ASB10	6	5	12136
NM_001142459	ASB10	6	5	11695
NM_001142460	ASB10	5	4	11695
NM_130388	ASB12	3	2	6441
NM_024701	ASB13	6	5	27740
NM_001142733	ASB14	11	10	24333
NM_130387	ASB14	4	3	10603
NM_080928	ASB15	10	9	28822
NM_080863	ASB16	5	4	8379
NM_080868	ASB17	3	2	13560
NM_212556	ASB18	6	5	69475
NM_016150	ASB2	8	7	23270
NM_001202429	ASB2	10	9	42579
NM_016116	ASB4	5	4	54332
NM_145872	ASB4	3	2	42902
NM_017873	ASB6	6	5	7567
NM_001202403	ASB6	5	4	7567
NM_177999	ASB6	5	4	7567
NM_024095	ASB8	4	3	9807
NM_024087	ASB9	7	6	26186
NM_001168531	ASB9	8	7	26482
NM_001168530	ASB9	7	6	26186
NM_001031739	ASB9	7	6	26186
NM_001242906	ASCC2	19	18	49698
NM_032204	ASCC2	20	19	49698
NM_001270601	ASCL5	1	0	1421
NM_014034	ASF1A	4	3	15096
NM_001671	ASGR1	9	8	6134
NM_001197216	ASGR1	8	7	6134
NM_001201352	ASGR2	9	8	13491
NM_080914	ASGR2	8	7	12990
NM_080913	ASGR2	9	8	13491
NM_080912	ASGR2	9	8	13491
NM_001181	ASGR2	9	8	13491
NM_017419	ASIC5	10	9	36546
NM_001672	ASIP	3	2	8979
NM_019048	ASNSD1	6	5	9434
NM_001114598	ASPDH	7	6	2287
NM_001024656	ASPDH	5	4	3092
NM_001080464	ASPG	16	15	27025
NM_020437	ASPHD2	4	3	15700
NM_001002036	ASTL	9	8	14588
NM_030632	ASXL3	12	11	168860
NM_130768	ASZ1	13	12	64303
NM_017552	ATAD2B	28	27	178404
NM_001242338	ATAD2B	28	27	178404
NM_031921	ATAD3B	16	15	24420
NM_001039211	ATAD3C	12	11	20471
NM_024997	ATF7IP2	12	11	97585
NM_001256160	ATF7IP2	12	11	97585
NM_001131028	ATG10	9	8	283374
NM_031482	ATG10	8	7	283374
NM_001142673	ATG13	18	17	58744
NM_001205122	ATG13	15	14	58744
NM_001205121	ATG13	17	16	58744
NM_001205119	ATG13	18	17	58744
NM_001205120	ATG13	17	16	58744
NM_014741	ATG13	17	16	58744
NM_014924	ATG14	10	9	45469
NM_033388	ATG16L2	18	17	15231
NM_015104	ATG2A	41	40	22720
NM_018036	ATG2B	42	41	82085
NM_052936	ATG4A	13	12	63004
NM_178270	ATG4A	12	11	63004
NM_024085	ATG9A	15	14	10310
NM_001077198	ATG9A	16	15	10310
NM_173681	ATG9B	17	16	12291
NM_022374	ATL2	13	12	82405
NM_001135673	ATL2	13	12	82405
NM_024490	ATP10A	21	20	184491
NM_025153	ATP10B	26	25	289094
NM_020453	ATP10D	23	22	108095
NM_207440	ATP11AUN	3	2	37455
NM_014616	ATP11B	30	29	128132
NM_024524	ATP13A3	32	31	65567
NM_173201	ATP2A1	22	21	26023
NM_004320	ATP2A1	23	22	26023
NM_001286075	ATP2A1	21	20	24468
NM_001681	ATP2A2	21	20	69867
NM_170665	ATP2A2	20	19	69867
NM_001199183	ATP2C1	28	27	122652
NM_001199182	ATP2C1	27	26	166188
NM_001199181	ATP2C1	27	26	152679
NM_001199180	ATP2C1	28	27	166188
NM_001199185	ATP2C1	27	26	122265
NM_001199184	ATP2C1	27	26	109143
NM_014382	ATP2C1	27	26	108756
NM_001199179	ATP2C1	28	27	109213
NM_001001485	ATP2C1	28	27	122698
NM_001001487	ATP2C1	28	27	122123
NM_001001486	ATP2C1	28	27	122123
NM_014861	ATP2C2	27	26	95662
NM_001286527	ATP2C2	28	27	95662
NM_006886	ATP5F1E	3	2	3691
NM_032747	ATP5MD	5	4	7463
NM_001206427	ATP5MD	5	4	7463
NM_001206426	ATP5MD	4	3	7463
NM_007100	ATP5ME	4	3	1904
NM_006476	ATP5MG	3	2	8460
NM_001127393	ATP5MPL	5	4	9280
NM_004894	ATP5MPL	4	3	9280
NM_001685	ATP5PF	4	3	11176
NM_001003697	ATP5PF	4	3	11176
NM_001003696	ATP5PF	4	3	11176
NM_001003703	ATP5PF	4	3	11176
NM_001003701	ATP5PF	4	3	11176
NM_001165877	ATP6MGL	1	0	800
NM_001195150	ATP6V1FNB	2	1	5718
NM_006095	ATP8A1	37	36	248732
NM_001105529	ATP8A1	36	35	248732
NM_020452	ATP8B2	28	27	23506
NM_001005855	ATP8B2	12	11	12288
NM_024837	ATP8B4	28	27	260986
NM_198531	ATP9B	30	29	308887
NM_145691	ATPAF2	8	7	21148
NM_199133	ATPSCKMT	5	4	24403
NM_001258389	ATPSCKMT	5	4	24403
NM_001258388	ATPSCKMT	4	3	24403
NM_080592	ATRAID	7	6	5149
NM_001170795	ATRAID	7	6	4829
NM_016085	ATRAID	7	6	4829
NM_130384	ATRIP	13	12	18942
NM_032166	ATRIP	12	11	18942
NM_001271022	ATRIP	14	13	18942
NM_001271023	ATRIP	13	12	18559
NM_007245	ATXN2L	22	21	14191
NM_148415	ATXN2L	23	22	14191
NM_148414	ATXN2L	24	23	14191
NM_148416	ATXN2L	23	22	14191
NM_017492	ATXN2L	23	22	14191
NM_145714	ATXN2L	23	22	14191
NM_020725	ATXN7L1	12	11	271812
NM_138495	ATXN7L1	10	9	74390
NM_152749	ATXN7L1	4	3	116397
NM_020218	ATXN7L3	12	11	6358
NM_001098833	ATXN7L3	12	11	6358
NM_021732	AVPI1	3	2	9836
NM_001013579	AWAT1	7	6	6008
NM_001002254	AWAT2	8	7	9398
NM_144696	AXDND1	26	25	189017
NM_001185	AZGP1	4	3	9387
NM_001700	AZU1	5	4	4188
NM_001277155	B3GALNT2	8	7	39570
NM_152490	B3GALNT2	12	11	57278
NM_198540	B3GNT8	3	2	3373
NM_033309	B3GNT9	2	1	2899
NM_001009905	B3GNTL1	13	12	108021
NM_001159388	B4GALNT2	11	10	37531
NM_001159387	B4GALNT2	11	10	37222
NM_153446	B4GALNT2	11	10	37024
NM_173593	B4GALNT3	20	19	101517
NM_178537	B4GALNT4	20	19	12324
NM_030578	B9D2	4	3	9758
NM_001288756	BABAM1	9	8	11979
NM_001033549	BABAM1	9	8	11979
NM_001288757	BABAM1	6	5	11979
NM_014173	BABAM1	9	8	11979
NM_001172415	BAG1	7	6	12291
NM_004323	BAG1	7	6	12291
NM_004282	BAG2	3	2	12910
NM_001204878	BAG4	4	3	36715
NM_004874	BAG4	5	4	36715
NM_025045	BAIAP2L2	14	13	25782
NM_001143985	BANF1	3	2	2069
NM_003860	BANF1	3	2	2069
NM_178477	BANF2	4	3	35926
NM_001014977	BANF2	3	2	35926
NM_001159495	BANF2	3	2	42199
NM_001127507	BANK1	16	15	284207
NM_017935	BANK1	17	16	284207
NM_001083907	BANK1	17	16	260988
NM_079837	BANP	13	12	125888
NM_001173541	BANP	12	11	125888
NM_001173539	BANP	13	12	125888
NM_001173540	BANP	13	12	125888
NM_001173543	BANP	14	13	107302
NM_001173542	BANP	13	12	117449
NM_017869	BANP	12	11	125888
NM_004656	BAP1	17	16	9103
NM_006399	BATF	3	2	24552
NM_018664	BATF3	3	2	13570
NM_001195306	BBIP1	4	3	20208
NM_001195305	BBIP1	4	3	20638
NM_001195304	BBIP1	5	4	20638
NM_001243783	BBIP1	3	2	20638
NM_001195307	BBIP1	3	2	20638
NM_025057	BBOF1	12	11	46739
NM_024685	BBS10	2	1	3958
NM_001178007	BBS12	3	2	12243
NM_152618	BBS12	2	1	12243
NM_001008405	BCAP29	8	7	42560
NM_018844	BCAP29	8	7	43342
NM_001256447	BCAP31	8	7	24256
NM_005745	BCAP31	8	7	23893
NM_001139457	BCAP31	8	7	23611
NM_001139441	BCAP31	8	7	23637
NM_003567	BCAR3	12	11	120053
NM_001261409	BCAR3	12	11	119585
NM_001261408	BCAR3	14	13	285365
NM_001261410	BCAR3	10	9	52361
NM_001010974	BCAS4	4	3	82285
NM_017843	BCAS4	6	5	82285
NM_198799	BCAS4	5	4	82285
NM_181708	BCDIN3D	2	1	7088
NM_001040668	BCL2L12	7	6	8776
NM_138639	BCL2L12	7	6	8776
NM_001282521	BCL2L12	4	3	8776
NM_001282520	BCL2L12	5	4	8776
NM_001282519	BCL2L12	6	5	8776
NM_001282517	BCL2L12	5	4	8776
NM_001282516	BCL2L12	6	5	8776
NM_138722	BCL2L14	6	5	28227
NM_138723	BCL2L14	6	5	28751
NM_030766	BCL2L14	6	5	28227
NM_001010922	BCL2L15	4	3	10735
NM_001707	BCL7B	6	5	21384
NM_001197244	BCL7B	5	4	21384
NM_001286526	BCL7C	6	5	60263
NM_004765	BCL7C	6	5	6509
NM_182557	BCL9L	8	7	14764
NM_017429	BCMO1	11	10	52453
NM_001256400	BCO2	11	10	42562
NM_001256397	BCO2	12	11	42562
NM_031938	BCO2	12	11	43443
NM_001256398	BCO2	10	9	43443
NM_001037290	BCO2	12	11	42562
NM_000623	BDKRB2	3	2	39533
NM_018429	BDP1	39	38	112209
NM_001197225	BEAN1	5	4	66234
NM_001197224	BEAN1	5	4	66234
NM_001178020	BEAN1	5	4	55547
NM_001136106	BEAN1	4	3	55547
NM_001080450	BEND3	5	4	49253
NM_001159547	BEND4	6	5	42027
NM_207406	BEND4	6	5	42027
NM_024603	BEND5	6	5	49009
NM_001100912	BEND7	8	7	61890
NM_152751	BEND7	9	8	64494
NM_001282614	BEST3	10	9	55910
NM_032735	BEST3	10	9	45809
NM_152439	BEST3	6	5	35670
NM_001282616	BEST3	4	3	16177
NM_001282613	BEST3	8	7	45809
NM_001282615	BEST3	3	2	16177
NM_153274	BEST4	9	8	4171
NM_005868	BET1	4	3	12692
NM_016526	BET1L	3	2	4500
NM_001098787	BET1L	4	3	4500
NM_014380	BEX3	1	0	985
NM_001282674	BEX3	2	1	1843
NM_206917	BEX3	3	2	1843
NM_206915	BEX3	3	2	1843
NM_001127688	BEX4	2	1	2110
NM_001080425	BEX4	3	2	2110
NM_001012978	BEX5	3	2	2309
NM_001159560	BEX5	3	2	2085
NM_016561	BFAR	8	7	36427
NM_001164405	BHLHA9	1	0	709
NM_001103175	BICDL2	9	8	7676
NM_015349	BICRAL	12	11	47504
NM_016293	BIN2	13	12	43118
NM_018688	BIN3	9	8	48716
NM_139317	BIRC7	7	6	4626
NM_022161	BIRC7	7	6	4626
NM_033341	BIRC8	1	0	2023
NM_001001786	BLID	1	0	863
NM_014482	BMP10	2	1	6038
NM_181809	BMP8A	7	6	38225
NM_001720	BMP8B	7	6	30632
NM_014753	BMS1	23	22	52433
NM_152556	BMT2	5	4	120732
NM_004330	BNIP2	10	9	26582
NM_001159642	BNIPL	10	9	11049
NM_138278	BNIPL	10	9	11049
NM_148894	BOD1L1	26	25	58964
NM_001257964	BOD1L2	1	0	3348
NM_001031827	BOLA2	3	2	1373
NM_001031827	BOLA2	3	2	1373
NM_001039182	BOLA2B	3	2	1373
NM_001039182	BOLA2B	3	2	1373
NM_058169	BORCS5	4	3	109820
NM_017622	BORCS6	1	0	1915
NM_001725	BPI	15	14	33355
NM_001042439	BPIFA3	6	5	10498
NM_178466	BPIFA3	7	6	10498
NM_033197	BPIFB1	16	15	26745
NM_025227	BPIFB2	16	15	16133
NM_182658	BPIFB3	15	14	18206
NM_182519	BPIFB4	16	15	30241
NM_174897	BPIFB6	15	14	12401
NM_174932	BPIFC	15	14	43541
NM_152743	BRAT1	14	13	17950
NM_001009877	BRD9	16	15	28826
NM_023924	BRD9	16	15	29091
NM_080626	BRI3BP	3	2	32157
NM_018321	BRIX1	10	9	9969
NM_032352	BRMS1L	10	9	45574
NM_015695	BRPF3	13	12	36019
NM_153252	BRWD3	41	40	140248
NM_057176	BSND	4	3	9850
NM_001128326	BSPH1	6	5	24126
NM_017688	BSPRY	6	5	21703
NM_004335	BST2	5	4	2711
NM_025238	BTBD1	8	7	50927
NM_001011885	BTBD1	7	6	50927
NM_144587	BTBD16	16	15	66857
NM_001145101	BTBD18	3	2	8269
NM_001136537	BTBD19	8	7	5649
NM_001002860	BTBD7	11	10	95544
NM_001289133	BTBD7	9	8	95544
NM_018167	BTBD7	4	3	45466
NM_183242	BTBD8	9	8	67541
NM_001172418	BTBD9	11	10	427618
NM_052893	BTBD9	12	11	471699
NM_001099272	BTBD9	11	10	471699
NM_152733	BTBD9	10	9	427618
NM_181780	BTLA	5	4	35597
NM_001085357	BTLA	4	3	35597
NM_001732	BTN1A1	7	6	9159
NM_001197234	BTN2A1	8	7	18719
NM_007049	BTN2A1	8	7	11751
NM_001197233	BTN2A1	7	6	11751
NM_078476	BTN2A1	8	7	11751
NM_006995	BTN2A2	8	7	11773
NM_001197237	BTN2A2	8	7	11663
NM_001197240	BTN2A2	7	6	11773
NM_001197239	BTN2A2	6	5	11773
NM_001197238	BTN2A2	8	7	11778
NM_181531	BTN2A2	7	6	11773
NM_007048	BTN3A1	10	9	12981
NM_001145009	BTN3A1	10	9	12981
NM_001145008	BTN3A1	10	9	12981
NM_194441	BTN3A1	10	9	12981
NM_001197247	BTN3A2	11	10	13163
NM_007047	BTN3A2	11	10	13163
NM_001197249	BTN3A2	10	9	13163
NM_001197248	BTN3A2	9	8	13163
NM_001197246	BTN3A2	9	8	10144
NM_006994	BTN3A3	11	10	12945
NM_197974	BTN3A3	10	9	12945
NM_001242803	BTN3A3	6	5	12945
NM_001287262	BTNL10	3	2	1931
NM_019602	BTNL2	6	5	12389
NM_197975	BTNL3	8	7	17884
NM_001159709	BTNL8	8	7	51831
NM_024850	BTNL8	8	7	51831
NM_001159710	BTNL8	7	6	41344
NM_001159708	BTNL8	7	6	51831
NM_001159707	BTNL8	7	6	51831
NM_001040462	BTNL8	8	7	51831
NM_152547	BTNL9	11	10	21300
NM_001159736	BUD13	10	9	24830
NM_032725	BUD13	10	9	24830
NM_007073	BVES	8	7	39846
NM_001199563	BVES	8	7	40352
NM_147147	BVES	8	7	39524
NM_001114101	C1QC	3	2	4487
NM_172369	C1QC	3	2	4487
NM_198594	C1QTNF1	3	2	25714
NM_198593	C1QTNF1	4	3	15491
NM_030968	C1QTNF1	4	3	25714
NM_153372	C1QTNF1	4	3	26856
NM_001014980	C1QTNF12	8	7	4278
NM_031908	C1QTNF2	3	2	22875
NM_030945	C1QTNF3	6	5	25410
NM_181435	C1QTNF3	6	5	25410
NM_031910	C1QTNF6	3	2	8126
NM_182486	C1QTNF6	4	3	8126
NM_031911	C1QTNF7	3	2	18164
NM_001135171	C1QTNF7	3	2	71618
NM_001135170	C1QTNF7	3	2	106233
NM_207419	C1QTNF8	5	4	8020
NM_001007537	C1QTNF9B	3	2	5909
NM_001733	C1R	9	8	57530
NM_016546	C1RL	6	5	14725
NM_001734	C1S	12	11	10357
NM_201442	C1S	12	11	10357
NM_001282457	C2	14	13	47891
NM_001282458	C2	18	17	18199
NM_001178063	C2	14	13	44677
NM_001145903	C2	16	15	18199
NM_000063	C2	18	17	18199
NM_001282459	C2	6	5	7583
NM_199050	C2CD2	13	12	41582
NM_015500	C2CD2	14	13	68782
NM_001286577	C2CD3	33	32	158307
NM_015531	C2CD3	31	30	136589
NM_207322	C2CD4A	2	1	3942
NM_001007595	C2CD4B	2	1	1747
NM_001136263	C2CD4C	2	1	3729
NM_001136003	C2CD4D	2	1	2696
NM_014802	C2CD5	25	24	96002
NM_001286177	C2CD5	27	26	96002
NM_001286176	C2CD5	27	26	96002
NM_001286175	C2CD5	28	27	96002
NM_001286174	C2CD5	26	25	96002
NM_001286173	C2CD5	28	27	96002
NM_001168221	C2CD6	16	15	131763
NM_152525	C2CD6	15	14	131763
NM_001168216	C2CD6	13	12	131763
NM_001168217	C2CD6	13	12	84864
NM_000716	C4BPB	6	5	10755
NM_001017367	C4BPB	7	6	10711
NM_001017366	C4BPB	7	6	11127
NM_001017365	C4BPB	7	6	11127
NM_001017364	C4BPB	6	5	10755
NM_018485	C5AR2	2	1	5012
NM_001271749	C5AR2	2	1	9870
NM_001271750	C5AR2	2	1	1530
NM_001115131	C6	18	17	119294
NM_000065	C6	18	17	71449
NM_000587	C7	18	17	73445
NM_000562	C8A	11	10	63453
NM_001278544	C8B	13	12	36932
NM_001278543	C8B	13	12	36932
NM_000066	C8B	12	11	36932
NM_000606	C8G	7	6	1730
NM_024828	CAAP1	6	5	52145
NM_001167575	CAAP1	6	5	52145
NM_173554	CABCOCO1	7	6	103374
NM_031215	CABLES2	10	9	18655
NM_033122	CABS1	2	1	2164
NM_012189	CABYR	6	5	22646
NM_138643	CABYR	4	3	22646
NM_138644	CABYR	6	5	22118
NM_153770	CABYR	6	5	22646
NM_153769	CABYR	6	5	22646
NM_153768	CABYR	5	4	22646
NM_017586	CACFD1	5	4	10824
NM_001242369	CACFD1	6	5	10824
NM_001242370	CACFD1	5	4	10824
NM_001135775	CACFD1	4	3	10824
NM_153810	CACUL1	9	8	74266
NM_205864	CAGE1	11	10	63057
NM_001170693	CAGE1	13	12	60614
NM_001170692	CAGE1	14	13	63057
NM_001261393	CALCOCO2	12	11	34259
NM_001261390	CALCOCO2	14	13	34259
NM_001261395	CALCOCO2	12	11	34259
NM_005831	CALCOCO2	13	12	34259
NM_001261391	CALCOCO2	14	13	34259
NM_001129742	CALHM3	3	2	6438
NM_001256887	CALHM4	4	3	29857
NM_001256888	CALHM4	4	3	29857
NM_001256889	CALHM4	3	2	29857
NM_153036	CALHM4	3	2	29857
NM_153711	CALHM5	2	1	6903
NM_001276460	CALHM6	2	1	2403
NM_001010919	CALHM6	3	2	2403
NM_005185	CALML3	1	0	1303
NM_017422	CALML5	1	0	877
NM_138705	CALML6	6	5	2469
NM_024766	CAMKMT	11	10	410690
NM_004345	CAMP	4	3	2146
NM_018448	CAND1	15	14	45329
NM_012298	CAND2	13	12	38144
NM_001162499	CAND2	15	14	38144
NM_007058	CAPN11	23	22	25593
NM_144691	CAPN12	21	20	14284
NM_144575	CAPN13	23	22	84675
NM_001145122	CAPN14	22	21	44491
NM_005632	CAPN15	14	13	26782
NM_001143962	CAPN8	17	16	138466
NM_016452	CAPN9	19	18	54590
NM_006615	CAPN9	20	19	54390
NM_001749	CAPNS1	11	10	10339
NM_001003962	CAPNS1	11	10	10339
NM_032330	CAPNS2	1	0	1010
NM_080590	CAPS	5	4	2031
NM_004058	CAPS	5	4	2031
NM_001286548	CAPS2	18	17	113704
NM_001286549	CAPS2	11	10	113704
NM_032606	CAPS2	18	17	54079
NM_001286547	CAPS2	16	15	54079
NM_001042625	CAPSL	5	4	34341
NM_144647	CAPSL	5	4	34485
NM_006135	CAPZA1	10	9	52168
NM_033328	CAPZA3	1	0	1079
NM_014550	CARD10	20	19	28812
NM_032415	CARD11	25	24	137871
NM_024110	CARD14	21	20	30825
NM_052819	CARD14	10	9	11126
NM_001257970	CARD14	15	14	24125
NM_001007232	CARD17	4	3	8964
NM_021571	CARD18	3	2	2015
NM_032310	CARD19	6	5	17117
NM_001184902	CARD8	13	12	47862
NM_001184904	CARD8	4	3	17687
NM_001184901	CARD8	11	10	41763
NM_001184900	CARD8	11	10	32979
NM_001184903	CARD8	11	10	41763
NM_014959	CARD8	12	11	41763
NM_052814	CARD9	13	12	9727
NM_052813	CARD9	13	12	9727
NM_024744	CARF	17	16	74269
NM_001104586	CARF	16	15	74269
NM_001282910	CARF	15	14	74269
NM_001282912	CARF	14	13	74269
NM_001282911	CARF	16	15	74269
NM_001173977	CARMIL1	37	36	341104
NM_017640	CARMIL1	37	36	341104
NM_152420	CARNMT1	8	7	45439
NM_001010911	CASC10	2	1	2794
NM_001142643	CASKIN2	19	18	9630
NM_020753	CASKIN2	20	19	15325
NM_012114	CASP14	7	6	8814
NR_132322	CASP16P	10	9	5656
NM_012115	CASP8AP2	10	9	44538
NM_001137667	CASP8AP2	10	9	44538
NM_001137668	CASP8AP2	10	9	44538
NM_001231	CASQ1	11	10	11393
NM_001232	CASQ2	11	10	68802
NM_001178065	CASR	7	6	102165
NM_000388	CASR	7	6	102816
NM_001037666	CASTOR1	9	8	4511
NM_053054	CATSPER1	12	11	9767
NM_172095	CATSPER2	13	12	18281
NM_001282309	CATSPER2	14	13	18285
NM_054020	CATSPER2	13	12	18281
NM_172097	CATSPER2	5	4	9407
NM_001282310	CATSPER2	13	12	18285
NM_178019	CATSPER3	8	7	43803
NM_152784	CATSPERD	22	21	58056
NM_001130957	CATSPERE	22	21	178991
NM_001242340	CATSPERE	19	18	178991
NM_173807	CATSPERE	21	20	178991
NM_021185	CATSPERG	29	28	35148
NM_001039496	CATSPERZ	5	4	4378
NM_001234	CAV3	3	2	12967
NM_033337	CAV3	2	1	12967
NM_012232	CAVIN1	2	1	20873
NM_145040	CAVIN3	2	1	1566
NM_001018116	CAVIN4	2	1	10310
NM_005142	CBLIF	9	8	16230
NM_024814	CBLL1	6	5	17972
NM_001284291	CBLL1	6	5	17972
NM_152577	CBLL2	1	0	1548
NM_018491	CBWD1	15	14	58039
NM_001145356	CBWD1	14	13	58039
NM_001145355	CBWD1	16	15	58039
NM_172003	CBWD2	15	14	58515
NM_201453	CBWD3	15	14	58095
NM_201453	CBWD3	15	14	58179
NM_001085457	CBWD6	15	14	58057
NM_014292	CBX6	5	4	8012
NM_001164444	CBY3	2	1	2418
NM_001080522	CC2D2A	38	37	131693
NM_001164720	CC2D2A	5	4	12400
NM_020785	CC2D2A	7	6	12400
NM_001159747	CC2D2B	12	11	32595
NM_001001732	CC2D2B	9	8	32595
NM_018237	CCAR1	25	24	71235
NM_001282959	CCAR1	24	23	71235
NM_001282960	CCAR1	24	23	71235
NM_133459	CCBE1	11	10	266475
NM_024781	CCDC102B	8	7	257111
NM_001093729	CCDC102B	10	9	339937
NM_173482	CCDC105	7	6	12546
NM_001195201	CCDC107	6	5	3215
NM_001195217	CCDC107	5	4	3215
NM_001195200	CCDC107	6	5	3215
NM_174923	CCDC107	5	4	3215
NM_001145411	CCDC110	6	5	26577
NM_152775	CCDC110	7	6	26577
NM_152549	CCDC112	10	9	29104
NM_001040440	CCDC112	10	9	29575
NM_032357	CCDC115	5	4	4452
NM_152612	CCDC116	5	4	4532
NM_001284263	CCDC117	4	3	16629
NM_173510	CCDC117	5	4	16629
NM_001284264	CCDC117	4	3	16629
NM_001284265	CCDC117	5	4	16166
NM_024584	CCDC121	2	1	3394
NM_001142683	CCDC121	2	1	3241
NM_144974	CCDC122	7	6	43339
NM_176816	CCDC125	11	10	39893
NM_138771	CCDC126	4	3	47331
NM_144719	CCDC13	16	15	64873
NM_144978	CCDC138	15	14	89630
NM_022757	CCDC14	12	11	47983
NM_153038	CCDC140	2	1	7072
NM_032779	CCDC142	9	8	10400
NM_014695	CCDC144A	18	17	84674
NM_001004306	CCDC144NL	4	3	32747
NM_020879	CCDC146	19	18	172589
NM_173463	CCDC149	13	12	174089
NM_001130726	CCDC149	12	11	106863
NM_025004	CCDC15	16	15	87370
NM_001080539	CCDC150	28	27	93176
NM_001134848	CCDC152	9	8	45621
NM_001145018	CCDC153	7	6	5623
NM_001143980	CCDC154	17	16	10103
NM_144688	CCDC155	20	19	29783
NM_001017437	CCDC157	12	11	20193
NM_001042784	CCDC158	24	23	94268
NM_001080503	CCDC159	11	10	8441
NM_001101357	CCDC160	2	1	8733
NM_001162914	CCDC166	2	1	1417
NM_138493	CCDC167	4	3	17005
NM_001146197	CCDC168	4	3	29707
NM_001198908	CCDC169	8	7	70815
NM_001144983	CCDC169	7	6	70815
NM_001144982	CCDC169	7	6	70815
NM_001144981	CCDC169	8	7	67082
NM_001144986	CCDC169	7	6	67082
NM_001144985	CCDC169	7	6	67082
NM_001144984	CCDC169	6	5	70815
NM_001190182	CCDC17	13	12	4017
NM_001114938	CCDC17	13	12	4017
NM_025059	CCDC170	11	10	127155
NM_198515	CCDC172	9	8	55603
NM_001085447	CCDC173	9	8	48998
NM_001164399	CCDC175	20	19	71766
NM_001271507	CCDC177	2	1	5071
NM_001105528	CCDC178	22	21	502681
NM_198995	CCDC178	22	21	503321
NM_001195637	CCDC179	4	3	13506
NM_206886	CCDC18	28	27	98008
NM_001282544	CCDC182	1	0	850
NM_001039374	CCDC183	14	13	11405
NM_001013635	CCDC184	1	0	2345
NM_152610	CCDC185	1	0	2099
NM_001014979	CCDC189	9	8	4823
NM_001195620	CCDC189	4	3	2209
NM_178550	CCDC190	4	3	14520
NM_014008	CCDC22	17	16	15062
NM_152492	CCDC27	12	11	19246
NM_052849	CCDC32	4	3	12146
NM_001080792	CCDC32	4	3	12146
NM_001080791	CCDC32	4	3	12146
NM_001289132	CCDC32	4	3	33718
NM_025055	CCDC33	19	18	99854
NM_001287181	CCDC33	8	7	17602
NM_182791	CCDC33	9	8	17602
NM_080654	CCDC34	3	2	14378
NM_030771	CCDC34	6	5	24736
NM_001135197	CCDC36	8	7	58606
NM_178173	CCDC36	10	9	59678
NM_182496	CCDC38	16	15	75604
NM_001158261	CCDC42	6	5	14910
NM_144681	CCDC42	7	6	14910
NM_024661	CCDC51	4	3	7951
NM_001256967	CCDC51	4	3	7951
NM_001256966	CCDC51	4	3	7951
NM_001256965	CCDC51	4	3	7951
NM_001256964	CCDC51	4	3	7951
NM_001256968	CCDC51	4	3	7951
NM_001256969	CCDC51	4	3	7951
NM_032600	CCDC54	1	0	1295
NM_198082	CCDC57	17	16	111345
NM_014167	CCDC59	4	3	6118
NM_001267723	CCDC61	14	13	23157
NM_201435	CCDC62	13	12	52873
NM_001286243	CCDC63	11	10	60577
NM_001286244	CCDC63	10	9	60577
NM_152591	CCDC63	12	11	60577
NM_015621	CCDC69	9	8	43043
NM_024688	CCDC7	23	22	315143
NM_001026383	CCDC7	18	17	128484
NM_145023	CCDC7	18	17	128484
NM_031290	CCDC70	2	1	4257
NM_022903	CCDC71	2	1	3819
NM_175884	CCDC71L	1	0	4425
NM_001008391	CCDC73	18	17	192580
NM_032358	CCDC77	13	12	41067
NM_001130148	CCDC77	11	10	53292
NM_001130147	CCDC77	12	11	53292
NM_001130146	CCDC77	12	11	41067
NM_001031737	CCDC78	14	13	3893
NM_032040	CCDC8	1	0	3335
NM_001156474	CCDC81	15	14	48375
NM_021827	CCDC81	14	13	48375
NM_001286159	CCDC83	11	10	64921
NM_173556	CCDC83	12	11	64921
NM_198489	CCDC84	11	10	17661
NM_024098	CCDC86	4	3	9134
NM_018219	CCDC87	1	0	2916
NM_032251	CCDC88B	27	26	17318
NM_021825	CCDC90B	9	8	27317
NM_001286120	CCDC90B	7	6	27317
NM_001286118	CCDC90B	8	7	27317
NM_001286117	CCDC90B	9	8	27317
NM_001286116	CCDC90B	9	8	27317
NM_001286119	CCDC90B	9	8	27317
NM_001355573	CCDC92B	6	5	28852
NM_052848	CCDC97	5	4	14696
NM_207380	CCDC9B	11	10	9517
NM_005893	CCIN	1	0	1944
NM_002981	CCL1	3	2	2907
NM_002986	CCL11	3	2	2514
NM_032963	CCL14	3	2	3074
NM_032962	CCL14	4	3	3074
NM_032965	CCL15	4	3	4468
NM_004590	CCL16	3	2	4990
NM_006274	CCL19	4	3	1709
NM_001130046	CCL20	4	3	3724
NM_004591	CCL20	4	3	3724
NM_002990	CCL22	3	2	7409
NM_145898	CCL23	4	3	4911
NM_005064	CCL23	4	3	4911
NM_002991	CCL24	3	2	1921
NM_006072	CCL26	4	3	20224
NM_006664	CCL27	3	2	798
NM_148672	CCL28	3	2	30890
NM_001001437	CCL3L3	3	2	1881
NM_001001437	CCL3L3	3	2	1881
NM_005623	CCL8	3	2	2357
NM_001554	CCN1	5	4	3206
NM_003881	CCN5	4	3	12569
NM_012142	CCNDBP1	11	10	11911
NM_001039780	CCNI2	6	5	6960
NM_001287252	CCNI2	6	5	6960
NM_001287253	CCNI2	6	5	6960
NM_001282854	CCNY	8	7	235798
NM_145012	CCNY	10	9	235798
NM_181698	CCNY	12	11	325691
NM_001282853	CCNY	11	10	235798
NM_001282852	CCNY	9	8	235798
NM_001142300	CCNYL1	8	7	44634
NM_152523	CCNYL1	11	10	44634
NM_016602	CCR10	2	1	2427
NM_001837	CCR3	3	2	24327
NM_178329	CCR3	2	1	24327
NM_001164680	CCR3	3	2	24327
NM_178328	CCR3	3	2	24327
NM_001009186	CCT6A	13	12	12306
NM_001762	CCT6A	14	13	12306
NM_006584	CCT6B	14	13	33652
NM_001193530	CCT6B	13	12	33652
NM_001193529	CCT6B	13	12	33652
NM_014406	CCT8L2	1	0	2054
NM_198097	CCZ1B	15	14	27362
NM_001256111	CD101	10	9	34803
NM_001256109	CD101	10	9	34803
NM_001256106	CD101	10	9	34803
NM_004258	CD101	10	9	34803
NM_001039490	CD151	8	7	5885
NM_004357	CD151	9	8	5885
NM_139030	CD151	8	7	5885
NM_139029	CD151	9	8	5885
NM_174941	CD163L1	20	19	89194
NM_020406	CD177	9	8	9657
NM_005582	CD180	3	2	14515
NM_001763	CD1A	6	5	4133
NM_001764	CD1B	6	5	3583
NM_001765	CD1C	6	5	5003
NM_001185115	CD1E	5	4	3859
NM_001185114	CD1E	5	4	3859
NM_001185113	CD1E	4	3	3859
NM_001042584	CD1E	6	5	3859
NM_001042583	CD1E	6	5	3859
NM_001042586	CD1E	4	3	3859
NM_001042585	CD1E	6	5	3859
NM_030893	CD1E	6	5	3859
NM_001185112	CD1E	4	3	3859
NM_001042587	CD1E	4	3	3859
NM_001185108	CD1E	5	4	3859
NM_001185107	CD1E	5	4	3859
NM_001185110	CD1E	4	3	3859
NM_001008784	CD200R1L	6	5	30243
NM_001199215	CD200R1L	7	6	30243
NM_015717	CD207	6	5	5612
NM_021155	CD209	7	6	7585
NM_001144899	CD209	7	6	7585
NM_001144897	CD209	7	6	7585
NM_001144896	CD209	6	5	7585
NM_001144895	CD209	7	6	7585
NM_001144894	CD209	5	4	7585
NM_001144893	CD209	5	4	7585
NM_001278417	CD22	13	12	18193
NM_001185099	CD22	13	12	18194
NM_001185101	CD22	12	11	18194
NM_001771	CD22	14	13	18194
NM_001185100	CD22	13	12	18194
NM_006566	CD226	7	6	94041
NM_016382	CD244	9	8	32744
NM_001166664	CD244	8	7	32744
NM_001166663	CD244	9	8	32744
NM_020404	CD248	1	0	2559
NM_006139	CD28	4	3	32440
NM_001243077	CD28	4	3	32440
NM_001243078	CD28	3	2	32440
NM_012120	CD2AP	18	17	149473
NM_006110	CD2BP2	7	6	4597
NM_001243646	CD2BP2	6	5	4170
NM_007261	CD300A	7	6	18417
NM_001256841	CD300A	6	5	18417
NM_006678	CD300C	4	3	5107
NM_181449	CD300E	4	3	13877
NM_001324073	CD300H	5	4	10284
NM_174892	CD300LB	4	3	10302
NM_001115152	CD300LD	4	3	12261
NM_001289082	CD300LF	7	6	18694
NM_001289083	CD300LF	8	7	18694
NM_001289084	CD300LF	7	6	18694
NM_001289085	CD300LF	8	7	18694
NM_001289086	CD300LF	7	6	18694
NM_001289087	CD300LF	6	5	18694
NM_139018	CD300LF	7	6	18694
NM_001168323	CD300LG	6	5	11088
NM_001168322	CD300LG	7	6	11088
NM_145273	CD300LG	7	6	16483
NM_001168324	CD300LG	6	5	10614
NM_001165895	CD320	4	3	6231
NM_016579	CD320	5	4	6231
NM_001177608	CD33	7	6	10888
NM_001082618	CD33	6	5	14941
NM_001772	CD33	7	6	14941
NM_001040651	CD3D	4	3	3672
NM_000732	CD3D	5	4	3672
NM_000733	CD3E	9	8	11597
NM_000073	CD3G	7	6	9440
NM_001778	CD48	4	3	33107
NM_001256030	CD48	3	2	31431
NM_014207	CD5	11	10	25395
NM_001803	CD52	2	1	2605
NM_000560	CD53	8	7	26838
NM_001040033	CD53	9	8	28739
NM_001114752	CD55	11	10	39496
NM_000574	CD55	10	9	39496
NM_001144822	CD58	5	4	52395
NM_001779	CD58	6	5	56561
NM_001781	CD69	5	4	8417
NM_006137	CD7	4	3	2736
NM_001252	CD70	3	2	5315
NM_001040280	CD83	5	4	19285
NM_001251901	CD83	5	4	19663
NM_004233	CD83	5	4	19285
NM_001145873	CD8A	9	8	23793
NM_001768	CD8A	6	5	7111
NM_171827	CD8A	5	4	7111
NM_001178100	CD8B	4	3	46589
NM_004931	CD8B	6	5	20360
NM_172213	CD8B	6	5	46589
NM_172102	CD8B	5	4	46589
NM_172101	CD8B	7	6	46589
NM_030911	CDADC1	10	9	45577
NM_001193478	CDADC1	10	9	45577
NM_006023	CDC123	13	12	54630
NM_001145734	CDC20B	11	10	60208
NM_001170402	CDC20B	12	11	60208
NM_152623	CDC20B	12	11	60208
NM_139286	CDC26	4	3	8581
NM_017913	CDC37L1	7	6	27030
NM_006449	CDC42EP3	2	1	30319
NM_001270437	CDC42EP3	2	1	30319
NM_001270438	CDC42EP3	2	1	30319
NM_001270436	CDC42EP3	2	1	30655
NM_145057	CDC42EP5	3	2	8230
NM_001038702	CDC42SE2	5	4	130682
NM_020240	CDC42SE2	6	5	130682
NM_001127370	CDCA7L	11	10	45027
NM_001127371	CDCA7L	9	8	45027
NM_018719	CDCA7L	10	9	45027
NM_178181	CDCP1	4	3	36208
NM_022842	CDCP1	9	8	64150
NM_201546	CDCP2	4	3	14013
NM_004933	CDH15	14	13	23739
NM_001204746	CDH16	17	16	10864
NM_001204745	CDH16	18	17	10864
NM_001204744	CDH16	18	17	10864
NM_004062	CDH16	18	17	10864
NM_001144663	CDH17	18	17	90139
NM_004063	CDH17	18	17	81423
NM_021810	CDH26	6	5	16753
NM_177980	CDH26	18	17	54699
NM_001171976	CDHR2	32	31	53259
NM_017675	CDHR2	32	31	46428
NM_152750	CDHR3	19	18	73222
NM_001007540	CDHR4	19	18	9089
NM_031264	CDHR5	14	13	8504
NM_021924	CDHR5	15	14	8504
NM_001171968	CDHR5	15	14	8504
NM_024011	CDK11A	20	19	21623
NM_033529	CDK11A	20	19	21623
NM_033493	CDK11B	20	19	84677
NM_033492	CDK11B	20	19	84677
NM_033489	CDK11B	21	20	84677
NM_033488	CDK11B	21	20	84677
NM_033487	CDK11B	18	17	84677
NM_033486	CDK11B	20	19	84677
NM_001261435	CDK15	14	13	88973
NM_001261436	CDK15	13	12	82875
NM_139158	CDK15	14	13	89123
NM_001039803	CDK20	8	7	8338
NM_012119	CDK20	7	6	8338
NM_178432	CDK20	7	6	8338
NM_001170640	CDK20	6	5	8338
NM_001170639	CDK20	7	6	8338
NM_017774	CDKAL1	16	15	697948
NM_080656	CDKN2AIPNL	3	2	9844
NM_207327	CDPF1	4	3	6285
NM_006382	CDRT1	12	11	31043
NM_001282540	CDRT1	13	12	54224
NM_001007530	CDRT15	3	2	979
NM_001190790	CDRT15L2	2	1	1189
NM_001204477	CDRT4	4	3	31595
NM_001264	CDSN	2	1	5389
NM_004680	CDY1	2	1	2786
NM_170723	CDY1	1	0	2223
NM_170723	CDY1	1	0	2223
NM_004680	CDY1	2	1	2786
NM_001003894	CDY1B	1	0	2223
NM_001003895	CDY1B	2	1	2786
NM_001003894	CDY1B	1	0	2223
NM_001003895	CDY1B	2	1	2786
NM_004825	CDY2A	1	0	1961
NM_004825	CDY2A	1	0	1961
NM_001001722	CDY2B	1	0	1961
NM_001001722	CDY2B	1	0	1961
NM_001143970	CDYL	7	6	119448
NM_004824	CDYL	7	6	179100
NM_001143971	CDYL	7	6	65554
NM_152342	CDYL2	7	6	200501
NM_001278392	CEACAM18	6	5	11964
NM_001102597	CEACAM20	13	12	23339
NM_001102599	CEACAM20	12	11	23339
NM_001102598	CEACAM20	11	10	23339
NM_001102600	CEACAM20	12	11	23339
NM_001277163	CEACAM3	6	5	15071
NM_001815	CEACAM3	7	6	15071
NM_001817	CEACAM4	7	6	8100
NM_006890	CEACAM7	5	4	14863
NM_001816	CEACAM8	6	5	14689
NM_005195	CEBPD	1	0	1252
NM_001805	CEBPE	2	1	2307
NM_001971	CELA1	8	7	18238
NM_033440	CELA2A	8	7	15365
NM_015849	CELA2B	8	7	15301
NM_005747	CELA3A	8	7	10888
NM_007352	CELA3B	8	7	12431
NM_001048212	CEMP1	1	0	1375
NM_145039	CENPBD1	1	0	3059
NM_001812	CENPC	19	18	73269
NM_199294	CENPS	5	4	12715
NM_144998	CENPX	4	3	4208
NM_001271007	CENPX	4	3	4208
NM_001271006	CENPX	5	4	4208
NM_014704	CEP104	22	21	45154
NM_001199165	CEP112	27	26	556556
NM_145036	CEP112	27	26	556331
NM_001037325	CEP112	7	6	191005
NM_152446	CEP128	24	23	443065
NM_014984	CEP131	26	25	33360
NM_001009811	CEP131	25	24	33360
NM_025009	CEP135	26	25	84557
NM_001271933	CEP164	32	31	91490
NM_014956	CEP164	33	32	85413
NM_001042404	CEP170	19	18	130980
NM_001042405	CEP170	19	18	130980
NM_014812	CEP170	20	19	130980
NM_015005	CEP170B	18	17	31459
NM_001112726	CEP170B	19	18	31459
NM_032898	CEP19	3	2	5977
NM_032142	CEP192	45	44	133692
NM_007186	CEP250	35	34	56582
NM_033395	CEP295	30	29	68708
NM_014810	CEP350	38	37	160109
NM_001145314	CEP44	11	10	49478
NM_001040157	CEP44	12	11	36656
NM_001083535	CEP57L1	13	12	68761
NM_001271852	CEP57L1	11	10	68761
NM_001271853	CEP57L1	11	10	68761
NM_173830	CEP57L1	11	10	34610
NM_015147	CEP68	7	6	30649
NM_018140	CEP72	12	11	41263
NM_024899	CEP76	12	11	30152
NM_001271989	CEP76	11	10	30152
NM_001042399	CEP83	16	15	151710
NM_016122	CEP83	17	16	151710
NM_001281518	CEP85	7	6	9757
NM_001281517	CEP85	13	12	44887
NM_022778	CEP85	14	13	44887
NM_001042475	CEP85L	13	12	191087
NM_001178035	CEP85L	14	13	249305
NM_206921	CEP85L	6	5	160427
NM_032816	CEP89	19	18	92967
NM_138363	CEP95	20	19	30906
NM_024548	CEP97	11	10	42689
NM_006090	CEPT1	9	8	44893
NM_001007794	CEPT1	9	8	45477
NM_005454	CER1	2	1	2985
NM_003869	CES2	12	11	10649
NM_198061	CES2	12	11	10649
NM_173815	CES4A	12	11	21169
NM_001190202	CES4A	10	9	9245
NM_001190201	CES4A	12	11	9245
NM_001190158	CES5A	14	13	109879
NM_001143685	CES5A	13	12	29218
NM_145024	CES5A	12	11	29218
NM_000078	CETP	16	15	21923
NM_001286085	CETP	15	14	21923
NM_001012502	CFAP157	9	8	7034
NM_001195005	CFAP300	4	3	28675
NM_032930	CFAP300	7	6	37124
NM_001271440	CFAP410	7	6	10460
NM_001271441	CFAP410	7	6	10460
NM_001271442	CFAP410	8	7	9396
NM_004928	CFAP410	7	6	10460
NM_001200049	CFAP46	58	57	134195
NM_173695	CFAP47	11	10	98136
NM_145020	CFAP53	8	7	39304
NM_001306084	CFAP54	69	68	385979
NM_001008723	CFAP58	18	17	101328
NM_001144872	CFAP73	8	7	9420
NM_001080484	CFAP74	18	17	50526
NM_207417	CFAP77	7	6	163125
NM_001282957	CFAP77	6	5	163125
NM_001136483	CFAP97D1	6	5	4253
XM_017020910	CFAP97D2	8	7	49951
NM_001193282	CFAP99	15	14	44072
NM_001710	CFB	18	17	6142
NM_001079530	CFC1B	6	5	6900
NM_001079530	CFC1B	6	5	6900
NM_002113	CFHR1	6	5	12460
NM_005666	CFHR2	5	4	15424
NM_021023	CFHR3	6	5	19275
NM_001166624	CFHR3	5	4	19275
NM_001201550	CFHR4	10	9	30701
NM_006684	CFHR4	6	5	30701
NM_001201551	CFHR4	10	9	30701
NM_030787	CFHR5	10	9	32138
NM_000204	CFI	13	12	61489
NM_033377	CGB1	3	2	1367
NM_033378	CGB2	3	2	1367
NM_033043	CGB3	3	2	1468
NM_033142	CGB7	3	2	1468
NM_033183	CGB8	3	2	1475
NM_006569	CGREF1	6	5	18535
NM_001166241	CGREF1	7	6	11751
NM_001166239	CGREF1	6	5	18313
NM_001166240	CGREF1	6	5	19776
NM_003956	CH25H	1	0	1379
NM_001008708	CHAC2	3	2	7360
NM_001267	CHAD	4	3	4376
NM_138481	CHADL	6	5	11423
NM_032436	CHAMP1	3	2	12840
NM_001164145	CHAMP1	3	2	12840
NM_001164144	CHAMP1	3	2	12840
NM_203298	CHCHD1	3	2	1600
NM_016139	CHCHD2	4	3	4923
NM_032309	CHCHD5	4	3	4583
NM_001011671	CHCHD7	4	3	6863
NM_001011670	CHCHD7	4	3	6863
NM_001011669	CHCHD7	5	4	6863
NM_001011668	CHCHD7	5	4	6863
NM_001011667	CHCHD7	5	4	6863
NM_024300	CHCHD7	5	4	6863
NM_001256338	CHD1L	17	16	53158
NM_001256337	CHD1L	18	17	53158
NM_024568	CHD1L	23	22	53158
NM_001256336	CHD1L	22	21	53158
NM_004284	CHD1L	23	22	53158
NM_006387	CHERP	17	16	24565
NM_001025199	CHI3L2	10	9	13731
NM_004000	CHI3L2	11	10	15783
NM_001025197	CHI3L2	10	9	15783
NM_001142677	CHID1	12	11	43017
NM_001142676	CHID1	14	13	43017
NM_001142675	CHID1	13	12	47201
NM_001142674	CHID1	14	13	43017
NM_023947	CHID1	13	12	43017
NM_000390	CHM	15	14	186383
NM_001145414	CHM	5	4	78469
NM_020412	CHMP1B	1	0	3061
NM_016079	CHMP3	6	5	60069
NM_001193517	CHMP3	6	5	60069
NM_001005753	CHMP3	5	4	60069
NM_014169	CHMP4A	6	5	4251
NM_152284	CHMP4C	5	4	27062
NM_024591	CHMP6	8	7	8294
NM_152272	CHMP7	11	10	18364
NM_019015	CHPF2	4	3	6340
NM_001284295	CHPF2	5	4	6340
NM_017444	CHRAC1	3	2	5857
NM_003741	CHRD	23	22	9758
NM_000747	CHRNB1	11	10	12528
NM_001256657	CHRND	11	10	10507
NM_000751	CHRND	12	11	10507
NM_000080	CHRNE	12	11	5307
NM_005199	CHRNG	12	11	6603
NM_024533	CHST5	3	2	6642
NM_031422	CHST9	6	5	269709
NM_001256316	CHST9	5	4	269709
NM_001039690	CHTF8	4	3	14583
NM_001040146	CHTF8	4	3	14161
NM_001206612	CHTOP	6	5	12326
NM_001244664	CHTOP	4	3	12326
NM_015607	CHTOP	6	5	12326
NM_001014812	CIAO2A	4	3	21451
NM_001289108	CIAO2A	3	2	21451
NM_032231	CIAO2A	5	4	21451
NM_016062	CIAO2B	5	4	2370
NM_022493	CIAO3	11	10	11230
NM_144697	CIART	5	4	4274
NM_054113	CIB3	6	5	12109
NM_001029881	CIB4	7	6	60140
NM_145269	CIBAR1	8	7	28745
NM_001283034	CIBAR1	7	6	28745
NM_001279	CIDEA	5	4	23278
NM_003613	CILP	9	8	15505
NM_033426	CIPC	4	3	19054
NM_004882	CIR1	10	9	47567
NM_001136498	CISD3	4	3	5350
NM_145071	CISH	3	2	5379
NM_013324	CISH	4	3	5379
NM_001131018	CIZ1	17	16	25526
NM_001131017	CIZ1	18	17	25526
NM_001131016	CIZ1	17	16	25526
NM_001131015	CIZ1	18	17	38320
NM_012127	CIZ1	17	16	38320
NM_001257975	CIZ1	18	17	26041
NM_001257976	CIZ1	16	15	25526
NM_016951	CKLF	4	3	13726
NM_001040138	CKLF	4	3	13726
NM_016326	CKLF	2	1	13726
NM_181641	CKLF	3	2	13726
NM_181640	CKLF	3	2	13726
NM_174891	CLBA1	5	4	9241
NM_001828	CLC	4	3	6778
NM_001285	CLCA1	14	13	31450
NM_006536	CLCA2	14	13	32473
NM_012128	CLCA4	14	13	33675
NM_000085	CLCNKB	20	19	13592
NM_001165945	CLCNKB	13	12	8566
NM_012129	CLDN12	3	2	12622
NM_001185073	CLDN12	3	2	12622
NM_001185072	CLDN12	4	3	12622
NM_001146078	CLDN14	3	2	82199
NM_001146077	CLDN14	3	2	115949
NM_012130	CLDN14	2	1	5821
NM_001146079	CLDN14	2	1	19470
NM_144492	CLDN14	3	2	19470
NM_014343	CLDN15	5	4	5856
NM_001185080	CLDN15	6	5	6730
NM_006580	CLDN16	5	4	24273
NM_016369	CLDN18	5	4	23490
NM_001002026	CLDN18	5	4	34838
NM_020384	CLDN2	2	1	10487
NM_001171095	CLDN2	2	1	12503
NM_001171092	CLDN2	2	1	30699
NM_001001346	CLDN20	2	1	12537
NM_194284	CLDN23	1	0	1953
NM_001185149	CLDN24	1	0	664
NM_001101389	CLDN25	1	0	691
NM_001306	CLDN3	1	0	1275
NM_001185023	CLDN7	3	2	3044
NM_001185022	CLDN7	5	4	3292
NM_001307	CLDN7	4	3	3044
NM_199328	CLDN8	1	0	2147
NM_152353	CLDND2	4	3	1907
NM_006344	CLEC10A	9	8	5746
NM_182906	CLEC10A	9	8	5746
NM_201623	CLEC12A	5	4	14188
NM_138337	CLEC12A	6	5	14188
NM_001207010	CLEC12A	7	6	34281
NM_001129998	CLEC12B	6	5	8170
NM_205852	CLEC12B	5	4	7319
NM_175060	CLEC14A	1	0	2372
NM_001204118	CLEC17A	14	13	28062
NM_207390	CLEC17A	13	12	28062
NM_182619	CLEC18A	13	12	13447
NM_001136214	CLEC18A	13	12	13644
NM_001271197	CLEC18A	13	12	13363
NM_001011880	CLEC18B	13	12	12841
NM_173619	CLEC18C	12	11	12872
NM_016511	CLEC1A	6	5	28527
NM_016509	CLEC1B	6	5	6239
NM_001099431	CLEC1B	5	4	6239
NM_001130711	CLEC2A	5	4	19156
NM_001197317	CLEC2D	4	3	29849
NM_001004419	CLEC2D	6	5	29849
NM_013269	CLEC2D	5	4	29849
NM_001197319	CLEC2D	3	2	29849
NM_001197318	CLEC2D	4	3	29849
NM_001080511	CLEC2L	5	4	21059
NM_005752	CLEC3A	3	2	9560
NM_001244755	CLEC3A	2	1	3017
NM_194450	CLEC4A	5	4	14977
NM_194448	CLEC4A	4	3	14977
NM_194447	CLEC4A	5	4	14977
NM_016184	CLEC4A	6	5	14977
NM_080387	CLEC4D	6	5	8826
NM_014358	CLEC4E	6	5	7659
NM_001258027	CLEC4F	7	6	11958
NM_173535	CLEC4F	7	6	11957
NM_198492	CLEC4G	9	8	3216
NM_001244856	CLEC4G	9	8	3216
NM_001144908	CLEC4M	6	5	6458
NM_001144907	CLEC4M	6	5	6458
NM_001144906	CLEC4M	6	5	6458
NM_001144911	CLEC4M	5	4	6458
NM_001144909	CLEC4M	8	7	6458
NM_001144910	CLEC4M	8	7	6458
NM_014257	CLEC4M	7	6	6458
NM_001144905	CLEC4M	8	7	6458
NM_001144904	CLEC4M	7	6	6458
NM_013252	CLEC5A	7	6	19628
NM_001007033	CLEC6A	6	5	22337
NM_197954	CLEC7A	3	2	2948
NM_197950	CLEC7A	4	3	13494
NM_197947	CLEC7A	6	5	13494
NM_197948	CLEC7A	5	4	13494
NM_197949	CLEC7A	4	3	13494
NM_022570	CLEC7A	5	4	13494
NM_207345	CLEC9A	9	8	35291
NM_001253750	CLECL1	4	3	17441
NM_001267701	CLECL1	3	2	17441
NM_172004	CLECL1	2	1	10809
NM_152385	CLHC1	13	12	59764
NM_001135598	CLHC1	11	10	60014
NM_004669	CLIC3	6	5	1966
NM_001195555	CLINT1	12	11	73434
NM_001195556	CLINT1	12	11	73434
NM_014666	CLINT1	12	11	73434
NM_001025233	CLLU1	2	1	6997
NM_001025232	CLLU1OS	4	3	8056
NM_052964	CLNK	19	18	194550
NM_006012	CLPP	6	5	7454
NM_001252598	CLPS	2	1	2364
NM_001252597	CLPS	4	3	2364
NM_001832	CLPS	3	2	2364
NM_001010886	CLPSL1	3	2	7012
NM_207409	CLPSL2	3	2	2960
NM_001286550	CLPSL2	4	3	2960
NM_006660	CLPX	14	13	34781
NM_001079827	CLRN2	3	2	11941
NM_020665	CLTRN	6	5	37717
NM_199167	CLUL1	9	8	33595
NM_001289036	CLUL1	11	10	53297
NM_014410	CLUL1	9	8	53297
NM_001010852	CLVS2	6	5	76950
NM_001836	CMA1	5	4	2761
NM_020188	CMC2	4	3	30805
NM_001018024	CMC4	3	2	9649
NM_198390	CMIP	21	20	266594
NM_030629	CMIP	21	20	216415
NM_181269	CMTM1	4	3	12746
NM_181270	CMTM1	4	3	12746
[truncated: 10,876 more rows]
